# Supplementary material for: WI-38 senescence is associated with global and site-specific hypomethylation
Source: Aging (Albany NY). 2014 Jul 19;6(7):564–74. doi: 10.18632/aging.100679 (PMC4153623; doi:10.18632/aging.100679)
Supplement: Supplementary file 1 [file aging-06-564-s001.xlsx]

## Sheet: PD 38 - PD 47 ME
S1: Illumina® HumanMethylation27 BeadChip results. LOG2-FOLD shows log2(PD 47-beta/PD 38-beta), PD 38-beta and PD 47-beta show the beta-value averages from three samples of each PD level, Diff-Scores were used as a measure for statistical difference with a diff-score of -13/13 as a cutoff. CHR stands for chromosome. Mapinfo indicates the location of the affected CpG on the chromosome. TSS-Coordin…
SYMBOL	LOG2-FOLD CHANGE	PD 38-beta	PD 47-beta	Diff-Score	NAME	ACCESSION	GENE_ID	CHR	MAPINFO	TSS_COORDINATE	DISTANCE_TO_TSS	CPG_ISLAND	CPG_ISLAND_LOCATIONS
TMEM53	-2.46029	0.102772	0.0186747	-20.6806	cg02890926	NM_024587.2	GeneID:79639	1	44912942	44912686	256	TRUE	1:44912008-44913252
SMYD4	-2.15606	0.337463	0.0757162	-117.229	cg04005701	NM_052928.1	GeneID:114826	17	1680391	1679844	547	TRUE	17:1679534-1680496
ADPN	-2.02498	0.362741	0.0891284	-118.773	cg23653187	NM_025225.2	GeneID:80339	22	42650590	42650952	362	TRUE	22:42650559-42652185
SLC24A4	-1.95766	0.218302	0.0562011	-51.4768	cg15052901	NM_153646.2	GeneID:123041	14	91858355	91858678	323	FALSE
XBP1	-1.87469	0.106134	0.0289413	-15.143	cg14013300	NM_005080.2	GeneID:7494	22	27526047	27526560	513	TRUE	22:27525822-27526947
CYBRD1	-1.77887	0.174114	0.050739	-30.4994	cg10731149	NM_024843.2	GeneID:79901	2	172086932	172087229	297	TRUE	2:172086881-172088589
R3HDM1	-1.75687	0.210685	0.0623393	-41.6794	cg20119051	NM_015361.2	GeneID:23518	2	136005195	136005553	358	TRUE	2:136003486-136006366
JMJD2D	-1.72607	0.128213	0.0387553	-18.4896	cg24146183	NM_018039.2	GeneID:55693	11	94346603	94346493	110	TRUE	11:94345788-94346832
CAP1	-1.71029	0.165923	0.0507058	-27.7083	cg27072323	NM_006367.2	GeneID:10487	1	40279445	40279015	430	TRUE	1:40277835-40279723
LOC283932	-1.59166	0.303171	0.100589	-61.1267	cg03627896	NM_175901.3	GeneID:283932	16	30841835	30842091	256	TRUE	16:30840504-30842816
MRPS21	-1.56591	0.321535	0.108603	-65.3872	cg05191071	NM_018997.1	GeneID:54460	1	148532714	148532893	179	TRUE	1:148532637-148533320
HTR6	-1.46653	0.132578	0.0479736	-14.8991	cg10741760	NM_000871.1	GeneID:3362	1	19864611	19864367	244	TRUE	1:19863719-19865436
GRIN2C	-1.45808	0.122512	0.0445913	-13.0997	cg09722397	NM_000835.3	GeneID:2905	17	70367538	70367602	64	TRUE	17:70367092-70369736
DKFZP586D0919	-1.44196	0.243776	0.0897259	-36.8975	cg08881519	NM_015433.2	GeneID:25895	12	56451812	56452650	838	TRUE	12:56451721-56452312
PHKA2	-1.40407	0.177581	0.0671009	-22.1052	cg07314984	NM_000292.1	GeneID:5256	X	18913164	18912097	1067	TRUE	X:18911769-18913306
CPNE4	-1.385	0.248253	0.0950537	-35.2283	cg09147222	NM_130808.1	GeneID:131034	3	133236252	133236534	282	TRUE	3:133236061-133236984
TTLL1	-1.37146	0.250706	0.0968981	-35.2283	cg09047884	NM_012263.3	GeneID:25809	22	41814928	41815373	445	TRUE	22:41814921-41816049
LAMC1	-1.34442	0.149749	0.0589727	-15.5096	cg10847798	NM_002293.2	GeneID:3915	1	181260075	181259176	899	TRUE	1:181258319-181260177
AAMP	-1.29265	0.172397	0.0703724	-18.0965	cg25559243	NM_001087.2	GeneID:14	2	218844046	218843137	909	TRUE	2:218843972-218844206
TSP50	-1.27452	0.220733	0.0912426	-26.0758	cg19668234	NM_013270.2	GeneID:29122	3	46734453	46734368	85	TRUE	3:46733944-46734676
GTF2I	-1.27401	0.174101	0.0719926	-17.8514	cg11334469	NM_032999.1	GeneID:2969	7	73709080	73709966	886	TRUE	7:73708762-73709168
TCF21	-1.26231	0.155884	0.0649843	-14.7211	cg24215443	NM_003206.2	GeneID:6943	6	134252291	134251970	321	TRUE	6:134252144-134253150
C11orf1	-1.25711	0.494412	0.206853	-99.036	cg04545708	NM_022761.1	GeneID:64776	11	111255565	111255475	90	FALSE
PTRH2	-1.20442	0.233696	0.101411	-25.4733	cg08793459	NM_016077.3	GeneID:51651	17	55139429	55139638	209	TRUE	17:55138776-55140351
USP29	-1.19565	0.27544	0.120254	-30.8855	cg16547341	NM_020903.2	GeneID:57663	19	62322503	62323321	818	TRUE	19:62321956-62323350
CHCHD3	-1.19546	0.156445	0.068311	-13.4212	cg07590705	NM_017812.1	GeneID:54927	7	132417050	132417373	323	TRUE	7:132416994-132417769
CA2	-1.19516	0.177342	0.0774519	-16.2304	cg19876444	NM_000067.1	GeneID:760	8	86563949	86563498	451	TRUE	8:86562612-86564342
APC	-1.18628	0.258406	0.113553	-28.2813	cg01240931	NM_000038.3	GeneID:324	5	112101942	112101483	459	FALSE
DGKD	-1.16524	0.170828	0.076171	-14.5934	cg25506396	NM_003648.2	GeneID:8527	2	233927606	233927892	286	TRUE	2:233927127-233929126
ZNF7	-1.16103	0.219842	0.0983116	-21.4428	cg20845050	NM_003416.1	GeneID:7553	8	146024470	146023807	663	FALSE
HDAC6	-1.13389	0.49614	0.226083	-81.5379	cg10783042	NM_006044.2	GeneID:10013	X	48545757	48545431	326	TRUE	X:48544530-48545980
MAP3K7	-1.08732	0.175834	0.0827537	-13.4072	cg01087382	NM_003188.2	GeneID:6885	6	91353911	91353628	283	TRUE	6:91352433-91353967
IVNS1ABP	-1.08452	0.234175	0.110425	-20.6806	cg08358671	NM_006469.4	GeneID:10625	1	183553430	183553084	346	TRUE	1:183551785-183553696
TMEM32	-1.07285	0.179434	0.0852995	-13.4212	cg21932800	NM_173470.1	GeneID:93380	X	134884524	134883800	724	TRUE	X:134883206-134884683
RBMX2	-1.06844	0.25349	0.120872	-22.615	cg26655138	NM_016024.1	GeneID:51634	X	129363768	129363688	80	TRUE	X:129363360-129364137
PADI4	-1.05325	0.451154	0.217403	-57.4989	cg18333690	NM_012387.1	GeneID:23569	1	17507303	17507279	24	FALSE
CLEC10A	-1.04512	0.194	0.0940137	-14.3465	cg21550483	NM_006344.2	GeneID:10462	17	6924830	6924324	506	FALSE
SLC6A4	-1.04427	0.21447	0.103994	-16.5998	cg22584138	NM_001045.2	GeneID:6532	17	25586346	25586831	485	TRUE	17:25586148-25587346
SEC61G	-1.04042	0.248175	0.120659	-20.7088	cg00945507	NM_014302.3	GeneID:23480	7	54795171	54794433	738	TRUE	7:54793833-54795259
RETNLB	-1.03854	0.200815	0.0977608	-14.8991	cg14659547	NM_032579.1	GeneID:84666	3	109958816	109958820	4	FALSE
K6IRS2	-1.03775	0.294527	0.14346	-26.9458	cg06494782	NM_080747.1	GeneID:140807	12	51281713	51281559	154	TRUE	12:51280885-51281747
UBE3B	-1.02667	0.248393	0.121921	-20.275	cg20092036	NM_183414.1	GeneID:89910	12	108398524	108399822	1298	FALSE
KCTD18	-1.01524	0.189661	0.0938342	-13.1337	cg22444610	NM_152387.2	GeneID:130535	2	201083332	201083037	295	TRUE	2:201082549-201083401
SPAG7	-1.00823	0.288185	0.143273	-24.6344	cg12815142	NM_004890.1	GeneID:9552	17	4813327	4811832	1495	TRUE	17:4813118-4813369
RAB3D	-0.992654	0.19493	0.0979624	-13.0997	cg20780953	NM_004283.2	GeneID:9545	19	11311511	11311321	190	TRUE	19:11311011-11311597
ATG12	-0.991916	0.279572	0.140571	-22.615	cg26233209	NM_004707.2	GeneID:9140	5	115206663	115205398	1265	FALSE
GTF2H4	-0.971432	0.219753	0.112074	-14.8991	cg00296685	NM_001517.4	GeneID:2968	6	30984051	30983956	95	TRUE	6:30983195-30984459
RUNX3	-0.95771	0.269664	0.138843	-19.9859	cg03171924	NT_004610.18	GeneID:864	1	25130919			TRUE	1:25127692-25131906
C9orf82	-0.95123	0.24048	0.124374	-16.3931	cg09491779	NM_024828.2	GeneID:79886	9	26883124	26882725	399	FALSE
WDR32	-0.940401	0.222343	0.11586	-14.2471	cg04660234	NM_024345.2	GeneID:79269	9	37790484	37791296	812	TRUE	9:37790088-37791686
CD40	-0.935403	0.211325	0.110501	-13.0997	cg21601405	NM_001250.3	GeneID:958	20	44180413	44180313	100	TRUE	20:44180138-44180422
C21orf124	-0.929437	0.243033	0.127608	-15.8901	cg21755709	NM_032920.1	GeneID:85006	21	43973826	43973311	515	TRUE	21:43973825-43974068
FGF23	-0.917001	0.254607	0.134842	-16.5147	cg14119236	NM_020638.2	GeneID:8074	12	4359336	4359155	181	TRUE	12:4359234-4359462
L3MBTL2	-0.903219	0.246689	0.131903	-15.2218	cg14679202	NM_031488.4	GeneID:83746	22	39930924	39931259	335	TRUE	22:39930321-39931565
OR10H1	-0.897662	0.467962	0.251181	-44.8388	cg24477636	NM_013940.1	GeneID:26539	19	15780005	15779847	158	FALSE
ABCG4	-0.897036	0.379698	0.203894	-29.5912	cg03222066	NM_022169.3	GeneID:64137	11	118524594	118524960	366	FALSE
FLJ35801	-0.888376	0.231633	0.125133	-13.4212	cg15425811	NM_153044.1	GeneID:150291	22	29648181	29648396	215	TRUE	22:29647630-29649039
SYT8	-0.884434	0.35762	0.193722	-26.7424	cg26473272	NM_138567.2	GeneID:90019	11	1812844	1812282	562	FALSE
HYLS1	-0.872804	0.241597	0.131932	-13.7912	cg25041439	NM_145014.1	GeneID:219844	11	125258320	125258719	399	FALSE
UNQ467	-0.865032	0.328967	0.180614	-22.1052	cg05241571	NM_207392.1	GeneID:388533	19	40673064	40673196	132	FALSE
HIST1H4E	-0.861209	0.250346	0.137813	-14.1962	cg16706631	NM_003545.3	GeneID:8367	6	26312802	26312852	50	TRUE	6:26312577-26313287
FLJ11016	-0.855137	0.281637	0.155693	-16.62	cg03273615	NM_018301.2	GeneID:55285	X	106249029	106248690	339	FALSE
APC2	-0.844928	0.336759	0.187487	-21.8058	cg18133957	NM_005883.2	GeneID:10297	19	1401493	1401148	345	TRUE	19:1400768-1401581
SH2D4B	-0.838104	0.503664	0.281739	-45.3299	cg08772206	NM_207372.1	GeneID:387694	10	82287773	82287638	135	FALSE
ADAMTS13	-0.834245	0.534261	0.299655	-51.4768	cg16112945	NM_139025.2	GeneID:11093	9	135275627	135276941	1314	FALSE
PON3	-0.831408	0.268398	0.150834	-14.563	cg10329418	NM_000940.1	GeneID:5446	7	94864117	94863598	519	TRUE	7:94863421-94864257
CFTR	-0.826462	0.300304	0.169345	-17.1429	cg25509184	NM_000492.2	GeneID:1080	7	116906618	116907253	635	TRUE	7:116906608-116907566
SP2	-0.801429	0.301615	0.173061	-16.1232	cg14360917	NM_003110.4	GeneID:6668	17	43347121	43347677	556	FALSE
ATP4A	-0.776234	0.331943	0.193818	-17.6169	cg04713352	NM_000704.2	GeneID:495	19	40746853	40746400	453	FALSE
MMP9	-0.772318	0.279966	0.163913	-13.3242	cg02310296	NM_004994.2	GeneID:4318	20	44070765	44070954	189	FALSE
RASSF5	-0.769031	0.321898	0.188894	-16.4246	cg02589695	NT_021877.18	GeneID:83593	1	204797622			TRUE	1:204796949-204797698
SUSD1	-0.75674	0.438377	0.259445	-27.7083	cg14862827	NM_022486.3	GeneID:64420	9	113976778	113977377	599	TRUE	9:113976541-113977814
ARMCX2	-0.749731	0.396859	0.236018	-22.4436	cg19055639	NM_177949.1	GeneID:9823	X	100800794	100801491	697	TRUE	X:100800529-100800899
DHX8	-0.736197	0.358251	0.215065	-17.8904	cg23347958	NM_004941.1	GeneID:1659	17	38916826	38916860	34	TRUE	17:38916405-38917727
ZNF19	-0.732037	0.372127	0.224041	-18.9861	cg11706111	NM_006961.2	GeneID:7567	16	70080645	70080742	97	TRUE	16:70080524-70081125
CENTA1	-0.730862	0.306276	0.184545	-13.5787	cg00969446	NM_006869.1	GeneID:11033	7	961192	960792	400	TRUE	7:959794-961282
GYS2	-0.719652	0.306546	0.186148	-13.1878	cg04184278	NM_021957.2	GeneID:2998	12	21649026	21648821	205	FALSE
GLRA2	-0.707532	0.355521	0.217709	-16.1127	cg05206587	NM_002063.2	GeneID:2742	X	14457801	14457571	230	FALSE
ZNF143	-0.704982	0.428007	0.262561	-22.615	cg14037413	NM_003442.3	GeneID:7702	11	9439170	9439089	81	TRUE	11:9438246-9439848
HIST1H2AG	-0.699742	0.332699	0.204837	-14.1509	cg08717396	NM_021064.3	GeneID:8969	6	27208754	27208800	46	TRUE	6:27208047-27209299
LRRC50	-0.695612	0.348381	0.215107	-14.9769	cg08965527	NM_178452.3	GeneID:123872	16	82735714	82736423	709	TRUE	16:82735439-82737262
MORN1	-0.693871	0.585915	0.362208	-44.157	cg03533858	NM_024848.1	GeneID:79906	1	2314256	2312853	1403	FALSE
CDK9	-0.687502	0.330236	0.205053	-13.4187	cg08999352	NM_001261.2	GeneID:1025	9	129587031	129588152	1121	TRUE	9:129586837-129589076
CHST13	-0.663649	0.388981	0.245556	-16.4246	cg22919728	NM_152889.1	GeneID:166012	3	127725180	127725866	686	FALSE
PSD4	-0.661541	0.351837	0.222432	-13.6762	cg21450627	NM_012455.2	GeneID:23550	2	113647311	113648031	720	FALSE
MGC39497	-0.656129	0.384984	0.244303	-15.7113	cg02789485	NM_152436.1	GeneID:144321	12	74069695	74071156	1461	FALSE
AQP9	-0.626479	0.396065	0.256553	-14.8991	cg11098259	NM_020980.2	GeneID:366	15	56217683	56217771	88	FALSE
FLJ32130	-0.620085	0.447495	0.291155	-18.5029	cg12582366	NM_152458.4	GeneID:146540	16	30504041	30504511	470	TRUE	16:30503906-30504857
ABCB11	-0.615963	0.456598	0.297927	-19.0638	cg20118424	NM_003742.2	GeneID:8647	2	169595521	169596079	558	FALSE
ELOVL3	-0.610547	0.4224	0.27665	-15.9387	cg18390025	NM_152310.1	GeneID:83401	10	103976726	103976133	593	TRUE	10:103976562-103976832
TSCOT	-0.610465	0.40623	0.266075	-14.7211	cg10726357	NM_033051.2	GeneID:57864	9	114693364	114692866	498	TRUE	9:114692124-114693426
PARK2	-0.603228	0.547291	0.36027	-27.7083	cg24816866	NM_004562.1	GeneID:5071	6	163069664	163068793	871	FALSE
MMP9	-0.60079	0.384692	0.253663	-13.0105	cg20925811	NM_004994.2	GeneID:4318	20	44071924	44070954	970	TRUE	20:44071899-44072184
SELP	-0.574183	0.430811	0.289362	-14.3979	cg09060914	NM_003005.2	GeneID:6403	1	167866182	167866031	151	FALSE
BXDC1	-0.57412	0.594555	0.399361	-29.9529	cg05213296	NM_032194.1	GeneID:84154	6	111409422	111409984	562	TRUE	6:111409384-111410415
PPIE	-0.561266	0.421272	0.285499	-13.1585	cg24920358	NM_006112.2	GeneID:10450	1	39976872	39977117	245	TRUE	1:39976458-39978042
ABI3	-0.556922	0.54366	0.369553	-22.6258	cg21400896	NM_016428.2	GeneID:51225	17	44643568	44642588	980	FALSE
MATN4	-0.555418	0.529035	0.359987	-21.0497	cg14448104	NM_003833.2	GeneID:8785	20	43366970	43367645	675	TRUE	20:43366148-43367134
G10	-0.5531	0.451018	0.307393	-14.4972	cg02798801	NM_003910.2	GeneID:8896	7	98843199	98844548	1349	FALSE
IFI16	-0.548938	0.440302	0.300956	-13.6254	cg21406461	NM_005531.1	GeneID:3428	1	157245581	157246332	751	FALSE
ATP1A3	-0.545837	0.456429	0.312651	-14.4375	cg07051960	NM_152296.3	GeneID:478	19	47191459	47190222	1237	TRUE	19:47191425-47191661
MGST2	-0.542377	0.637345	0.437626	-32.5512	cg02688643	NM_002413.3	GeneID:4258	4	140804973	140806372	1399	FALSE
HLA-DOB	-0.533487	0.618121	0.427049	-28.9661	cg17103109	NM_002120.2	GeneID:3112	6	32893119	32892762	357	FALSE
IL1R1	-0.520244	0.551715	0.384686	-20.2906	cg15233681	NM_000877.2	GeneID:3554	2	102137034	102136834	200	FALSE
LHPP	-0.508318	0.485237	0.341142	-14.1068	cg07596401	NM_022126.2	GeneID:64077	10	126140076	126140402	326	TRUE	10:126139604-126141042
SLC4A1	-0.507811	0.475129	0.334153	-13.4139	cg03580247	NM_000342.1	GeneID:6521	17	39701014	39700993	21	FALSE
SLC39A7	-0.481989	0.564036	0.403844	-18.0965	cg10940418	NM_006979.1	GeneID:7922	6	33275283	33276675	1392	FALSE
HAMP	-0.477485	0.536278	0.38517	-15.4274	cg02131995	NM_021175.2	GeneID:57817	19	40464757	40465250	493	FALSE
FGFR1	-0.476868	0.531677	0.382029	-15.0472	cg15791248	NM_000604.2	GeneID:2260	8	38445887	38445293	594	FALSE
CDC2L2	-0.474645	0.560495	0.403357	-17.1429	cg18241160	NM_033527.1	GeneID:985	1	1645098	1645623	525	TRUE	1:1644546-1646532
FLJ43339	-0.446881	0.53097	0.389534	-13.0997	cg13474734	NM_207380.1	GeneID:388115	15	38418083	38417626	457	FALSE
SLC17A3	-0.444844	0.531871	0.390746	-13.0369	cg15691649	NM_006632.1	GeneID:10786	6	25990307	25990493	186	TRUE	6:25990159-25990690
MAGEB3	-0.443626	0.563056	0.414006	-14.8991	cg14774175	NM_002365.3	GeneID:4114	X	30158839	30158474	365	FALSE
ZNF511	-0.423354	0.570878	0.425698	-13.9754	cg15856055	NM_145806.2	GeneID:118472	10	134971285	134972413	1128	TRUE	10:134971124-134971365
GDF2	-0.422606	0.577068	0.430536	-14.3004	cg05441133	NM_016204.1	GeneID:2658	10	48036897	48036859	38	TRUE	10:48036704-48037082
IL16	-0.420402	0.572352	0.427671	-13.8166	cg09837803	NM_004513.3	GeneID:3603	15	79261396	79262255	859	FALSE
IL8RB	-0.416336	0.600178	0.449728	-15.4762	cg14150666	NM_001557.2	GeneID:3579	2	218699555	218698991	564	FALSE
LTB4R	-0.412088	0.582995	0.438141	-13.9691	cg20542800	NM_181657.1	GeneID:1241	14	23852374	23852357	17	FALSE
TTLL11	-0.411734	0.716296	0.538454	-28.2813	cg27218220	NM_194252.1	GeneID:158135	9	123896217	123895384	833	TRUE	9:123896020-123896348
GPR142	-0.409286	0.65723	0.494892	-20.275	cg22377428	NM_181790.1	GeneID:350383	17	69875477	69875240	237	FALSE
C10orf39	-0.401898	0.614283	0.464927	-15.3574	cg06985415	NM_194303.1	GeneID:282973	10	133805401	133805422	21	TRUE	10:133805370-133805647
GABRR1	-0.396536	0.586745	0.445738	-13.0997	cg00333528	NM_002042.2	GeneID:2569	6	89984204	89983779	425	FALSE
PRTN3	-0.39123	0.624157	0.475907	-15.2154	cg09134726	NM_002777.3	GeneID:5657	19	792082	791985	97	FALSE
FLJ25801	-0.390113	0.645533	0.492587	-16.9979	cg25569462	NM_173553.1	GeneID:205860	4	189263854	189263402	452	FALSE
CBFB	-0.376886	0.66025	0.508458	-17.0315	cg13500388	NM_001755.2	GeneID:865	16	65619636	65620551	915	TRUE	16:65619345-65619667
GSG1	-0.372936	0.622772	0.480911	-13.6321	cg08399444	NM_031289.1	GeneID:83445	12	13139815	13139952	137	FALSE
TLR8	-0.366077	0.637882	0.494926	-14.1967	cg07759587	NM_016610.2	GeneID:51311	X	12834704	12834679	25	FALSE
CMTM8	-0.339617	0.680214	0.537539	-15.0731	cg01617750	NM_178868.3	GeneID:152189	3	32254265	32255175	910	TRUE	3:32254265-32255884
CD226	-0.329803	0.722166	0.574588	-18.2204	cg13164537	NM_006566.1	GeneID:10666	18	65775051	65775139	88	FALSE
INSL4	-0.329087	0.778795	0.619952	-26.6098	cg12067261	NM_002195.1	GeneID:3641	9	5221539	5221419	120	FALSE
OXT	-0.319744	0.818641	0.655906	-31.5417	cg26267561	NM_000915.2	GeneID:5020	20	3000224	3000266	42	TRUE	20:3000023-3001341
IFI35	-0.227636	0.801899	0.684848	-14.2471	cg08090640	NM_005533.2	GeneID:3430	17	38412815	38412351	464	FALSE
SIL1	-0.107901	0.94085	0.873049	-13.9754	cg13326338	NM_022464.3	GeneID:64374	5	138491518	138491447	71	FALSE
URP2	0.152744	0.807076	0.897212	15.3409	cg24088438	NM_031471.4	GeneID:83706	11	63730805	63730782	23	FALSE
PNMA6A	0.154869	0.798598	0.889096	14.3979	cg02274362	NM_032882.2	GeneID:84968	X	151992153	151991521	632	TRUE	X:151990675-151993000
GZMM	0.157539	0.802965	0.895613	16.0868	cg18338021	NM_005317.2	GeneID:3004	19	495349	495027	322	TRUE	19:495156-495371
INT1	0.158567	0.801155	0.894232	16.0581	cg06942110	XM_931325.1	GeneID:26173	7	1511911	1510490	1421	TRUE	7:1511890-1512098
PLEKHA4	0.175431	0.767252	0.86646	14.571	cg08077345	NM_020904.1	GeneID:57664	19	54064085	54063670	415	FALSE
PTGER1	0.177177	0.755198	0.853879	13.237	cg10468702	NM_000955.2	GeneID:5731	19	14446209	14447174	965	TRUE	19:14443018-14446252
FLJ36445	0.177511	0.75371	0.852394	13.0997	cg21550442	NM_153233.1	GeneID:163183	19	41191679	41191509	170	FALSE
HK2	0.182791	0.784996	0.891031	20.6806	cg24107142	NM_000189.4	GeneID:3099	2	74913863	74913290	573	FALSE
ALKBH	0.194014	0.72906	0.834002	13.3205	cg20385229	NM_006020.1	GeneID:8846	14	77245223	77244097	1126	FALSE
ALOX12	0.195935	0.72969	0.835835	13.7798	cg08946332	NM_000697.1	GeneID:239	17	6840612	6840128	484	TRUE	17:6839463-6841283
MST1R	0.196195	0.746949	0.855759	16.5147	cg08687163	NM_002447.1	GeneID:4486	3	49915857	49916074	217	TRUE	3:49915736-49916551
CACNG1	0.196321	0.725648	0.831427	13.3242	cg24459563	NM_000727.2	GeneID:786	17	62471071	62471168	97	TRUE	17:62471033-62471431
GPR77	0.205272	0.713541	0.822644	13.5343	cg10451565	NM_018485.1	GeneID:27202	19	52531971	52532211	240	FALSE
SMPD2	0.208053	0.734912	0.848918	17.5075	cg20811607	NM_003080.1	GeneID:6610	6	109867524	109868659	1135	TRUE	6:109867223-109867542
HBZ	0.209327	0.754807	0.872669	22.3525	cg21960110	NM_005332.2	GeneID:3050	16	142482	142854	372	FALSE
PYGO1	0.227534	0.677313	0.793019	13.3205	cg23412777	NM_015617.1	GeneID:26108	15	53668998	53668342	656	TRUE	15:53668831-53669077
CALCRL	0.229406	0.675547	0.791979	13.4187	cg21350115	NM_005795.2	GeneID:10203	2	188021078	188021223	145	FALSE
MARCH3	0.233496	0.69222	0.81383	16.4925	cg25842356	NM_178450.2	GeneID:115123	5	126395269	126394149	1120	TRUE	5:126393114-126395304
NOXA1	0.23401	0.671667	0.789947	13.7798	cg04837071	NM_006647.1	GeneID:10811	9	139438470	139437668	802	TRUE	9:139436592-139438641
MTNR1B	0.234506	0.710663	0.836098	20.2521	cg17838516	NM_005959.3	GeneID:4544	11	92343184	92342437	747	TRUE	11:92342113-92343227
KIAA1409	0.234924	0.679143	0.799246	14.8991	cg16034652	NM_020818.2	GeneID:57578	14	92868062	92869318	1256	FALSE
EPOR	0.236043	0.734759	0.865368	26.7128	cg24477567	NM_000121.2	GeneID:2057	19	11356295	11356019	276	FALSE
NUP50	0.236924	0.736731	0.868221	27.374	cg07986773	NM_153645.1	GeneID:10762	22	43937273	43938390	1117	TRUE	22:43936901-43939556
CEP76	0.237949	0.706062	0.83267	20.2521	cg11688990	NM_024899.2	GeneID:79959	18	12694161	12692703	1458	FALSE
ETNK2	0.240066	0.658889	0.778179	13.3396	cg01566404	NM_018208.1	GeneID:55224	1	202388548	202387645	903	FALSE
TH	0.245886	0.679995	0.806352	17.2693	cg08573687	NM_199292.1	GeneID:7054	11	2149617	2149611	6	FALSE
RGN	0.246706	0.691053	0.819931	19.5542	cg09625066	NM_004683.4	GeneID:9104	X	46822515	46822719	204	TRUE	X:46822380-46823326
GPR172A	0.250198	0.672784	0.800189	17.1429	cg16628918	NM_024531.3	GeneID:79581	8	145551626	145553033	1407	FALSE
PKN1	0.25491	0.695397	0.82979	22.615	cg19103609	NM_002741.3	GeneID:5585	19	14404524	14405166	642	TRUE	19:14403590-14405780
SCAND2	0.257046	0.682881	0.816063	20.6806	cg17866455	NM_022050.2	GeneID:54581	15	82974955	82975713	758	TRUE	15:82974893-82975916
C20orf85	0.259679	0.674433	0.807439	19.7304	cg12813792	NM_178456.2	GeneID:128602	20	56159101	56159389	288	TRUE	20:56159084-56159699
SEC61A2	0.264695	0.648534	0.779138	16.5147	cg18678121	NM_018144.2	GeneID:55176	10	12210813	12211704	891	TRUE	10:12210774-12212203
PLAGL1	0.264951	0.660482	0.793632	18.4792	cg17895149	NM_006718.2	GeneID:5325	6	144371522	144371246	276	TRUE	6:144370510-144371695
ATP6V1B1	0.265272	0.651471	0.782978	17.0756	cg06946880	NM_001692.2	GeneID:525	2	71016631	71016528	103	FALSE
COX6A2	0.268357	0.616055	0.741999	13.2447	cg13726463	NM_005205.2	GeneID:1339	16	31347182	31347222	40	TRUE	16:31346216-31347186
PHF13	0.271181	0.697551	0.841801	28.2279	cg06778853	NM_153812.1	GeneID:148479	1	6595207	6596332	1125	TRUE	1:6594739-6598463
TRIP10	0.276258	0.692264	0.838366	28.2813	cg02085507	NM_004240.2	GeneID:9322	19	6690192	6690707	515	TRUE	19:6690009-6691192
GTL3	0.280296	0.622597	0.75611	15.9387	cg25771195	NM_013242.2	GeneID:29105	16	56721315	56720797	518	TRUE	16:56720072-56721737
ADAM30	0.281239	0.672435	0.817169	25.2736	cg23131777	NM_021794.2	GeneID:11085	1	120240448	120240636	188	TRUE	1:120240390-120240877
SMPD3	0.284731	0.673845	0.820867	26.7128	cg17217677	NM_018667.2	GeneID:55512	16	67040695	67039905	790	TRUE	16:67039271-67040730	16:67038237-67039167
SRCRB4D	0.288053	0.66942	0.817356	26.6709	cg13594711	NM_080744.1	GeneID:136853	7	75876721	75876948	227	FALSE
BSCL2	0.288155	0.58593	0.715466	13.0997	cg20342105	NM_032667.4	GeneID:26580	11	62231486	62231395	91	FALSE
RAD51C	0.28836	0.670157	0.818431	26.7424	cg19208681	NM_002876.2	GeneID:5889	17	54124627	54124962	335	TRUE	17:54124258-54125393
AQP3	0.288428	0.64249	0.784679	20.7088	cg26624914	NM_004925.3	GeneID:360	9	33438382	33437590	792	FALSE
RPS2	0.291131	0.596039	0.729313	14.4754	cg18279742	NM_002952.3	GeneID:6187	16	1955704	1954828	876	TRUE	16:1953433-1955741
ISG20	0.294308	0.712732	0.874021	43.0981	cg02334775	NM_002201.4	GeneID:3669	15	86983680	86983043	637	TRUE	15:86983615-86983821
ABI3	0.295209	0.625178	0.767133	19.2608	cg25839227	NM_016428.2	GeneID:51225	17	44643501	44642588	913	FALSE
EGF	0.297003	0.589242	0.723937	14.5934	cg13379236	NM_001963.2	GeneID:1950	4	111053257	111053499	242	FALSE
MEST	0.303048	0.569759	0.702939	13.4269	cg09872616	NM_177524.1	GeneID:4232	7	129913418	129913282	136	TRUE	7:129912883-129914215
MERTK	0.309866	0.63458	0.78662	24.5888	cg08023751	NM_006343.2	GeneID:10461	2	112371583	112372662	1079	TRUE	2:112371396-112371690
STRN4	0.310672	0.65124	0.807723	28.2813	cg14799446	NM_013403.1	GeneID:29888	19	51942447	51941527	920	FALSE
ALAS1	0.316222	0.593658	0.739144	18.5029	cg03929796	NM_199166.1	GeneID:211	3	52206880	52207156	276	TRUE	3:52206843-52207774
NTF3	0.323744	0.615932	0.770885	24.1302	cg02554564	NM_002527.3	GeneID:4908	12	5473392	5473527	135	TRUE	12:5473265-5473465
ACOX2	0.324422	0.562965	0.704924	15.8247	cg22012981	NM_003500.2	GeneID:8309	3	58497729	58497956	227	FALSE
CAPN2	0.32473	0.587762	0.736131	19.2608	cg14972271	NM_001748.3	GeneID:824	1	221966359	221966824	465	TRUE	1:221965941-221967552
RBM13	0.325673	0.596803	0.747943	20.8209	cg23663332	NM_032509.2	GeneID:84549	8	33461496	33462259	763	TRUE	8:33461192-33462760
HEXIM1	0.328682	0.605166	0.760007	22.9779	cg04700814	NM_006460.2	GeneID:10614	17	40579963	40580467	504	FALSE
ZC3H7A	0.331984	0.631066	0.79435	29.1207	cg14959707	NM_014153.2	GeneID:29066	16	11783892	11783909	17	TRUE	16:11783829-11784227
MAB21L2	0.333031	0.598598	0.754028	22.6611	cg20334738	NM_006439.3	GeneID:10586	4	151722389	151722753	364	FALSE
ZNF583	0.334373	0.621721	0.783884	28.0747	cg12445208	NM_152478.1	GeneID:147949	19	61608017	61607530	487	TRUE	19:61606860-61608033
C9orf66	0.336381	0.533755	0.673911	14.2899	cg08909157	NM_152569.1	GeneID:157983	9	205561	205741	180	TRUE	9:203685-205584
FLJ33790	0.3367	0.519638	0.656232	13.0947	cg16547529	NM_173583.1	GeneID:283212	11	74818329	74818755	426	TRUE	11:74818131-74820083
KCNA3	0.337966	0.525405	0.664097	13.6762	cg00995520	NM_002232.2	GeneID:3738	1	111019805	111019178	627	TRUE	1:111017242-111019922
JAK2	0.345332	0.667115	0.847531	46.2379	cg20394284	NM_004972.2	GeneID:3717	9	4974206	4975245	1039	TRUE	9:4974182-4975767
TJAP1	0.347458	0.58755	0.747549	24.0793	cg00229387	NM_080604.1	GeneID:93643	6	43553920	43553289	631	FALSE
FBXO17	0.348776	0.543199	0.691753	17.1429	cg24010336	NM_024907.5	GeneID:115290	19	44159098	44158220	878	TRUE	19:44159079-44159662
C20orf165	0.36138	0.543221	0.697851	19.2608	cg21023770	NM_080608.3	GeneID:128497	20	43950634	43949645	989	FALSE
FLJ43806	0.373409	0.480481	0.62242	13.6388	cg17657618	NM_201628.1	GeneID:399563	1	15300241	15300684	443	TRUE	1:15300118-15300318
HLA-DOB	0.373961	0.564096	0.731015	25.4733	cg04576021	NM_002120.2	GeneID:3112	6	32892233	32892762	529	FALSE
CCRL2	0.38186	0.474443	0.618209	14.0714	cg14754581	NM_003965.4	GeneID:9034	3	46423757	46423725	32	FALSE
MRPS26	0.382285	0.484258	0.631185	14.9769	cg26060255	NM_030811.3	GeneID:64949	20	2973968	2974675	707	FALSE
MGC15875	0.383643	0.49974	0.651977	16.9828	cg18042806	NM_032921.1	GeneID:85007	5	177592577	177592397	180	TRUE	5:177591693-177592655
RTEL1	0.383917	0.61495	0.802436	41.8932	cg05358404	NM_016434.2	GeneID:51750	20	61759394	61760091	697	TRUE	20:61759313-61761230
CCL8	0.389518	0.457005	0.598656	13.3205	cg01636591	NM_005623.2	GeneID:6355	17	29670269	29670179	90	FALSE
CPD	0.390059	0.55765	0.73077	27.7083	cg07156669	NM_001304.3	GeneID:1362	17	25729371	25730110	739	TRUE	17:25729327-25731039
PLEK2	0.393465	0.541366	0.711108	25.2736	cg17641252	NM_016445.1	GeneID:26499	14	66948288	66948581	293	TRUE	14:66948159-66949047
KENAE	0.39527	0.561438	0.738398	29.1207	cg15003158	NM_176816.2	GeneID:202243	5	68664187	68664299	112	TRUE	5:68664081-68665657
CLUL1	0.396246	0.496412	0.653317	18.3982	cg11214889	NM_199167.1	GeneID:27098	18	587111	586998	113	TRUE	18:586591-587668
PCDHGC4	0.404664	0.496266	0.656947	19.727	cg15361590	NM_018928.2	GeneID:56098	5	140844885	140844925	40	TRUE	5:140844389-140845813
GSN	0.410515	0.446357	0.59328	14.4972	cg17071957	NM_000177.3	GeneID:2934	9	123069747	123070228	481	TRUE	9:123069482-123069814
SH2D3A	0.411691	0.43874	0.583632	13.9754	cg01036779	NM_005490.1	GeneID:10045	19	6719251	6718480	771	TRUE	19:6718910-6719312
FAM83F	0.41491	0.515321	0.687034	24.6344	cg21771250	NM_138435.1	GeneID:113828	22	38735995	38735638	357	TRUE	22:38735888-38736264
IL1R2	0.415338	0.500678	0.66771	22.1052	cg20340242	NM_004633.3	GeneID:7850	2	101974781	101974738	43	TRUE	2:101974583-101974787
RLN2	0.415789	0.542963	0.724328	29.5912	cg02875297	NM_134441.1	GeneID:6019	9	5294611	5294580	31	TRUE	9:5293703-5294659
HPX	0.421631	0.44026	0.589703	15.089	cg11547724	NM_000613.1	GeneID:3263	11	6419028	6418769	259	FALSE
PEX10	0.424729	0.428676	0.575421	14.3465	cg20664247	NM_002617.3	GeneID:5192	1	2335335	2333870	1465	TRUE	1:2335193-2335428
ECRG4	0.42865	0.465621	0.626714	19.0611	cg10885338	NM_032411.1	GeneID:84417	2	106049072	106048545	527	TRUE	2:106048153-106049083
MTHFS	0.436121	0.448195	0.606391	17.7962	cg23855392	NM_006441.1	GeneID:10588	15	77976837	77976398	439	TRUE	15:77975766-77976918
TCF8	0.437836	0.425522	0.5764	15.3924	cg24861272	NM_030751.2	GeneID:6935	10	31647159	31648148	989	TRUE	10:31647064-31650188
COPS7B	0.454588	0.466195	0.638869	22.9779	cg05422352	NM_022730.1	GeneID:64708	2	232358991	232359406	415	TRUE	2:232358962-232360229
RELB	0.462255	0.525926	0.724565	37.209	cg02727285	NM_006509.2	GeneID:5971	19	50196082	50196552	470	TRUE	19:50195726-50197301
NME5	0.479278	0.432072	0.602328	21.583	cg13707560	NM_003551.2	GeneID:8382	5	137502599	137503031	432	TRUE	5:137502546-137502930
GLRB	0.483366	0.385029	0.538271	16.0868	cg18344745	NM_000824.2	GeneID:2743	4	158216529	158216788	259	TRUE	4:158216462-158217324
NANP	0.487136	0.37086	0.51982	14.9223	cg20318748	NM_152667.1	GeneID:140838	20	25553178	25552614	564	TRUE	20:25551644-25553461
MBTPS2	0.509351	0.353467	0.503129	15.2813	cg27465531	NM_015884.1	GeneID:51360	X	21767633	21767675	42	TRUE	X:21767344-21768282
HFE2	0.534791	0.439577	0.63683	31.4064	cg06589885	NM_145277.3	GeneID:148738	1	144124550	144124635	85	FALSE
ICAM4	0.548526	0.351945	0.514751	19.1988	cg21494776	NM_001544.2	GeneID:3386	19	10258780	10258680	100	TRUE	19:10258558-10259935
CD9	0.56328	0.346248	0.511624	20.2521	cg08519905	NM_001769.2	GeneID:928	12	6179035	6179816	781	TRUE	12:6178825-6180741
MTAP	0.568427	0.293682	0.435502	14.3955	cg25162921	NM_002451.3	GeneID:4507	9	21791897	21792635	738	TRUE	9:21791708-21793468
C1orf135	0.570261	0.389423	0.578213	28.1572	cg02327719	NM_024037.1	GeneID:79000	1	26057973	26058435	462	TRUE	1:26057917-26058914
TMEM109	0.574549	0.347031	0.516802	21.5171	cg10735607	NM_024092.1	GeneID:79073	11	60437091	60438253	1162	TRUE	11:60436776-60437102
NIFIE14	0.583754	0.285395	0.427735	14.7145	cg00739120	NM_032635.2	GeneID:10430	19	40727715	40728385	670	TRUE	19:40727497-40728997
MVP	0.5852	0.463878	0.695932	52.2053	cg00334507	NM_017458.2	GeneID:9961	16	29732100	29731591	509	FALSE
Bles03	0.585723	0.265305	0.398167	13.0947	cg10467098	NM_031450.2	GeneID:83638	11	65444468	65443107	1361	FALSE
PPP2R5A	0.588123	0.294398	0.442566	16.0868	cg23909343	NM_006243.2	GeneID:5525	1	210524538	210525502	964	TRUE	1:210524499-210526748
ALOX12	0.589677	0.361662	0.544269	26.173	cg03760483	NM_000697.1	GeneID:239	17	6840021	6840128	107	TRUE	17:6839463-6841283
NTF3	0.590443	0.342694	0.515998	22.6365	cg04740359	NM_002527.3	GeneID:4908	12	5473803	5473527	276	TRUE	12:5473723-5474332
WNT1	0.59294	0.259957	0.392097	13.0929	cg21948783	NM_005430.2	GeneID:7471	12	47658741	47658503	238	TRUE	12:47657768-47661963
IL1RN	0.593479	0.301089	0.454308	17.2192	cg11783497	NM_000577.3	GeneID:3557	2	113591763	113591941	178	FALSE
ADRB1	0.600699	0.254902	0.386547	13.0997	cg04589904	NM_000684.1	GeneID:153	10	115792830	115793796	966	TRUE	10:115792649-115795530
COX6A2	0.602129	0.335796	0.509722	22.9779	cg24110063	NM_005205.2	GeneID:1339	16	31347253	31347222	31	FALSE
WDR47	0.609064	0.360675	0.550126	28.2813	cg19695867	NM_014969.3	GeneID:22911	1	109386913	109386258	655	TRUE	1:109386911-109387202
TMEM41A	0.609928	0.311747	0.475784	20.3797	cg11285843	NM_080652.2	GeneID:90407	3	186699824	186699496	328	TRUE	3:186698388-186699889
FLT1	0.613486	0.292231	0.447099	18.0965	cg01899253	NM_002019.2	GeneID:2321	13	27968056	27967232	824	TRUE	13:27965729-27968100
MMP10	0.620435	0.317998	0.488871	22.461	cg02061229	NM_002425.1	GeneID:4319	11	102156418	102156554	136	FALSE
MAPK10	0.623318	0.438134	0.674908	53.2967	cg17452384	NM_002753.2	GeneID:5602	4	87593261	87593307	46	FALSE
DHX15	0.640209	0.329226	0.513117	26.9441	cg08739282	NM_001358.2	GeneID:1665	4	24195609	24195282	327	TRUE	4:24194254-24196061
CDH5	0.643882	0.255655	0.399468	16.0918	cg22319147	NM_001795.2	GeneID:1003	16	64958100	64958064	36	FALSE
ALDH1A3	0.667408	0.275177	0.43704	20.7703	cg26509022	NT_035325.6	GeneID:220	15	99236819			TRUE	15:99236455-99238833
DAZAP1	0.668332	0.377059	0.599235	43.418	cg06341721	NM_018959.2	GeneID:26528	19	1357759	1358584	825	TRUE	19:1357198-1360039
BST2	0.678884	0.217924	0.348874	14.2886	cg01254505	NM_004335.2	GeneID:684	19	17377470	17377384	86	FALSE
FOSL1	0.698005	0.238279	0.386551	18.2129	cg18818531	NM_005438.2	GeneID:8061	11	65424853	65424573	280	TRUE	11:65423063-65425238
MAPK13	0.712382	0.2468	0.404384	20.7088	cg24155668	NM_002754.3	GeneID:5603	6	36206376	36206240	136	TRUE	6:36205912-36207197
GPR75	0.720561	0.195156	0.321582	14.2471	cg14832904	NM_006794.1	GeneID:10936	2	53940532	53940572	40	TRUE	2:53940114-53941112
SCP2	0.731612	0.189252	0.314252	14.2126	cg27535305	NM_001007098.1	GeneID:6342	1	53165238	53165536	298	TRUE	1:53164678-53166557
OSBPL5	0.731632	0.189366	0.314446	14.2201	cg20345446	NM_020896.2	GeneID:114879	11	3143380	3143116	264	TRUE	11:3142568-3143433
ATXN10	0.736789	0.287131	0.478493	30.0526	cg20269537	NM_013236.2	GeneID:25814	22	44445738	44446351	613	FALSE
NADSYN1	0.737265	0.28534	0.475666	29.9529	cg20728496	NM_018161.4	GeneID:55191	11	70841203	70841865	662	TRUE	11:70841005-70842753
CYP2S1	0.738241	0.20743	0.346023	16.9828	cg03940103	NM_030622.5	GeneID:29785	19	46390663	46391010	347	TRUE	19:46390447-46391221
MSX1	0.740434	0.262712	0.438907	26.7128	cg20161179	NT_006051.17	GeneID:4487	4	4914183			TRUE	4:4913563-4914786
C16orf48	0.791089	0.205397	0.355415	20.7088	cg26335299	NM_032140.1	GeneID:84080	16	66257644	66258129	485	TRUE	16:66257367-66258718
GREM1	0.821497	0.146486	0.258875	13.4269	cg18145505	NM_013372.5	GeneID:26585	15	30796790	30797497	707	TRUE	15:30796667-30799245
LTF	0.824899	0.147772	0.261765	13.8166	cg15261665	NM_002343.2	GeneID:4057	3	46481378	46481399	21	TRUE	3:46481007-46481567
KCTD12	0.852895	0.132805	0.239863	13.0953	cg15901783	NM_138444.2	GeneID:115207	13	76359427	76358526	901	TRUE	13:76357231-76359636
PLXDC1	0.854877	0.157515	0.284882	16.9979	cg14601284	NM_020405.3	GeneID:57125	17	34561804	34561298	506	FALSE
BHMT	0.85604	0.133934	0.24243	13.3242	cg10660256	NM_001713.1	GeneID:635	5	78443439	78443439	0	TRUE	5:78443059-78443592
WDR69	0.864895	0.13717	0.249814	14.2471	cg14329157	NM_178821.1	GeneID:164781	2	228444379	228444571	192	TRUE	2:228444287-228444815
ADAMTS18	0.885339	0.127523	0.23556	13.6762	cg20807545	NM_139054.2	GeneID:170692	16	76027039	76026512	527	TRUE	16:76025670-76027234
HEYL	0.89213	0.139732	0.259331	16.0868	cg25462291	NM_014571.2	GeneID:26508	1	39877643	39877905	262	TRUE	1:39877450-39878424
MGC13125	0.91773	0.152834	0.288724	20.275	cg05862431	NM_032725.2	GeneID:84811	11	116149408	116148914	494	TRUE	11:116148339-116149455
ZIC1	0.93546	0.238684	0.456483	46.2379	cg14456683	NM_003412.3	GeneID:7545	3	148609700	148609871	171	TRUE	3:148609249-148612068
PHKG1	0.936719	0.111172	0.212803	13.2548	cg05724065	NM_006213.2	GeneID:5260	7	56128022	56128121	99	FALSE
GPD1L	0.948255	0.169313	0.326697	26.7128	cg21255732	NM_015141.2	GeneID:23171	3	32123501	32123148	353	TRUE	3:32122715-32123925
RAB7L1	0.968001	0.127903	0.250194	18.0965	cg09635067	NM_003929.1	GeneID:8934	1	204010631	204010747	116	TRUE	1:204010334-204011389
PAOX	0.984457	0.10062	0.199084	13.2813	cg18361093	NM_207129.1	GeneID:196743	10	135043202	135042731	471	TRUE	10:135041675-135043320
PTPRR	1.0316	0.109071	0.222972	17.1875	cg23694248	NM_002849.2	GeneID:5801	12	69600582	69600853	271	TRUE	12:69600579-69600967
MLH3	1.03962	0.153057	0.314638	29.3569	cg24482053	NM_014381.1	GeneID:27030	14	74587756	74587886	130	TRUE	14:74587314-74588130
C22orf16	1.04651	0.112997	0.233397	19.0829	cg03290040	NM_213720.1	GeneID:400916	22	22440355	22440141	214	TRUE	22:22439507-22441179
FLJ23554	1.05124	0.0984901	0.204102	15.6476	cg21795497	NM_024806.2	GeneID:79864	11	122258536	122258683	147	TRUE	11:122258441-122259357
HCFC1R1	1.06462	0.120656	0.252368	22.3525	cg02062650	NM_001002017.1	GeneID:54985	16	3014538	3014288	250	TRUE	16:3013862-3014613
HMFN0839	1.10838	0.107426	0.231615	21.1235	cg10685945	NM_032717.3	GeneID:84803	4	84676846	84676677	169	TRUE	4:84675528-84677242
HOXD10	1.12631	0.0796762	0.173933	14.1439	cg21591742	NM_002148.2	GeneID:3236	2	176689244	176689746	502	TRUE	2:176688866-176689812
ALPL	1.12771	0.0833784	0.182192	15.089	cg23352747	NM_000478.2	GeneID:249	1	21708023	21708456	433	TRUE	1:21707968-21709033
ICAM5	1.13799	0.146675	0.322793	36.8975	cg11195002	NM_003259.2	GeneID:7087	19	10260805	10261655	850	TRUE	19:10260371-10267511
IL11RA	1.13983	0.0800593	0.176414	14.6982	cg21504624	NM_004512.3	GeneID:3590	9	34643580	34643932	352	FALSE
BRSK2	1.14729	0.0880083	0.194936	17.2803	cg14021073	NM_003957.1	GeneID:9024	11	1366961	1367705	744	TRUE	11:1366566-1368933
MAPK11	1.15317	0.0772116	0.171721	14.4375	cg00164898	NM_138993.2	GeneID:5600	22	49051254	49050906	348	TRUE	22:49050256-49052718
RAX	1.18776	0.0795998	0.181328	16.5657	cg19576304	NM_013435.1	GeneID:30062	18	55091002	55091605	603	TRUE	18:55090435-55093173
MAMDC2	1.22066	0.0812179	0.189281	18.7798	cg11656547	NM_153267.3	GeneID:256691	9	71848567	71848340	227	TRUE	9:71848534-71849733
CHDH	1.22385	0.0745318	0.174084	16.5147	cg07356771	NM_018397.1	GeneID:55349	3	53854990	53855216	226	TRUE	3:53854601-53856178
ZNF441	1.2822	0.0702847	0.170939	17.5075	cg03405173	NM_152355.1	GeneID:126068	19	11738721	11738907	186	TRUE	19:11738608-11739834
FAM46C	1.30101	0.0607976	0.149807	14.6176	cg01152499	NM_017709.2	GeneID:54855	1	117949843	117950127	284	TRUE	1:117949333-117951379
HOXD11	1.30294	0.0939056	0.231694	28.3046	cg16632715	NM_021192.2	GeneID:3237	2	176680359	176680330	29	TRUE	2:176679513-176681344
SCO2	1.33542	0.0885045	0.223341	28.2813	cg24856732	NM_005138.1	GeneID:9997	22	49310352	49310838	486	TRUE	22:49309999-49312129
FOXE3	1.35879	0.0710948	0.182337	21.6191	cg18815943	NM_012186.1	GeneID:2301	1	47654901	47654331	570	TRUE	1:47654351-47655785
SORCS3	1.36588	0.0634606	0.16356	18.4349	cg16787600	NM_014978.1	GeneID:22986	10	106390870	106390849	21	TRUE	10:106389391-106393271
HSPC065	1.37416	0.0747608	0.193793	24.3864	cg15272690	NM_014157.2	GeneID:29070	16	56841525	56841364	161	TRUE	16:56841079-56841615
ATP1B1	1.38304	0.0563559	0.146986	15.9093	cg16959606	NM_001677.3	GeneID:481	1	167341558	167342571	1013	TRUE	1:167341291-167343181
SNX10	1.38665	0.0830714	0.217207	28.8056	cg10316381	NM_013322.2	GeneID:29887	7	26297989	26298040	51	TRUE	7:26297706-26298638
PYCARD	1.39628	0.0802275	0.211177	28.2813	cg05361373	NM_013258.3	GeneID:29108	16	31121384	31121752	368	TRUE	16:31120978-31121976
C22orf8	1.40982	0.0783401	0.208152	28.2279	cg13438834	NM_017911.1	GeneID:55007	22	44085194	44084479	715	TRUE	22:44083482-44085479
FAM111B	1.45479	0.0766613	0.210142	29.5912	cg21833459	NM_198947.1	GeneID:374393	11	58630531	58631286	755	TRUE	11:58630327-58631670
FTSJ3	1.49136	0.0475853	0.133788	15.5321	cg07844572	NM_017647.2	GeneID:117246	17	59257785	59258188	403	TRUE	17:59257457-59259153
UTF1	1.49212	0.0490336	0.137932	16.3931	cg09053680	NM_003577.2	GeneID:8433	10	134894104	134893768	336	TRUE	10:134892848-134895213
DOC2A	1.50254	0.0498793	0.141329	17.1875	cg03920233	NM_003586.2	GeneID:8448	16	29930200	29929902	298	TRUE	16:29929602-29930548
EGFR	1.53576	0.0523771	0.151863	20.2521	cg03860890	NM_201282.1	GeneID:1956	7	55053782	55054219	437	TRUE	7:55053462-55055739
KLHL25	1.58077	0.0475065	0.142106	19.0391	cg24345138	NM_022480.2	GeneID:64410	15	84138437	84139104	667	TRUE	15:84138113-84139588
RAB36	1.7095	0.0604125	0.197578	35.3853	cg13894021	NM_004914.2	GeneID:9609	22	21817383	21817513	130	TRUE	22:21817260-21818058
DCUN1D5	1.79391	0.036161	0.12539	18.9861	cg11995303	NM_032299.2	GeneID:84259	11	102468371	102468079	292	TRUE	11:102467300-102468412
PRTFDC1	1.83473	0.0468309	0.167048	30.0181	cg04180868	NM_020200.5	GeneID:56952	10	25281468	25281539	71	TRUE	10:25280993-25282054
GSTM1	1.83774	0.045634	0.163119	29.3569	cg17901463	NM_000561.2	GeneID:2944	1	110031996	110031965	31	TRUE	1:110031594-110032306
DDIT3	1.86079	0.0411131	0.149326	26.7424	cg15021531	NM_004083.4	GeneID:1649	12	56200195	56200567	372	TRUE	12:56200006-56202042
FEN1	1.92829	0.0281638	0.107193	16.0868	cg02005336	NM_004111.4	GeneID:2237	11	61316699	61316726	27	TRUE	11:61316278-61317629	11:61314902-61315199
PPP2CB	1.99491	0.0471095	0.187774	41.9031	cg24698622	NM_001009552.1	GeneID:5516	8	30790139	30789894	245	TRUE	8:30788471-30790153
TYK2	2.27786	0.0426406	0.206788	57.4989	cg08896629	NM_003331.3	GeneID:7297	19	10352577	10352211	366	TRUE	19:10351757-10352815

## Sheet: PD 38 - PD 54 ME
S1: Illumina® HumanMethylation27 BeadChip results. LOG2-FOLD shows log2(PD 54-beta/PD 38-beta), PD38-beta and PD 54-beta show the beta-value averages from three samples of each PD level, Diff-Scores were used as a measure for statistical difference with a diff-score of -13/13 as a cutoff. CHR stands for chromosome. Mapinfo indicates the location of the affected CpG on the chromosome. TSS-Coordina…
SYMBOL	LOG2-FOLD CHANGE	PD 38-beta	PD 54-beta	Diff-Score	NAME	ACCESSION	GENE_ID	CHR	MAPINFO	TSS_COORDINATE	DISTANCE_TO_TSS	CPG_ISLAND	CPG_ISLAND_LOCATIONS
GFPT2	2.48294	0.026206	0.146501	49.0123	cg18602314	NM_005110.1	GeneID:9945	5	179713408	179712921	487	TRUE	5:179711599-179713980
SPINT2	2.35793	0.0494639	0.253568	94.5712	cg15375239	NM_021102.2	GeneID:10653	19	43447127	43447042	85	TRUE	19:43446599-43447858
TUBB2B	2.32286	0.0414077	0.207172	71.8704	cg03462055	NM_178012.3	GeneID:347733	6	3172555	3172870	315	TRUE	6:3171849-3175236
GPR150	2.22861	0.0523878	0.245533	85.595	cg02320454	NM_199243.1	GeneID:285601	5	94981773	94981736	37	TRUE	5:94981212-94983154
HPCAL4	2.21699	0.0186409	0.0866659	20.6383	cg22827640	NM_016257.2	GeneID:51440	1	39929712	39929676	36	TRUE	1:39929406-39930055
EIF1AX	2.20733	0.0570853	0.26363	92.7392	cg14354749	NM_001412.3	GeneID:1964	X	20069990	20069887	103	TRUE	X:20069197-20070982
RASSF1	2.19634	0.0659483	0.30225	110.423	cg08047457	NM_007182.4	GeneID:11186	3	50353417	50353371	46	TRUE	3:50352707-50353696
SPAG1	2.15787	0.046992	0.209704	67.4559	cg27537600	NM_003114.3	GeneID:6674	8	101239567	101239439	128	TRUE	8:101238713-101240129
GADD45G	2.12341	0.0407121	0.177392	53.5176	cg20070077	NM_006705.2	GeneID:10912	9	91409815	91409748	67	TRUE	9:91409464-91411301
ADCY1	2.10713	0.0498213	0.214647	67.6607	cg07651242	NM_021116.1	GeneID:107	7	45581245	45580646	599	TRUE	7:45579547-45582131
IGFBP2	2.08328	0.0554049	0.234789	74.8842	cg25854162	NM_000597.2	GeneID:3485	2	217205862	217206372	510	TRUE	2:217205664-217207225
LIPG	2.07652	0.0656624	0.276956	92.4993	cg21574400	NM_006033.2	GeneID:9388	18	45342307	45342425	118	TRUE	18:45340923-45342671
RASSF1	2.07389	0.0417768	0.175888	51.6508	cg21554552	NM_007182.4	GeneID:11186	3	50353429	50353371	58	TRUE	3:50352707-50353696
CACNB3	2.05933	0.0195768	0.0815947	17.309	cg23921699	NM_000725.2	GeneID:784	12	47498828	47498779	49	TRUE	12:47498031-47499203
WIF1	2.01604	0.0367968	0.148833	40.232	cg19427610	NM_007191.2	GeneID:11197	12	63801298	63801356	58	TRUE	12:63801033-63802623
RAP1GA1	1.99542	0.0787299	0.313921	103.852	cg22396755	NM_002885.1	GeneID:5909	1	21867684	21868386	702	TRUE	1:21867575-21867913
LHX2	1.98742	0.0605623	0.240146	72.9446	cg07109287	NM_004789.3	GeneID:9355	9	125813894	125813710	184	TRUE	9:125813052-125815466
KRT19	1.98713	0.0839067	0.332646	111.953	cg11462865	NM_002276.3	GeneID:3880	17	36937650	36938160	510	TRUE	17:36937180-36938240
ERBB2	1.97887	0.0493099	0.194372	55.5559	cg09875273	NM_004448.2	GeneID:2064	17	35097513	35097919	406	TRUE	17:35097487-35098143
LRP8	1.97345	0.0281654	0.110607	25.9662	cg02502132	NM_017522.3	GeneID:7804	1	53565527	53566409	882	TRUE	1:53564070-53566625
IRF8	1.9695	0.0473838	0.185571	52.1197	cg24826867	NM_002163.2	GeneID:3394	16	84490354	84490275	79	TRUE	16:84489299-84490591
SLC13A5	1.95342	0.043669	0.169127	45.7782	cg22040627	NM_177550.2	GeneID:284111	17	6557754	6557388	366	TRUE	17:6556978-6558390
PARK2	1.94807	0.055344	0.213549	61.4782	cg21926612	NM_004562.1	GeneID:5071	6	163069159	163068793	366	FALSE
ACADM	1.94188	0.0218055	0.0837778	16.8043	cg05467918	NM_000016.2	GeneID:34	1	75962533	75962870	337	TRUE	1:75962418-75963438
E2F2	1.94103	0.0628873	0.241475	71.5303	cg23574449	NM_004091.2	GeneID:1870	1	23729810	23730300	490	TRUE	1:23729519-23730740
SLC27A2	1.92484	0.0739641	0.280838	86.111	cg13021384	NM_003645.2	GeneID:11001	15	48262046	48261714	332	TRUE	15:48261381-48262610
ALOX15	1.90523	0.050835	0.190412	51.7482	cg09872233	NM_001140.3	GeneID:246	17	4491674	4491709	35	TRUE	17:4489288-4492318
L3MBTL4	1.90283	0.0561052	0.209804	58.4618	cg17688525	NM_173464.1	GeneID:91133	18	6404978	6404901	77	TRUE	18:6403816-6405200
LOC387758	1.88881	0.0797419	0.295307	89.8361	cg04622802	NM_203371.1	GeneID:387758	11	26972448	26972204	244	TRUE	11:26972301-26972579
MOS	1.87738	0.0532179	0.195527	52.5575	cg22411207	NM_005372.1	GeneID:4342	8	57188855	57189095	240	TRUE	8:57187963-57189242
CD8B1	1.87615	0.0778662	0.285843	85.3892	cg26850754	NM_004931.2	GeneID:926	2	86942307	86942549	242	TRUE	2:86942147-86942826
LOC401498	1.86648	0.0490755	0.17895	46.563	cg11308840	NM_212558.1	GeneID:401498	9	32773516	32773497	19	TRUE	9:32772777-32774000
SLC34A2	1.86544	0.0353956	0.128974	30.154	cg19616230	NM_006424.1	GeneID:10568	4	25266527	25266571	44	TRUE	4:25266077-25266795
SCAMP3	1.83827	0.0448808	0.160486	39.7837	cg01745448	NM_005698.2	GeneID:10067	1	153499003	153498819	184	TRUE	1:153498335-153499113
CDKL2	1.83548	0.0428031	0.15276	37.1411	cg14988503	NM_003948.2	GeneID:8999	4	76774571	76774595	24	TRUE	4:76774245-76775285
TBC1D10B	1.82419	0.0248708	0.0880698	16.8136	cg25463428	NM_015527.2	GeneID:26000	16	30288610	30288402	208	TRUE	16:30288517-30289737
NEUROG1	1.8165	0.0403442	0.142103	33.263	cg11248413	NM_006161.2	GeneID:4762	5	134899557	134899538	19	TRUE	5:134898284-134900130
FZD3	1.79881	0.0461881	0.160703	38.7386	cg11710000	NM_017412.2	GeneID:7976	8	28408478	28407692	786	TRUE	8:28407045-28408515
NOXO1	1.7857	0.126473	0.43606	329.938	cg00043004	NM_144603.2	GeneID:124056	16	1970893	1971441	548	TRUE	16:1968853-1971062
PTOV1	1.77552	0.0478843	0.163938	39.1161	cg08064891	NM_017432.2	GeneID:53635	19	55047066	55046294	772	TRUE	19:55045182-55047484
EMILIN3	1.76133	0.0722067	0.244788	64.3834	cg18938204	NM_052846.1	GeneID:90187	20	39428271	39428912	641	TRUE	20:39427979-39429312
CECR6	1.73694	0.116356	0.387846	117.928	cg12373771	NM_031890.2	GeneID:27439	22	15981381	15982143	762	TRUE	22:15980487-15983038
THBD	1.7268	0.0734261	0.243035	62.2284	cg24562819	NM_000361.2	GeneID:7056	20	22977806	22978301	495	TRUE	20:22976034-22978669
CRMP1	1.72404	0.0255802	0.0845066	14.611	cg03544320	NM_001313.3	GeneID:1400	4	5945592	5945686	94	TRUE	4:5944246-5946191
MCAM	1.72018	0.101048	0.332931	93.5277	cg21096399	NM_006500.2	GeneID:4162	11	118693355	118693050	305	TRUE	11:118692068-118693386
ENDOG	1.71095	0.0390083	0.127704	26.5996	cg04621255	NM_004435.2	GeneID:2021	9	130621219	130620600	619	TRUE	9:130619231-130621779
ROR2	1.70864	0.05199	0.16993	38.9968	cg25766046	NM_004560.2	GeneID:4920	9	93751943	93752265	322	TRUE	9:93750567-93753002
CALCB	1.70423	0.0649721	0.211715	51.4348	cg08896945	NM_000728.3	GeneID:797	11	15051644	15051722	78	TRUE	11:15051395-15052633
SLC16A13	1.70183	0.0456748	0.148586	32.4895	cg24173049	NM_201566.1	GeneID:201232	17	6880519	6880426	93	TRUE	17:6879756-6880862
ACE	1.68831	0.0478763	0.154295	33.754	cg02131967	NM_152830.1	GeneID:1636	17	58907838	58908166	328	TRUE	17:58907492-58908940
FRMPD1	1.68575	0.0552696	0.177807	40.6376	cg16235034	NM_014907.1	GeneID:22844	9	37640629	37641052	423	TRUE	9:37640579-37641558
CALB1	1.68321	0.056402	0.18113	41.4732	cg12402251	NM_004929.2	GeneID:793	8	91163987	91164283	296	TRUE	8:91163956-91164434
DGKE	1.66063	0.0578626	0.182936	41.2831	cg01344452	NM_003647.1	GeneID:8526	17	52267142	52266552	590	TRUE	17:52265332-52267632
GMPPB	1.65268	0.0495811	0.155891	33.263	cg15565533	NM_013334.2	GeneID:29925	3	49736940	49736388	552	TRUE	3:49735775-49737071
GPR176	1.65059	0.0365541	0.114766	21.8841	cg17497271	NM_007223.1	GeneID:11245	15	38000073	38000385	312	TRUE	15:37998925-38000826
TRAF3	1.6496	0.0929951	0.291768	74.0726	cg24165760	NM_003300.2	GeneID:7187	14	102313142	102313569	427	TRUE	14:102312745-102314619
C16orf51	1.64675	0.0399925	0.125227	24.593	cg14711709	NM_015421.1	GeneID:25880	16	8798792	8798991	199	TRUE	16:8798650-8799537
TERT	1.64131	0.0593988	0.185294	41.2998	cg02545192	NM_198253.1	GeneID:7015	5	1347729	1348159	430	TRUE	5:1345899-1349472
PTPRT	1.63857	0.0698389	0.217449	50.4855	cg04541293	NM_133170.2	GeneID:11122	20	41252539	41251971	568	TRUE	20:41249910-41252787
NKX2-8	1.63795	0.0873187	0.271756	66.9179	cg17685628	NM_014360.2	GeneID:26257	14	36121444	36121537	93	TRUE	14:36118956-36123512
L3MBTL4	1.6308	0.0935422	0.289687	72.2186	cg14155416	NM_173464.1	GeneID:91133	18	6404330	6404901	571	TRUE	18:6403816-6405200
FAM101A	1.62875	0.0389382	0.120415	22.9754	cg21453309	NM_181709.2	GeneID:144347	12	123340008	123339663	345	FALSE
SEC31L2	1.62253	0.0951904	0.293104	72.8683	cg20831708	NM_015490.3	GeneID:25956	10	102269363	102269585	222	TRUE	10:102268974-102269882
NTSR1	1.61952	0.0595393	0.182948	39.9417	cg03567830	NM_002531.1	GeneID:4923	20	60810316	60810634	318	TRUE	20:60810126-60811791
ATP1B2	1.59719	0.0298674	0.0903649	14.6164	cg10043101	NM_001678.3	GeneID:482	17	7494865	7494979	114	TRUE	17:7494494-7496173
KCNIP1	1.59634	0.0577384	0.174587	36.8096	cg08422599	NM_014592.2	GeneID:30820	5	169863670	169863626	44	TRUE	5:169863374-169864167
VWA1	1.58847	0.0539007	0.162096	33.1758	cg25234611	NM_022834.3	GeneID:64856	1	1361210	1360772	438	TRUE	1:1360547-1361469
NTRK2	1.5766	0.0688089	0.205233	44.4817	cg22402007	NM_001007097.1	GeneID:4915	9	86472643	86473286	643	TRUE	9:86472369-86475721
HDAC11	1.57602	0.0443132	0.132118	24.9437	cg22319470	NT_022517.17	GeneID:79885	3	13496370			TRUE	3:13495978-13497310
C1orf188	1.56928	0.118528	0.351738	89.1741	cg15731815	NM_173795.2	GeneID:148646	1	6191847	6191507	340	TRUE	1:6190892-6192286
ZAK	1.56796	0.092734	0.274942	63.9102	cg03608974	NM_133646.1	GeneID:51776	2	173648514	173648816	302	TRUE	2:173648485-173649935
CHST13	1.56708	0.068219	0.202136	43.2546	cg07745434	NM_152889.1	GeneID:166012	3	127726091	127725866	225	TRUE	3:127725561-127726214
NKIRAS2	1.55794	0.0330241	0.0972341	15.8251	cg24505527	NM_017595.4	GeneID:28511	17	37422426	37422564	138	TRUE	17:37422112-37423341
IGF2AS	1.55274	0.130325	0.382339	99.1481	cg11005826	NT_009237.17	GeneID:51214	11	2122537			TRUE	11:2121548-2122565
PLEKHQ1	1.54996	0.0419991	0.122977	22.1161	cg15083227	NM_025201.3	GeneID:80301	15	62920342	62921186	844	FALSE
POU3F3	1.54272	0.0770774	0.224559	48.3396	cg20291049	NM_006236.1	GeneID:5455	2	104838649	104838401	248	TRUE	2:104835039-104840521
RAB6IP2	1.53636	0.0443152	0.128542	23.2221	cg17416608	NM_178037.1	GeneID:23085	12	971305	970665	640	TRUE	12:969736-971609
GCNT1	1.5303	0.089857	0.259547	57.4749	cg22289360	NM_001490.3	GeneID:2650	9	78263728	78263966	238	TRUE	9:78263598-78264533
ZNF546	1.52315	0.084325	0.242365	52.3469	cg14213992	NM_178544.2	GeneID:339327	19	45195198	45194869	329	TRUE	19:45194206-45195268
IRX3	1.51989	0.0710038	0.203617	41.8173	cg24662961	NM_024336.1	GeneID:79191	16	52878171	52877879	292	TRUE	16:52875064-52879466
FLT4	1.51903	0.0826858	0.236976	50.6868	cg00489401	NM_182925.1	GeneID:2324	5	180008481	180009172	691	TRUE	5:180008152-180010059
CHAD	1.51064	0.111776	0.318489	73.6373	cg06958829	NM_001267.1	GeneID:1101	17	45901117	45901322	205	TRUE	17:45900488-45902050
TSPAN13	1.51006	0.0595417	0.169588	32.8112	cg03214212	NM_014399.3	GeneID:27075	7	16759859	16759876	17	TRUE	7:16759606-16760776
NFE2L3	1.50236	0.0641814	0.181829	35.6587	cg14534464	NM_004289.5	GeneID:9603	7	26158158	26158385	227	TRUE	7:26157838-26159762
ZNF236	1.50111	0.0978837	0.27707	60.8558	cg15059932	NM_007345.1	GeneID:7776	18	72664221	72665104	883	TRUE	18:72662639-72664433
CYP24A1	1.49634	0.0869424	0.245288	51.8082	cg18956481	NM_000782.3	GeneID:1591	20	52223546	52223931	385	TRUE	20:52222583-52223813
LSR	1.49556	0.033586	0.0947034	14.3154	cg02915261	NM_205835.2	GeneID:51599	19	40431602	40431399	203	TRUE	19:40430224-40432569
CDX2	1.49188	0.0752816	0.211734	42.7973	cg02055963	NM_001265.2	GeneID:1045	13	27441520	27441317	203	TRUE	13:27440079-27441627
SLITRK3	1.48292	0.0398539	0.111397	18.0625	cg13619915	NM_014926.2	GeneID:22865	3	166397131	166397163	32	TRUE	3:166396716-166397896
GDNF	1.47378	0.0766452	0.212881	42.3718	cg07442479	NM_000514.2	GeneID:2668	5	37875526	37875539	13	TRUE	5:37874803-37876645
CENTA2	1.46946	0.112516	0.311578	68.6579	cg05052633	NM_018404.1	GeneID:55803	17	26273611	26273059	552	TRUE	17:26272783-26274166
MYOD1	1.46218	0.0815232	0.224617	44.8082	cg18555440	NM_002478.3	GeneID:4654	11	17698263	17697735	528	TRUE	11:17696873-17700534
FLJ37478	1.45038	0.0602974	0.16478	29.789	cg08211091	NM_178557.2	GeneID:339983	4	2031721	2031385	336	TRUE	4:2029497-2032981
NFAM1	1.44629	0.0635811	0.173263	31.6779	cg17568996	NM_145912.4	GeneID:150372	22	41158069	41158340	271	FALSE
KDELR1	1.43751	0.107	0.289812	60.6491	cg18678185	NM_006801.2	GeneID:10945	19	53586842	53586622	220	TRUE	19:53586584-53586881
RTBDN	1.43722	0.0636693	0.172416	31.1592	cg08694544	NM_031429.1	GeneID:83546	19	12807228	12807230	2	TRUE	19:12807041-12808465
COX5B	1.43534	0.0370384	0.100169	14.6491	cg01568335	NM_001862.2	GeneID:1329	2	97628677	97628953	276	TRUE	2:97628311-97629884
RANBP2	1.41876	0.0835439	0.223359	42.5602	cg08733774	NM_006267.3	GeneID:5903	2	108702059	108702369	310	TRUE	2:108701097-108703275
PIR	1.41437	0.0823899	0.219605	41.4928	cg09250703	NM_003662.2	GeneID:8544	X	15421672	15421385	287	TRUE	X:15421076-15421731
RND2	1.41386	0.057269	0.152592	25.9215	cg05270634	NM_005440.3	GeneID:8153	17	38430971	38430791	180	TRUE	17:38429704-38431262
TMEM55A	1.41075	0.0606826	0.16134	27.8094	cg06688396	NM_018710.1	GeneID:55529	8	92122609	92122227	382	FALSE
TRIM35	1.40991	0.0416343	0.110631	16.5883	cg21443261	NM_171982.2	GeneID:23087	8	27225173	27224751	422	TRUE	8:27224011-27225184
SPIN1	1.40947	0.05728	0.152158	25.7289	cg11115702	NM_032038.1	GeneID:83985	16	28894199	28893650	549	TRUE	16:28892911-28894468
HPSE2	1.40723	0.107527	0.285191	57.4749	cg03388193	NM_021828.2	GeneID:60495	10	100986060	100985609	451	TRUE	10:100985526-100986619
TIRAP	1.40433	0.117131	0.310041	63.8849	cg26202340	NM_052887.2	GeneID:114609	11	125657567	125658212	645	TRUE	11:125657511-125658777
ESR1	1.40341	0.0460214	0.121739	18.9212	cg02720618	NT_025741.14	GeneID:2099	6	152171484			TRUE	6:152170010-152172178
HIST1H2BE	1.40298	0.0809465	0.21406	39.7826	cg21146268	NM_003523.2	GeneID:8344	6	26291487	26292003	516	FALSE
DPYSL5	1.39929	0.0807393	0.212968	39.3333	cg12045002	NM_020134.2	GeneID:56896	2	26923479	26924469	990	TRUE	2:26923226-26926873
BRSK2	1.39143	0.0449682	0.117969	17.8664	cg01468621	NM_003957.1	GeneID:9024	11	1368185	1367705	480	TRUE	11:1366566-1368933
PEX11A	1.38705	0.0480821	0.125755	19.4202	cg17732044	NM_003847.1	GeneID:8800	15	88035211	88034962	249	TRUE	15:88034009-88035393
TSR1	1.38518	0.101062	0.263978	50.8466	cg21870662	NM_018128.4	GeneID:55720	17	2188320	2187428	892	TRUE	17:2185926-2188447
LOC93343	1.38301	0.0482584	0.125864	19.3555	cg14147105	NM_138401.2	GeneID:93343	19	17392148	17391912	236	TRUE	19:17391317-17392695
RUNX3	1.38286	0.112832	0.294249	58.3549	cg00117172	NT_004610.18	GeneID:864	1	25128425			TRUE	1:25127692-25131906
SNX2	1.3797	0.116683	0.303626	60.6628	cg17425616	NM_003100.2	GeneID:6643	5	122138390	122138649	259	TRUE	5:122138317-122139249
CCNA1	1.37388	0.159184	0.412554	92.7392	cg12571423	NM_003914.2	GeneID:8900	13	35904748	35904633	115	TRUE	13:35903373-35904811
JUB	1.37166	0.0788911	0.204145	36.1557	cg27601516	NM_032876.4	GeneID:84962	14	22522257	22521691	566	TRUE	14:22519595-22522334
EVX1	1.37162	0.0851553	0.220349	39.8956	cg18397523	NM_001989.2	GeneID:2128	7	27248876	27248946	70	TRUE	7:27248572-27250267
TMOD2	1.37132	0.056312	0.145683	23.314	cg00919857	NM_014548.2	GeneID:29767	15	49830550	49831102	552	TRUE	15:49830408-49831846
AXIN1	1.3638	0.0462229	0.11896	17.5198	cg15001381	NM_181050.1	GeneID:8312	16	343315	342465	850	TRUE	16:341791-343515
PHYHIPL	1.36227	0.100279	0.257807	48.0923	cg25946758	NM_032439.1	GeneID:84457	10	60606031	60606353	322	TRUE	10:60605504-60607216
ARVCF	1.36226	0.0734688	0.188879	32.4021	cg22377998	NM_001670.1	GeneID:421	22	18384881	18384309	572	TRUE	22:18383358-18384977
PKD2L1	1.36083	0.0799398	0.205312	36.0313	cg05958582	NM_016112.2	GeneID:9033	10	102080356	102080233	123	FALSE
NOC4L	1.35897	0.118092	0.302907	59.0869	cg24211742	NM_024078.1	GeneID:79050	12	131193849	131194946	1097	TRUE	12:131193628-131195448
TBX21	1.35319	0.0692999	0.177045	29.4969	cg20209009	NM_013351.1	GeneID:30009	17	43166321	43165609	712	TRUE	17:43165308-43166553
SST	1.35015	0.0809112	0.206274	35.8068	cg02164046	NM_001048.3	GeneID:6750	3	188870842	188870895	53	TRUE	3:188870156-188871038
P2RY2	1.34629	0.090567	0.230273	41.0035	cg04388983	NM_002564.2	GeneID:5029	11	72607492	72606992	500	TRUE	11:72606620-72607619
LETM1	1.34437	0.0476624	0.121024	17.5649	cg10481740	NM_012318.1	GeneID:3954	4	1826901	1827772	871	TRUE	4:1826841-1828736
GLOXD1	1.33858	0.0582334	0.147274	22.807	cg10164640	NM_032756.2	GeneID:84842	1	45565144	45565132	12	TRUE	1:45564893-45566022
DOLPP1	1.3342	0.0626992	0.158087	24.899	cg01027739	NM_020438.3	GeneID:57171	9	130882559	130883227	668	TRUE	9:130882471-130883721
CHRNB1	1.31487	0.0438485	0.109086	14.5469	cg04809787	NM_000747.2	GeneID:1140	17	7289063	7289130	67	TRUE	17:7288911-7290043
NXN	1.30983	0.0489635	0.121387	16.9042	cg08785922	NM_022463.3	GeneID:64359	17	829581	829760	179	TRUE	17:828354-830334
PDE2A	1.30571	0.0644298	0.159274	24.3181	cg23792978	NM_002599.1	GeneID:5138	11	72063346	72063060	286	FALSE
HBXIP	1.29824	0.0581713	0.14306	20.9445	cg20097268	NM_006402.2	GeneID:10542	1	110752135	110752069	66	TRUE	1:110751314-110752210
MADCAM1	1.29675	0.160948	0.395407	79.5176	cg26525091	NM_130760.1	GeneID:8174	19	447239	447490	251	TRUE	19:447111-447347
NFXL1	1.29623	0.140345	0.344668	65.256	cg06297145	NM_152995.3	GeneID:152518	4	47611799	47611412	387	TRUE	4:47610480-47611802
PAQR9	1.29508	0.0516375	0.126713	17.6816	cg00970325	NM_198504.1	GeneID:344838	3	144165866	144164868	998	TRUE	3:144163706-144166078
ICAM5	1.29008	0.146675	0.358683	68.5424	cg11195002	NM_003259.2	GeneID:7087	19	10260805	10261655	850	TRUE	19:10260371-10267511
ADCY1	1.28882	0.078099	0.190817	30.154	cg13523557	NM_021116.1	GeneID:107	7	45580250	45580646	396	TRUE	7:45579547-45582131
MICAL1	1.28558	0.0520208	0.126816	17.4963	cg05949660	NM_022765.2	GeneID:64780	6	109884335	109883883	452	TRUE	6:109882585-109884615
FLJ34922	1.28289	0.0594765	0.144722	20.8858	cg18108623	NM_152270.2	GeneID:91607	17	30725434	30724733	701	TRUE	17:30724564-30725868
CCK	1.27374	0.101698	0.245894	40.9314	cg03724463	NM_000729.3	GeneID:885	3	42281528	42281399	129	TRUE	3:42281044-42282926
ADCY5	1.27141	0.0977475	0.23596	38.7168	cg13384396	NM_183357.1	GeneID:111	3	124650367	124650082	285	TRUE	3:124648852-124651990
ATP8A2	1.27004	0.139	0.335225	61.0387	cg18236477	NM_016529.3	GeneID:51761	13	24941066	24941115	49	TRUE	13:24940557-24941659
FRMPD4	1.26934	0.0608949	0.146788	20.9336	cg17398312	NM_014728.1	GeneID:9758	X	12066961	12066506	455	TRUE	X:12065825-12067363
HMFN0839	1.26702	0.107426	0.258536	43.1965	cg10685945	NM_032717.3	GeneID:84803	4	84676846	84676677	169	TRUE	4:84675528-84677242
RPL31	1.26267	0.0625647	0.150117	21.3748	cg19032144	NM_000993.2	GeneID:6160	2	100985583	100985183	400	TRUE	2:100984517-100985918
TCF7	1.26096	0.0756634	0.181331	27.2832	cg01116966	NM_201633.1	GeneID:6932	5	133477916	133478301	385	TRUE	5:133477085-133479284
BRSK2	1.2487	0.0880083	0.209132	32.2582	cg14021073	NM_003957.1	GeneID:9024	11	1366961	1367705	744	TRUE	11:1366566-1368933
FRAG1	1.24807	0.0805308	0.19128	28.7246	cg02940164	NM_014489.1	GeneID:27315	11	3786547	3786360	187	TRUE	11:3785869-3786630
CCNA1	1.24563	0.126921	0.300957	51.246	cg16422907	NM_003914.2	GeneID:8900	13	35904734	35904633	101	TRUE	13:35903373-35904811
HSPA2	1.24558	0.117702	0.279087	46.3991	cg24642523	NT_026437.11	GeneID:3306	14	64079018			TRUE	14:64075878-64079365
ZNF512	1.23836	0.107392	0.253372	40.6999	cg01464985	NM_032434.2	GeneID:84450	2	27659126	27659397	271	TRUE	2:27659123-27659757
SCGN	1.23401	0.0461778	0.108619	13.1025	cg06493994	NM_006998.3	GeneID:10590	6	25760581	25760408	173	TRUE	6:25760176-25760849
SPATA18	1.22889	0.0554538	0.129976	16.8169	cg09022993	NM_145263.1	GeneID:132671	4	52612632	52612350	282	TRUE	4:52612015-52613199
PPP1R13L	1.22825	0.218674	0.512313	111.796	cg03554552	NM_006663.2	GeneID:10848	19	50599986	50600129	143	TRUE	19:50599756-50600150
NELL2	1.22554	0.076201	0.17819	25.4896	cg14904464	NM_006159.1	GeneID:4753	12	43556057	43556405	348	TRUE	12:43555514-43557285
FLJ10847	1.22513	0.0590783	0.138111	18.2493	cg15014549	NM_018242.2	GeneID:55244	17	19377595	19377759	164	TRUE	17:19377299-19379267
DSC3	1.22505	0.0812028	0.189822	27.641	cg11832722	NM_001941.2	GeneID:1825	18	26877058	26876687	371	TRUE	18:26874977-26877256
C12orf34	1.22497	0.103298	0.241461	37.5892	cg01335367	NM_032829.1	GeneID:84915	12	108656591	108656955	364	FALSE
PRMT2	1.22439	0.053491	0.124985	15.8263	cg06725035	NM_001535.2	GeneID:3275	21	46879640	46879955	315	TRUE	21:46879361-46880668
B4GALNT4	1.22416	0.0773018	0.180591	25.9044	cg16004226	NM_178537.3	GeneID:338707	11	359875	359804	71	TRUE	11:358935-360376
COG2	1.21449	0.0548552	0.127296	16.0373	cg17031727	NM_007357.1	GeneID:22796	1	228844498	228844881	383	TRUE	1:228844295-228845376
MLNR	1.21107	0.143579	0.332398	55.9254	cg07935568	NM_001507.1	GeneID:2862	13	48692127	48692475	348	TRUE	13:48691941-48693636
FLJ23554	1.20844	0.0984901	0.227598	34.1127	cg21795497	NM_024806.2	GeneID:79864	11	122258536	122258683	147	TRUE	11:122258441-122259357
RGS5	1.20489	0.12451	0.287021	45.6711	cg24901474	NM_003617.2	GeneID:8490	1	161439664	161439496	168	FALSE
JMJD2B	1.20297	0.0505755	0.116432	13.8944	cg12072803	NM_015015.1	GeneID:23030	19	4919558	4920132	574	TRUE	19:4919382-4921114
SLC38A3	1.20203	0.0863245	0.198601	28.3867	cg19914607	NM_006841.3	GeneID:10991	3	50217509	50217709	200	TRUE	3:50217473-50218698
TFRC	1.19478	0.0800202	0.183174	25.3753	cg22956956	NM_003234.1	GeneID:7037	3	197293752	197293338	414	TRUE	3:197292528-197293786
BBS4	1.19435	0.0613397	0.14037	17.9178	cg25996835	NM_033028.2	GeneID:585	15	70765218	70765588	370	TRUE	15:70765132-70765969
SPOCK	1.19244	0.0527212	0.120488	14.3707	cg12832649	NM_004598.2	GeneID:6695	5	136862762	136862894	132	TRUE	5:136861841-136863150
CBS	1.18947	0.0647612	0.1477	19.0526	cg09622447	NM_000071.1	GeneID:875	21	43369447	43369490	43	TRUE	21:43367042-43370279
ZNF135	1.1888	0.120117	0.273823	42.0664	cg16638540	NM_003436.2	GeneID:7694	19	63262280	63262424	144	TRUE	19:63262091-63264376
RIBC2	1.18863	0.0526285	0.119959	14.222	cg23503501	NM_015653.2	GeneID:26150	22	44188457	44188244	213	TRUE	22:44187526-44188777
ACCN4	1.18486	0.113972	0.259106	39.0264	cg19210770	NM_018674.3	GeneID:55515	2	220087335	220087296	39	TRUE	2:220087160-220087532
HOXD10	1.18114	0.0796762	0.180671	24.4474	cg21591742	NM_002148.2	GeneID:3236	2	176689244	176689746	502	TRUE	2:176688866-176689812
ATRNL1	1.17863	0.0885289	0.200396	27.8352	cg06055013	NM_207303.1	GeneID:26033	10	116843654	116843114	540	TRUE	10:116842092-116844180
EPB41	1.17656	0.108867	0.24608	36.1098	cg11226328	NM_203343.1	GeneID:2035	1	29085954	29086215	261	TRUE	1:29085901-29086988
HEYL	1.17386	0.139732	0.315257	49.6046	cg25462291	NM_014571.2	GeneID:26508	1	39877643	39877905	262	TRUE	1:39877450-39878424
MGC13125	1.1685	0.152834	0.343537	55.2722	cg05862431	NM_032725.2	GeneID:84811	11	116149408	116148914	494	TRUE	11:116148339-116149455
PRAC	1.16305	0.158687	0.355347	57.5387	cg12374721	NM_032391.2	GeneID:84366	17	44154639	44154881	242	TRUE	17:44154292-44154687
TACSTD1	1.16281	0.189731	0.424794	74.7569	cg16076328	NM_002354.1	GeneID:4072	2	47450622	47449971	651	TRUE	2:47449542-47451715
RHOU	1.16158	0.0677315	0.151517	18.9726	cg11431126	NM_021205.4	GeneID:58480	1	226937332	226937492	160	TRUE	1:226937300-226939047
RAMP1	1.15786	0.154793	0.345383	54.9023	cg27567335	NM_005855.2	GeneID:10267	2	238432813	238432926	113	TRUE	2:238432700-238433713
CLMN	1.15485	0.0627332	0.139683	16.7936	cg27508821	NM_024734.2	GeneID:79789	14	94855795	94855955	160	TRUE	14:94855230-94856460
EPIM	1.15193	0.0538633	0.11969	13.4649	cg07057831	NM_194356.1	GeneID:2054	12	129888995	129889764	769	TRUE	12:129888808-129890323
MGC13040	1.15039	0.0786928	0.174677	22.5064	cg20346726	NM_032930.1	GeneID:85016	11	101423613	101423409	204	TRUE	11:101423103-101423893
COL2A1	1.15026	0.158403	0.351583	55.6633	cg19601035	NM_001844.3	GeneID:1280	12	46685407	46684528	879	FALSE
GNG8	1.1454	0.136716	0.302425	45.0814	cg03116238	NM_033258.1	GeneID:94235	19	51829788	51829779	9	TRUE	19:51829585-51830039
SFT2D3	1.14446	0.0725005	0.160272	19.9121	cg01900048	NM_032740.3	GeneID:84826	2	128175202	128175067	135	TRUE	2:128175176-128176549
FLJ10099	1.14236	0.0758706	0.167478	21.0345	cg14702264	NM_017994.3	GeneID:55069	7	66023264	66023669	405	TRUE	7:66023140-66024338
OPRM1	1.14198	0.0691835	0.152677	18.6384	cg14262937	NM_000914.2	GeneID:4988	6	154402044	154402136	92	FALSE
MAPK3	1.13904	0.146362	0.322338	48.6636	cg08966293	NM_002746.1	GeneID:5595	16	30042359	30042039	320	TRUE	16:30041568-30042474
HCN4	1.13787	0.171469	0.377328	60.6364	cg02860342	NM_005477.1	GeneID:10021	15	71448537	71448230	307	TRUE	15:71446780-71449188
AIFL	1.13464	0.0562861	0.123584	13.7589	cg07331806	NM_144704.1	GeneID:150209	22	19649894	19649434	460	TRUE	22:19649062-19649970
ZMYND15	1.13402	0.0890045	0.195337	25.3142	cg18056600	NM_032265.1	GeneID:84225	17	4588796	4590086	1290	TRUE	17:4588563-4590345
RAP1GA1	1.1318	0.166447	0.364738	57.1704	cg07138512	NM_002885.1	GeneID:5909	1	21868904	21868386	518	TRUE	1:21868044-21869076
C1orf85	1.13171	0.07304	0.160044	19.516	cg22377142	NM_144580.1	GeneID:112770	1	154531899	154532073	174	FALSE
SYT9	1.12701	0.112302	0.245276	33.4711	cg08185661	NM_175733.2	GeneID:143425	11	7230074	7229757	317	TRUE	11:7229230-7230968
ACSL6	1.12667	0.0932207	0.203551	26.3847	cg02257405	NM_015256.2	GeneID:23305	5	131374884	131375248	364	TRUE	5:131374645-131375803
AER61	1.1243	0.125647	0.273906	38.4701	cg21785536	NM_173654.1	GeneID:285203	3	69146018	69145464	554	TRUE	3:69144312-69146034
RIPK4	1.12277	0.161365	0.351398	53.445	cg11719297	NM_020639.2	GeneID:54101	21	42060152	42060318	166	TRUE	21:42059152-42060619
TFAP2C	1.12256	0.0657293	0.143114	16.5839	cg02536286	NM_003222.3	GeneID:7022	20	54637765	54637765	0	TRUE	20:54636751-54640473
FLJ13909	1.11831	0.0709445	0.154015	18.2108	cg05832487	NM_025108.1	GeneID:80178	16	2449756	2450147	391	TRUE	16:2449620-2450620
FKBP7	1.11774	0.0730243	0.158468	18.9089	cg03283842	NM_181342.1	GeneID:51661	2	179052049	179051568	481	TRUE	2:179051153-179052346
KIF17	1.11748	0.174222	0.378006	58.9591	cg18486150	NM_020816.1	GeneID:57576	1	20917461	20917097	364	TRUE	1:20916071-20917733
C22orf16	1.11298	0.112997	0.244402	32.6872	cg03290040	NM_213720.1	GeneID:400916	22	22440355	22440141	214	TRUE	22:22439507-22441179
CXCL16	1.11239	0.0887874	0.191962	23.9708	cg19478743	NM_022059.1	GeneID:58191	17	4589396	4589863	467	TRUE	17:4588563-4590345
TRAPPC6A	1.11199	0.139426	0.301361	42.7679	cg02713563	NM_024108.1	GeneID:79090	19	50372788	50373325	537	TRUE	19:50372534-50375107
EVC2	1.10597	0.122947	0.264636	35.8483	cg15305511	NM_147127.2	GeneID:132884	4	5763577	5762176	1401	TRUE	4:5763371-5764499
SOSTDC1	1.10487	0.148037	0.318397	45.5364	cg25533774	NM_015464.1	GeneID:25928	7	16471934	16471999	65	FALSE
RAB11FIP4	1.104	0.0977502	0.210115	26.5612	cg10149836	NM_032932.3	GeneID:84440	17	26743438	26742768	670	TRUE	17:26742064-26743565
FGFR4	1.10069	0.144516	0.309925	43.6472	cg15442702	NM_002011.3	GeneID:2264	5	176446859	176446527	332	TRUE	5:176446178-176447232
IRF6	1.09918	0.0902165	0.193273	23.7206	cg10074409	NM_006147.2	GeneID:3664	1	208046000	208046102	102	TRUE	1:208045524-208046444
ATP5D	1.09744	0.125397	0.268319	36.0313	cg00067471	NM_001687.4	GeneID:513	19	1192377	1192749	372	TRUE	19:1192361-1194023
TNRC4	1.09332	0.198491	0.423507	67.3587	cg26093148	NM_007185.3	GeneID:11189	1	149956699	149955914	785	TRUE	1:149956306-149956727
FGF20	1.09118	0.112322	0.2393	30.7725	cg24030449	NM_019851.1	GeneID:26281	8	16904042	16904045	3	TRUE	8:16903149-16904126
SOX17	1.09075	0.0819482	0.174538	20.5884	cg02919422	NM_022454.2	GeneID:64321	8	55533097	55533048	49	TRUE	8:55532627-55535230
MAL	1.08911	0.118149	0.251355	32.6872	cg06668300	NM_022438.1	GeneID:4118	2	95055482	95055206	276	TRUE	2:95054441-95056349
PRKD1	1.08679	0.1763	0.374464	55.5165	cg21794225	NM_002742.1	GeneID:5587	14	29467215	29466651	564	TRUE	14:29465783-29467306
TBC1D1	1.08303	0.075272	0.159463	18.0625	cg25608041	NM_015173.2	GeneID:23216	4	37568229	37569115	886	TRUE	4:37567883-37569855
HOXD11	1.08182	0.0939056	0.198771	23.9254	cg16632715	NM_021192.2	GeneID:3237	2	176680359	176680330	29	TRUE	2:176679513-176681344
EXTL1	1.08017	0.0667612	0.141152	15.1924	cg04629204	NM_004455.1	GeneID:2134	1	26220912	26220858	54	FALSE
SCN5A	1.07857	0.255557	0.539722	100.048	cg19740375	NM_000335.3	GeneID:6331	3	38665414	38666167	753	TRUE	3:38665243-38666710
NMNAT2	1.07395	0.107187	0.22565	27.7926	cg10202457	NM_015039.2	GeneID:23057	1	181654374	181654360	14	TRUE	1:181652477-181654409
PAX9	1.07005	0.109343	0.229567	28.2118	cg00509670	NM_006194.1	GeneID:5083	14	36200064	36200656	592	TRUE	14:36199815-36200327
CBLN2	1.06927	0.0733907	0.154001	16.8326	cg21902544	NM_182511.2	GeneID:147381	18	68362495	68362542	47	TRUE	18:68361186-68362908
MTDH	1.06589	0.0861267	0.180302	20.6391	cg00265490	NM_178812.2	GeneID:92140	8	98725021	98725583	562	TRUE	8:98724896-98726598
PTGDR	1.06442	0.232688	0.486627	81.0406	cg24989962	NM_000953.2	GeneID:5729	14	51804036	51804181	145	TRUE	14:51803838-51805763
C1orf187	1.06404	0.135988	0.284321	36.8558	cg13796218	NM_198545.2	GeneID:374946	1	11673250	11674373	1123	TRUE	1:11673114-11675342
C14orf24	1.0623	0.085461	0.178465	20.2466	cg24733384	NM_173607.2	GeneID:283635	14	34586034	34585320	714	TRUE	14:34584846-34586137
DMC1	1.0606	0.0735092	0.153325	16.5399	cg20120491	NM_007068.2	GeneID:11144	22	37295880	37296135	255	TRUE	22:37295484-37296809
TUBA1	1.05892	0.0624069	0.130017	13.1254	cg01693157	NM_006000.1	GeneID:7277	2	219826517	219826882	365	TRUE	2:219825757-219827741
YWHAH	1.0502	0.0675349	0.139853	14.3025	cg22478328	NM_003405.3	GeneID:7533	22	30670140	30670479	339	TRUE	22:30669843-30671638
RGS7	1.04934	0.075287	0.155813	16.5872	cg21303386	NM_002924.2	GeneID:6000	1	239586934	239587101	167	TRUE	1:239586193-239587613
BIN1	1.03955	0.107492	0.220959	25.6209	cg25228746	NM_004305.2	GeneID:274	2	127581849	127581334	515	TRUE	2:127580072-127581866
SH3GL2	1.03819	0.0816778	0.167738	17.9819	cg17398595	NM_003026.1	GeneID:6456	9	17568725	17569194	469	TRUE	9:17568653-17569949
RFC1	1.0349	0.0886771	0.181697	19.8184	cg12062995	NM_002913.3	GeneID:5981	4	39044607	39044390	217	TRUE	4:39043842-39045080
USH1C	1.03474	0.0890867	0.182516	19.9229	cg21289015	NM_005709.2	GeneID:10083	11	17522624	17522539	85	TRUE	11:17522276-17523297
ZNF235	1.03456	0.0678759	0.139043	13.8354	cg27541515	NM_004234.3	GeneID:9310	19	49500636	49501010	374	TRUE	19:49500591-49501187
PNPLA5	1.03184	0.168852	0.345241	45.4089	cg03118854	NM_138814.2	GeneID:150379	22	42619488	42619190	298	TRUE	22:42618620-42619563
PPIL5	1.0309	0.0762333	0.155767	16.063	cg13892015	NM_152329.3	GeneID:122769	14	49134806	49135165	359	TRUE	14:49134569-49136807
REEP1	1.02994	0.0924239	0.188724	20.6529	cg02870945	NM_022912.1	GeneID:65055	2	86418635	86418288	347	TRUE	2:86417394-86418655
KCNK4	1.02786	0.296112	0.603773	116.689	cg01352108	NM_016611.2	GeneID:50801	11	63815454	63815451	3	TRUE	11:63815450-63816817
SCN4B	1.02772	0.109533	0.223317	25.4599	cg17186803	NM_174934.1	GeneID:6330	11	117528248	117528747	499	FALSE
RHCG	1.02653	0.108528	0.221084	25.0868	cg24653181	NM_016321.1	GeneID:51458	15	87840586	87840803	217	TRUE	15:87840274-87841084
KIAA0020	1.02501	0.116012	0.23608	27.2152	cg24471894	NM_014878.3	GeneID:9933	9	2828508	2828507	1	FALSE
RAC2	1.01709	0.136818	0.276897	32.9898	cg18265887	NM_002872.3	GeneID:5880	22	35970196	35970251	55	TRUE	22:35970109-35970351
C1orf104	1.01679	0.13607	0.275325	32.7512	cg10057065	NM_173639.1	GeneID:284618	1	153558851	153557959	892	TRUE	1:153558675-153562005
GATA4	1.01414	0.100505	0.20299	22.0758	cg21073927	NM_002052.2	GeneID:2626	8	11599564	11599162	402	TRUE	8:11598711-11600557
DTNB	1.01348	0.104963	0.211896	23.2865	cg06980380	NM_183360.1	GeneID:1838	2	25750429	25750007	422	TRUE	2:25749037-25750685
CDKN2B	1.0043	0.151064	0.303031	36.3565	cg10210238	NT_008413.17	GeneID:1030	9	21995995			TRUE	9:21995095-21996291
PACSIN1	1.00409	0.132738	0.26623	30.6623	cg23239444	NM_020804.2	GeneID:29993	6	34541298	34541883	585	TRUE	6:34541252-34542377
PPP1CA	1.00084	0.176184	0.352573	44.4267	cg13055001	NM_002708.3	GeneID:5499	11	66926389	66925952	437	TRUE	11:66925372-66926634
FOXE3	0.993386	0.0710948	0.141539	13.2087	cg18815943	NM_012186.1	GeneID:2301	1	47654901	47654331	570	TRUE	1:47654351-47655785
KCNA6	0.991252	0.0885718	0.176073	17.6811	cg26162582	NM_002235.2	GeneID:3742	12	4788652	4788603	49	TRUE	12:4788356-4789953
AGPAT6	0.989265	0.113888	0.226087	24.2253	cg09915099	NM_178819.2	GeneID:137964	8	41554458	41554876	418	TRUE	8:41554322-41555399
HSU79303	0.988481	0.173168	0.343582	41.9539	cg12582959	NM_013301.1	GeneID:29903	19	60851011	60851213	202	TRUE	19:60850950-60851849
KRT7	0.987487	0.235286	0.466508	66.5809	cg07007400	NM_005556.3	GeneID:3855	12	50913098	50913221	123	TRUE	12:50912973-50913926
SLC16A5	0.984761	0.2074	0.410442	53.9722	cg09300114	NM_004695.2	GeneID:9121	17	70595924	70595650	274	TRUE	17:70595284-70595964
FLJ12056	0.983648	0.103335	0.204342	21.1146	cg18006568	NM_024933.2	GeneID:79998	2	71059399	71059083	316	TRUE	2:71058922-71060108
CCL26	0.983646	0.215534	0.426209	57.1704	cg12943082	NM_006072.4	GeneID:10344	7	75257247	75257000	247	FALSE
PCDHGB7	0.98164	0.109926	0.217071	22.7228	cg14011639	NM_018927.2	GeneID:56099	5	140777418	140777466	48	TRUE	5:140777221-140777959
CRIP1	0.979456	0.120913	0.238406	25.4808	cg04411625	NM_001311.3	GeneID:1396	14	105024507	105024594	87	TRUE	14:105023580-105025363
C15orf27	0.979223	0.0985473	0.194276	19.6499	cg27321979	NM_152335.1	GeneID:123591	15	74139587	74139354	233	TRUE	15:74138315-74139603
GRB7	0.978559	0.212054	0.417851	54.9023	cg17740645	NM_005310.2	GeneID:2886	17	35147939	35147713	226	FALSE
MAPK12	0.974602	0.157346	0.3092	35.5097	cg21974239	NM_002969.3	GeneID:6300	22	49042605	49042216	389	TRUE	22:49041517-49042644
IGF2	0.970755	0.137429	0.269343	29.3754	cg20339650	NM_000612.2	GeneID:3481	11	2117458	2116578	880	TRUE	11:2115427-2119259
ZNF530	0.970746	0.126401	0.247728	26.3515	cg23854009	NM_020880.2	GeneID:348327	19	62802940	62803065	125	TRUE	19:62802892-62803688
SLC30A2	0.970027	0.0960037	0.188059	18.5674	cg05674944	NM_001004434.1	GeneID:7780	1	26244877	26245191	314	TRUE	1:26244727-26245945
WHSC2	0.967524	0.143541	0.280691	30.7991	cg14217157	NM_005663.2	GeneID:7469	4	1981675	1980547	1128	TRUE	4:1979437-1982166
KCND1	0.965799	0.0916671	0.179039	17.2492	cg06526829	NM_004979.4	GeneID:3750	X	48713014	48713195	181	FALSE
KCNB2	0.953896	0.100946	0.195543	18.9538	cg20890210	NM_004770.2	GeneID:9312	8	73612735	73612180	555	TRUE	8:73611127-73612795
ADCY4	0.950216	0.11873	0.229405	23.0395	cg12265829	NM_139247.2	GeneID:196883	14	23873862	23873704	158	TRUE	14:23873382-23874334
IHH	0.94763	0.103209	0.199059	19.1405	cg25908985	NM_002181.1	GeneID:3549	2	219633309	219633433	124	TRUE	2:219632914-219634448
SENP6	0.947269	0.105561	0.203544	19.6836	cg08222514	NM_015571.1	GeneID:26054	6	76369098	76368961	137	TRUE	6:76367925-76369412
MAN1C1	0.946038	0.117692	0.226743	22.5435	cg04631202	NM_020379.1	GeneID:57134	1	25815047	25816546	1499	TRUE	1:25814952-25817489
CCL26	0.945575	0.204279	0.393432	47.2193	cg05556717	NM_006072.4	GeneID:10344	7	75257240	75257000	240	FALSE
MGC4562	0.944539	0.176409	0.339511	38.2135	cg12623088	NM_133375.2	GeneID:115752	15	64372575	64372714	139	TRUE	15:64372523-64373654
C3orf52	0.943031	0.0993527	0.191012	18.0019	cg05570980	NM_024616.1	GeneID:79669	3	113287673	113287929	256	TRUE	3:113287406-113288434
GCH1	0.941031	0.0845266	0.162283	14.408	cg01838317	NM_000161.2	GeneID:2643	14	54439611	54439292	319	TRUE	14:54438128-54439747
NPTX2	0.939973	0.18917	0.36292	41.5771	cg12799895	NM_002523.1	GeneID:4885	7	98084588	98084545	43	TRUE	7:98083575-98085970
TP73	0.939139	0.111301	0.213407	20.6142	cg16741710	NM_005427.1	GeneID:7161	1	3559246	3558989	257	TRUE	1:3556965-3559547
ETV7	0.938638	0.117028	0.22431	21.9356	cg04289385	NM_016135.2	GeneID:51513	6	36463803	36463445	358	TRUE	6:36462816-36464072
TEKT1	0.936276	0.248213	0.474977	62.6931	cg12685753	NM_053285.1	GeneID:83659	17	6676263	6675784	479	TRUE	17:6675613-6676326
PSD3	0.93261	0.230789	0.440512	54.9632	cg24056567	NM_015310.2	GeneID:23362	8	18916189	18915476	713	TRUE	8:18915099-18916495
MOSC1	0.932468	0.164259	0.313495	33.4571	cg07185695	NM_022746.2	GeneID:64757	1	219026209	219026894	685	TRUE	1:219026119-219026425
UBXD3	0.930431	0.0974245	0.185676	16.9034	cg06911113	NM_152376.2	GeneID:127733	1	20385204	20385165	39	TRUE	1:20384918-20385413
SLC10A4	0.930041	0.160692	0.306171	32.2818	cg08209133	NM_152679.2	GeneID:201780	4	48180381	48180206	175	TRUE	4:48179835-48181422
TMEM80	0.929204	0.121533	0.231425	22.4386	cg16614500	NM_174940.1	GeneID:283232	11	684704	685643	939	TRUE	11:684347-686446
TACSTD1	0.924238	0.142463	0.270349	27.0949	cg07059875	NM_002354.1	GeneID:4072	2	47449577	47449971	394	TRUE	2:47449542-47451715
EFHA1	0.923523	0.151488	0.287334	29.3076	cg08163803	NM_152726.1	GeneID:221154	13	21076600	21076309	291	TRUE	13:21075626-21076603
HCP5	0.923476	0.144011	0.273143	27.4	cg13784557	NM_006674.2	GeneID:10866	6	31538895	31538938	43	TRUE	6:31538727-31539202
C10orf107	0.918063	0.0920292	0.173896	15.0994	cg16063112	NM_173554.1	GeneID:219621	10	63093085	63092725	360	TRUE	10:63092414-63093183
KCNC3	0.91762	0.106727	0.201606	18.405	cg06572160	NM_004977.2	GeneID:3748	19	55523713	55524446	733	TRUE	19:55522929-55526307
TSLP	0.916812	0.232275	0.438522	52.978	cg15089387	NM_033035.3	GeneID:85480	5	110434560	110435289	729	TRUE	5:110433764-110434674
OSTM1	0.916258	0.153279	0.289269	29.1611	cg21769969	NM_014028.3	GeneID:28962	6	108503191	108502634	557	TRUE	6:108502055-108503715
MRPL12	0.914439	0.0971484	0.183109	16.0998	cg17161537	NM_002949.2	GeneID:6182	17	77281338	77280812	526	TRUE	17:77279932-77281470
FKBP10	0.912706	0.161899	0.304787	31.0263	cg21416237	NM_021939.2	GeneID:60681	17	37223617	37222727	890	FALSE
LOC201164	0.909741	0.155432	0.292011	29.1611	cg02880176	NM_178836.2	GeneID:201164	17	17050542	17050357	185	TRUE	17:17049380-17050976
CXCL2	0.906612	0.0992938	0.18614	16.1951	cg16890267	NM_002089.1	GeneID:2920	4	75183479	75183776	297	TRUE	4:75183138-75184257
NULP1	0.901249	0.10423	0.194668	16.9827	cg01161216	NM_014972.1	GeneID:22980	16	88466949	88467527	578	TRUE	16:88466609-88468601
SNRPN	0.898824	0.263592	0.491479	62.1119	cg22678136	NT_026446.13	GeneID:6638	15	22644614			TRUE	15:22644176-22644728
RAB15	0.897169	0.241653	0.450057	53.2578	cg14944269	NM_198686.1	GeneID:376267	14	64509355	64508551	804	FALSE
HLX1	0.895656	0.22409	0.41691	46.976	cg13170032	NM_021958.2	GeneID:3142	1	219118766	219119382	616	TRUE	1:219118429-219120558
ETV7	0.894541	0.110424	0.205281	17.9864	cg05216141	NM_016135.2	GeneID:51513	6	36462938	36463445	507	TRUE	6:36462816-36464072
PDE9A	0.894456	0.0930397	0.172952	14.3154	cg00516481	NM_002606.2	GeneID:5152	21	42946271	42946931	660	TRUE	21:42946154-42947773
GAS8	0.893511	0.178617	0.331816	33.5273	cg15936718	NM_001481.1	GeneID:2622	16	88616302	88616509	207	TRUE	16:88616246-88616821
KCNE3	0.893262	0.168019	0.312073	30.8286	cg23189044	NM_005472.3	GeneID:10008	11	73855762	73856186	424	TRUE	11:73855641-73856427
HCFC1R1	0.892025	0.120656	0.223912	19.9824	cg02062650	NM_001002017.1	GeneID:54985	16	3014538	3014288	250	TRUE	16:3013862-3014613
GABRA4	0.890424	0.126597	0.234675	21.1467	cg16358826	NM_000809.2	GeneID:2557	4	46691021	46690337	684	TRUE	4:46690835-46691057
CD4	0.889619	0.0954558	0.17685	14.59	cg22908581	NM_000616.2	GeneID:920	12	6769236	6769005	231	FALSE
ZNF274	0.889233	0.218399	0.404518	44.3486	cg00647741	NM_016324.2	GeneID:10782	19	63385262	63386208	946	FALSE
NAGA	0.889057	0.0880139	0.162999	13.104	cg27187881	NM_000262.1	GeneID:4668	22	40796291	40796719	428	TRUE	22:40796208-40797317
BCL7B	0.886538	0.220812	0.408222	44.7083	cg05386606	NM_001707.2	GeneID:9275	7	72610215	72609960	255	TRUE	7:72609207-72610295
C16orf48	0.886192	0.0940493	0.17383	14.1874	cg06637893	NM_032140.1	GeneID:84080	16	66258461	66258129	332	TRUE	16:66257367-66258718
INHBE	0.885975	0.348643	0.644296	105.462	cg20664201	NM_031479.3	GeneID:83729	12	56135537	56135363	174	FALSE
CGI-38	0.885024	0.238191	0.43989	50.1736	cg18107072	NM_016140.2	GeneID:51673	16	65985312	65984922	390	TRUE	16:65984642-65986631
ELF5	0.884069	0.222828	0.411245	44.9959	cg12728032	NM_001422.2	GeneID:2001	11	34491933	34491906	27	TRUE	11:34491755-34491993
LRRC61	0.880734	0.137598	0.253362	22.8863	cg21516287	NM_023942.1	GeneID:65999	7	149651788	149651538	250	TRUE	7:149650764-149651993
C1QR1	0.880451	0.128583	0.236715	20.9714	cg21023001	NM_012072.2	GeneID:22918	20	23015088	23014977	111	TRUE	20:23014996-23015197
NMNAT3	0.877158	0.178098	0.327122	31.8552	cg15878317	NM_178177.2	GeneID:349565	3	140879472	140879530	58	TRUE	3:140878839-140879756
ACLY	0.877041	0.129	0.236923	20.8525	cg25687894	NM_001096.2	GeneID:47	17	37329242	37328798	444	TRUE	17:37327760-37329373
CCDC37	0.874802	0.138429	0.253846	22.6704	cg00891278	NM_182628.1	GeneID:348807	3	127596474	127596472	2	TRUE	3:127595793-127596808
F3	0.872416	0.106825	0.195567	16.1071	cg01185754	NM_001993.2	GeneID:2152	1	94779317	94779903	586	TRUE	1:94778962-94780728
B4GALT6	0.870843	0.101572	0.185748	14.9648	cg02930996	NM_004775.2	GeneID:9331	18	27519840	27518626	1214	TRUE	18:27518086-27520052
GPR75	0.870726	0.143598	0.26258	23.4871	cg19664945	NM_006794.1	GeneID:10936	2	53940847	53940572	275	TRUE	2:53940114-53941112
CDH1	0.870268	0.110147	0.201349	16.6642	cg24765079	NT_010498.15	GeneID:999	16	67329931			TRUE	16:67328348-67330000
LOC389458	0.867817	0.114244	0.208483	17.3551	cg01870826	NM_203393.1	GeneID:389458	7	5078401	5078258	143	TRUE	7:5078039-5078627
PCDH8	0.867328	0.124079	0.226355	19.2759	cg20366906	NM_032949.1	GeneID:5100	13	52320382	52320775	393	TRUE	13:52317356-52321012
DRD2	0.862245	0.11955	0.217325	18.1078	cg12758687	NM_016574.2	GeneID:1813	11	112851537	112851091	446	TRUE	11:112850124-112851649
THSD3	0.861948	0.0986213	0.179243	14.0361	cg07965823	NM_182509.2	GeneID:145501	14	77034465	77034912	447	TRUE	14:77034200-77035952
RPL39L	0.85751	0.127864	0.231678	19.4483	cg07693270	NM_052969.1	GeneID:116832	3	188339622	188339957	335	TRUE	3:188339213-188340495
MYO1B	0.852935	0.244152	0.44098	47.1974	cg15096140	NM_012223.2	GeneID:4430	2	191817976	191818375	399	TRUE	2:191817926-191819459
C20orf195	0.8525	0.115014	0.207673	16.7003	cg06661994	NM_024059.2	GeneID:79025	20	61654807	61654817	10	FALSE
NADSYN1	0.845809	0.28534	0.512834	60.6364	cg20728496	NM_018161.4	GeneID:55191	11	70841203	70841865	662	TRUE	11:70841005-70842753
PKP2	0.844161	0.118334	0.212435	16.8772	cg01851399	NM_004572.2	GeneID:5318	12	32941484	32940993	491	TRUE	12:32940472-32941602
GALNT12	0.843722	0.247454	0.4441	46.8516	cg05593325	NM_024642.2	GeneID:79695	9	100609517	100609802	285	TRUE	9:100609494-100610687
CPXM2	0.842941	0.242464	0.434909	45.2234	cg09619146	NM_198148.1	GeneID:119587	10	125641024	125641490	466	TRUE	10:125640686-125641562
ACSS1	0.841349	0.175185	0.313884	27.9192	cg15988792	NM_032501.2	GeneID:84532	20	24987314	24987616	302	FALSE
RALBP1	0.839638	0.248782	0.445221	46.6497	cg15982419	NM_006788.3	GeneID:10928	18	9464707	9465530	823	TRUE	18:9464394-9466093
CRX	0.836585	0.156328	0.279174	23.6583	cg19762747	NM_000554.2	GeneID:1406	19	53016901	53016976	75	FALSE
ST6GALNAC2	0.834892	0.119855	0.213787	16.6896	cg08666623	NM_006456.1	GeneID:10610	17	72094278	72093524	754	FALSE
HOXC10	0.834295	0.117138	0.208856	16.1619	cg08900043	NM_017409.2	GeneID:3226	12	52665163	52665221	58	TRUE	12:52664872-52666801
UQCRB	0.833883	0.110487	0.19694	14.9104	cg22313024	NM_006294.2	GeneID:7381	8	97317245	97316987	258	TRUE	8:97316672-97317247
CDC42EP3	0.829672	0.157661	0.280208	23.4277	cg05469695	NM_006449.3	GeneID:10602	2	37753457	37752830	627	TRUE	2:37751521-37753482
COL11A1	0.82848	0.124507	0.221101	17.1949	cg12884406	NM_001854.2	GeneID:1301	1	103346577	103346640	63	TRUE	1:103346095-103346585
STK32C	0.827891	0.105444	0.187172	13.7993	cg07284558	NM_173575.2	GeneID:282974	10	133972411	133971467	944	TRUE	10:133970400-133972595
IRX2	0.827532	0.104412	0.185294	13.6123	cg26504021	NM_033267.2	GeneID:153572	5	2805882	2804769	1113	TRUE	5:2801201-2806084
PCSK1	0.824658	0.20504	0.36315	33.0444	cg09786257	NM_000439.3	GeneID:5122	5	95794451	95794708	257	TRUE	5:95794255-95794915
VWA2	0.824293	0.18253	0.3232	28.0029	cg13084429	NM_198496.1	GeneID:340706	10	115989011	115989008	3	TRUE	10:115988849-115989771
SPINT1	0.82328	0.164722	0.291463	24.3073	cg04868764	NM_181642.2	GeneID:6692	15	38924311	38923538	773	TRUE	15:38922947-38924700
FHIT	0.822237	0.111958	0.197957	14.6195	cg19574488	NM_002012.1	GeneID:2272	3	61211587	61212164	577	TRUE	3:61211519-61212421
TNFRSF18	0.819323	0.336428	0.593653	76.9913	cg14886269	NM_004195.2	GeneID:8784	1	1131790	1131952	162	TRUE	1:1131403-1132105
PRLHR	0.81929	0.201791	0.356067	31.7615	cg15748507	NM_004248.1	GeneID:2834	10	120344617	120344746	129	TRUE	10:120343551-120346241
XK	0.818017	0.180566	0.318335	27.0872	cg08902818	NM_021083.2	GeneID:7504	X	37429724	37430052	328	TRUE	X:37429528-37430511
PRDM15	0.817709	0.229504	0.404525	38.2809	cg21241823	NM_022115.2	GeneID:63977	21	42173093	42172660	433	TRUE	21:42171521-42173135
CA5B	0.815873	0.254049	0.447219	44.7022	cg25376316	NM_007220.2	GeneID:11238	X	15666635	15666346	289	TRUE	X:15665820-15666693
AATF	0.812729	0.115371	0.202653	14.7571	cg11857445	NM_012138.3	GeneID:26574	17	32380018	32380288	270	TRUE	17:32379737-32381014
RALGDS	0.812379	0.209754	0.36835	32.871	cg06974755	NM_006266.2	GeneID:5900	9	134986752	134986382	370	TRUE	9:134985740-134986902
TMEM9	0.8104	0.137687	0.241461	18.5411	cg21431091	NM_016456.2	GeneID:252839	1	199390648	199390243	405	TRUE	1:199389815-199390754
ZIC1	0.809255	0.238684	0.418248	39.6267	cg14456683	NM_003412.3	GeneID:7545	3	148609700	148609871	171	TRUE	3:148609249-148612068
PSMA7	0.80732	0.14324	0.250665	19.2853	cg08833432	NM_002792.2	GeneID:5688	20	60153219	60151869	1350	FALSE
CDKN2A	0.801942	0.18594	0.324177	26.7697	cg11653709	NT_008413.17	GeneID:1029	9	21958146			TRUE	9:21958106-21958899
KCNS2	0.799447	0.172047	0.299437	23.8995	cg05373457	NM_020697.2	GeneID:3788	8	99509124	99508426	698	TRUE	8:99507518-99509796
LOC126208	0.797366	0.170134	0.295679	23.4047	cg06161930	NM_001002836.1	GeneID:126208	19	61325003	61324461	542	TRUE	19:61323502-61325010
GMPR	0.796429	0.164662	0.285985	22.376	cg25457331	NM_006877.2	GeneID:2766	6	16346526	16346790	264	TRUE	6:16346040-16347637
C6orf118	0.795022	0.110628	0.191951	13.2112	cg02064106	NM_144980.1	GeneID:168090	6	165642848	165643088	240	TRUE	6:165642419-165642983
FBXO27	0.794237	0.196571	0.340886	28.1894	cg02197293	NM_178820.3	GeneID:126433	19	44214998	44215038	40	TRUE	19:44214012-44215404
NUDT8	0.792444	0.161278	0.279334	21.46	cg13631259	NM_181843.1	GeneID:254552	11	67153421	67153977	556	TRUE	11:67152961-67155262
PENK	0.791565	0.11654	0.201724	13.9828	cg04598121	NM_006211.2	GeneID:5179	8	57521059	57521143	84	TRUE	8:57520521-57522710
LEP	0.791531	0.21111	0.365412	30.9626	cg12782180	NM_000230.1	GeneID:3952	7	127668168	127668567	399	TRUE	7:127667928-127668724
DAZAP1	0.791386	0.377059	0.65259	90.6651	cg06341721	NM_018959.2	GeneID:26528	19	1357759	1358584	825	TRUE	19:1357198-1360039
WHSC1L1	0.787708	0.144231	0.24899	18.297	cg25510610	NM_023034.1	GeneID:54904	8	38360051	38358947	1104	TRUE	8:38358099-38360064
MST1R	0.783295	0.227792	0.392042	33.7261	cg03332271	NM_002447.1	GeneID:4486	3	49916155	49916074	81	TRUE	3:49915736-49916551
HOXA9	0.780973	0.171442	0.294587	22.4581	cg01381846	NM_152739.2	GeneID:3205	7	27171310	27171674	364	TRUE	7:27170287-27173690
ALDH1A3	0.780785	0.295598	0.507857	51.7199	cg27652350	NT_035325.6	GeneID:220	15	99238512			TRUE	15:99236455-99238833
RNUT1	0.777215	0.191373	0.327979	25.7111	cg20630655	NM_005701.2	GeneID:10073	15	73705755	73705132	623	FALSE
RAB11FIP4	0.777174	0.204587	0.350616	28.1973	cg04764624	NM_032932.3	GeneID:84440	17	26742255	26742768	513	TRUE	17:26742064-26743565
MSX1	0.775453	0.262712	0.449691	41.2803	cg20161179	NT_006051.17	GeneID:4487	4	4914183			TRUE	4:4913563-4914786
SEPT10	0.773179	0.284527	0.486265	46.8973	cg03552103	NM_178584.1	GeneID:151011	2	109730291	109729072	1219	TRUE	2:109728093-109730817
CNTROB	0.773095	0.319823	0.546555	58.6062	cg25011395	NM_053051.1	GeneID:116840	17	7775332	7776262	930	TRUE	17:7775260-7775583
RASSF5	0.772914	0.165799	0.283304	20.8962	cg10167296	NM_031437.1	GeneID:83593	1	204747251	204747502	251	TRUE	1:204746730-204748150
SLC15A3	0.772716	0.224384	0.383356	31.8382	cg21992250	NM_016582.1	GeneID:51296	11	60475285	60475833	548	TRUE	11:60474677-60476063
NPAS4	0.768711	0.214367	0.365226	29.3604	cg22134325	NM_178864.2	GeneID:266743	11	65945321	65945051	270	TRUE	11:65944577-65946304
C10orf10	0.766102	0.332886	0.566129	61.9479	cg04444771	NM_007021.2	GeneID:11067	10	44793718	44794263	545	FALSE
KIAA1838	0.765389	0.209394	0.355934	28.0226	cg26200580	NM_032448.1	GeneID:84498	6	170457198	170457769	571	TRUE	6:170457028-170458319
TCF2	0.764635	0.249252	0.423464	36.436	cg12788467	NM_000458.1	GeneID:6928	17	33179448	33179182	266	TRUE	17:33179383-33179763
FLJ46831	0.763748	0.21928	0.372314	29.8323	cg13929328	NM_207426.1	GeneID:399823	10	129425888	129425942	54	TRUE	10:129424072-129426344
GCAT	0.762592	0.151023	0.256215	17.8854	cg11368946	NM_014291.2	GeneID:23464	22	36534337	36533901	436	TRUE	22:36533345-36534339
CHRDL1	0.761106	0.128477	0.217742	14.3306	cg12485020	NM_145234.2	GeneID:91851	X	109925925	109925649	276	TRUE	X:109925492-109926221
GNAI2	0.759725	0.159946	0.270815	19.0746	cg15972294	NM_002070.2	GeneID:2771	3	50248100	50248651	551	TRUE	3:50247648-50249014
DYRK3	0.759438	0.269978	0.457028	40.8879	cg09328024	NM_003582.2	GeneID:8444	1	204874797	204875504	707	TRUE	1:204874697-204876310
BNIP2	0.756866	0.166047	0.280589	19.8404	cg20468883	NM_004330.1	GeneID:663	15	57769688	57768778	910	FALSE
NIFIE14	0.755405	0.285395	0.481777	44.328	cg00739120	NM_032635.2	GeneID:10430	19	40727715	40728385	670	TRUE	19:40727497-40728997
C11orf52	0.753372	0.303629	0.511836	49.2996	cg05697249	NM_080659.1	GeneID:91894	11	111294903	111294847	56	FALSE
ADAMTS18	0.751825	0.127523	0.214739	13.778	cg20807545	NM_139054.2	GeneID:170692	16	76027039	76026512	527	TRUE	16:76025670-76027234
UBE2D4	0.750406	0.188689	0.317426	23.0434	cg15262984	NM_015983.2	GeneID:51619	7	43932173	43932572	399	TRUE	7:43932157-43933072
SOX14	0.749207	0.147645	0.248172	16.5634	cg03811478	NM_004189.2	GeneID:8403	3	138966386	138966269	117	TRUE	3:138964433-138967163
ZNF287	0.746475	0.240182	0.402952	32.2599	cg03565323	NM_020653.1	GeneID:57336	17	16413591	16413189	402	TRUE	17:16412567-16413671
FLJ13639	0.741746	0.359913	0.601846	66.9199	cg05600717	NM_024705.1	GeneID:79758	13	51276745	51276294	451	TRUE	13:51275477-51276869
WDR52	0.736762	0.264896	0.441432	36.4473	cg15044041	NM_018338.2	GeneID:55779	3	114643003	114643030	27	TRUE	3:114642854-114643339
CDH15	0.73576	0.232387	0.386988	29.5187	cg11386746	NM_004933.2	GeneID:1013	16	87764871	87765664	793	TRUE	16:87764778-87765944
ZBTB8	0.735583	0.163348	0.271986	18.0625	cg11619390	NM_144621.2	GeneID:127557	1	32703766	32703245	521	TRUE	1:32702497-32703962
SLC13A5	0.733739	0.147	0.244452	15.5585	cg16652063	NM_177550.2	GeneID:284111	17	6557377	6557388	11	TRUE	17:6556978-6558390
DDHD1	0.73367	0.200904	0.334076	23.7161	cg18555117	NM_030637.1	GeneID:80821	14	52690151	52689750	401	FALSE
GPI	0.731633	0.202647	0.336499	23.8231	cg26986236	NM_000175.2	GeneID:2821	19	39547555	39547909	354	TRUE	19:39547487-39548830
ICA1	0.726343	0.200897	0.332371	23.1263	cg10798171	NM_022307.1	GeneID:3382	7	8268826	8268682	144	TRUE	7:8267385-8268892
SOX2	0.725112	0.195903	0.323833	22.2606	cg15105987	NM_003106.2	GeneID:6657	3	182913011	182912416	595	TRUE	3:182911974-182913948
FAM57B	0.722281	0.367741	0.606695	65.0422	cg13271951	NM_031478.3	GeneID:83723	16	29949261	29949405	144	FALSE
SLC2A14	0.720773	0.16347	0.26941	17.1506	cg05521696	NM_153449.2	GeneID:144195	12	7916762	7916762	0	TRUE	12:7916455-7917428
ARMCX2	0.718775	0.192649	0.317059	21.238	cg22343001	NM_177949.1	GeneID:9823	X	100801504	100801491	13	TRUE	X:100801100-100801653
HOXA4	0.715737	0.268208	0.440484	34.4837	cg24169822	NM_002141.2	GeneID:3201	7	27137519	27136924	595	TRUE	7:27136060-27137536
PPM1M	0.709283	0.143438	0.23452	13.8105	cg20276750	NM_144641.1	GeneID:132160	3	52254595	52255226	631	TRUE	3:52254412-52255338
SURF4	0.708118	0.445632	0.728016	101.453	cg22244122	NM_033161.2	GeneID:6836	9	135233519	135232791	728	TRUE	9:135232028-135233521
POU4F2	0.705734	0.144869	0.236278	13.811	cg13262687	NM_004575.1	GeneID:5458	4	147779029	147779538	509	TRUE	4:147778503-147781596
TTC3	0.705658	0.144803	0.236157	13.8026	cg21832243	NM_003316.3	GeneID:7267	21	37366093	37367441	1348	FALSE
PRLH	0.70117	0.280295	0.455711	35.1985	cg11380128	NM_015893.1	GeneID:51052	2	238138539	238139956	1417	FALSE
ZNF238	0.700135	0.149884	0.24351	14.1566	cg02497700	NM_006352.3	GeneID:10472	1	242279981	242281208	1227	TRUE	1:242277547-242280317
ANKRD13C	0.69748	0.224554	0.364152	24.3906	cg19342782	NM_030816.2	GeneID:81573	1	70594394	70592993	1401	FALSE
ARHGEF7	0.696431	0.14381	0.233042	13.2202	cg16427670	NM_003899.2	GeneID:8874	13	110564903	110565783	880	TRUE	13:110564691-110566860
COL19A1	0.693812	0.219733	0.35543	23.3657	cg06321883	NM_001858.4	GeneID:1310	6	70633262	70633169	93	TRUE	6:70633025-70633404
CHFR	0.693803	0.458629	0.741852	103.926	cg20535781	NT_024477.13	GeneID:55743	12	131975086			TRUE	12:131973620-131975130
TACSTD2	0.689854	0.27607	0.445335	32.8362	cg27398499	NM_002353.1	GeneID:4070	1	58816461	58816033	428	FALSE
PGCP	0.689018	0.246017	0.396625	27.162	cg11536940	NM_016134.2	GeneID:10404	8	97727252	97726675	577	TRUE	8:97726093-97727293
WNK2	0.687925	0.213672	0.344218	21.9666	cg16158807	NM_006648.3	GeneID:65268	9	94986712	94987033	321	TRUE	9:94985882-94988045
ADPRHL1	0.685704	0.45444	0.730961	98.0859	cg14845091	NM_199162.1	GeneID:113622	13	113155957	113155840	117	TRUE	13:113155952-113156321
SOX21	0.68432	0.181971	0.292417	17.3463	cg11208483	NM_007084.2	GeneID:11166	13	94162234	94162390	156	TRUE	13:94160973-94164117
TMEM42	0.682303	0.383995	0.616196	61.2404	cg16615211	NM_144638.1	GeneID:131616	3	44877937	44878412	475	TRUE	3:44877538-44879065
CCDC8	0.679498	0.464128	0.74334	101.254	cg11715966	NM_032040.1	GeneID:83987	19	51609095	51608681	414	TRUE	19:51607022-51609496
MYBL2	0.679018	0.376182	0.602285	57.5501	cg23843505	NM_002466.2	GeneID:4605	20	41728834	41729123	289	TRUE	20:41728220-41729819
MINA	0.676257	0.348526	0.55694	48.0939	cg04845628	NM_032778.3	GeneID:84864	3	99173380	99173621	241	TRUE	3:99173310-99174219
RASSF1	0.675614	0.191346	0.305633	17.9871	cg00777121	NM_007182.4	GeneID:11186	3	50353195	50353371	176	TRUE	3:50352707-50353696
IL15	0.675397	0.190778	0.30468	17.9178	cg25546588	NM_000585.2	GeneID:3600	4	142776841	142777204	363	TRUE	4:142776728-142778075
TNK1	0.675059	0.180756	0.288607	16.5889	cg18632631	NM_003985.1	GeneID:8711	17	7224773	7225134	361	TRUE	17:7224715-7225512
NXPH3	0.674242	0.179627	0.286641	16.4143	cg06405206	NM_007225.1	GeneID:11248	17	45007803	45008478	675	TRUE	17:45007709-45009511
GALR1	0.673824	0.238138	0.379901	24.3556	cg00662556	NT_025004.13	GeneID:2587	18	73092352			TRUE	18:73090255-73093032
FLJ37587	0.67365	0.441797	0.704711	85.3697	cg26292028	NM_173597.1	GeneID:283446	12	108363111	108362755	356	FALSE
SNX15	0.671805	0.214393	0.341543	20.7808	cg03101664	NM_013306.3	GeneID:29907	11	64551186	64551486	300	TRUE	11:64551150-64552035
HOXB8	0.670673	0.390521	0.621638	60.8027	cg15539420	NM_024016.2	GeneID:3218	17	44047247	44047300	53	TRUE	17:44046403-44047788
PGLYRP1	0.669683	0.392329	0.624088	61.1706	cg02806777	NM_005091.1	GeneID:8993	19	51218157	51218163	6	TRUE	19:51217863-51218220
TMC4	0.667661	0.338387	0.537526	43.6921	cg25736482	NM_144686.1	GeneID:147798	19	59369044	59368664	380	TRUE	19:59368866-59369172
CBFB	0.66636	0.192126	0.304916	17.4551	cg06766367	NM_001755.2	GeneID:865	16	65620188	65620551	363	TRUE	16:65619963-65621646
MLNR	0.665599	0.253301	0.401792	25.9606	cg02620013	NM_001507.1	GeneID:2862	13	48692682	48692475	207	TRUE	13:48691941-48693636
L3MBTL	0.664933	0.298879	0.473871	34.172	cg02611863	NM_015478.4	GeneID:26013	20	41576510	41576488	22	TRUE	20:41576494-41576980
AHCY	0.66213	0.301838	0.477633	34.3975	cg05674199	NM_000687.1	GeneID:191	20	32355089	32354784	305	TRUE	20:32354217-32355507
PRRG4	0.659357	0.22603	0.356988	21.3554	cg19005368	NM_024081.4	GeneID:79056	11	32808526	32808065	461	TRUE	11:32807618-32808661
FLJ20232	0.658574	0.225282	0.355613	21.1859	cg03972838	NM_019008.4	GeneID:54471	22	38227526	38228230	704	TRUE	22:38227522-38227753
AOC2	0.655928	0.268223	0.42262	27.393	cg19317715	NM_001158.3	GeneID:314	17	38250104	38250135	31	FALSE
SOX1	0.655429	0.206943	0.325953	18.5816	cg22303211	NM_005986.2	GeneID:6656	13	111770172	111769914	258	TRUE	13:111768043-111771727
CYFIP1	0.654167	0.172293	0.271138	14.3021	cg15032239	NM_014608.2	GeneID:23191	15	20443395	20444125	730	TRUE	15:20443233-20445536
TTC15	0.653239	0.416233	0.654608	65.9654	cg12447832	NM_016030.5	GeneID:51112	2	3362264	3362453	189	TRUE	2:3362246-3363158
TBX4	0.645207	0.353611	0.553035	43.572	cg18536148	NM_018488.2	GeneID:9496	17	56888626	56888589	37	TRUE	17:56888442-56889722
TACSTD2	0.644143	0.335961	0.525044	39.1305	cg16080552	NM_002353.1	GeneID:4070	1	58815787	58816033	246	TRUE	1:58814224-58815985
NFYC	0.643875	0.180544	0.282104	14.611	cg13735974	NM_014223.2	GeneID:4802	1	40929567	40929953	386	TRUE	1:40929558-40930682
PSTPIP1	0.642198	0.225487	0.351919	19.8999	cg26025891	NM_003978.2	GeneID:9051	15	75074954	75074609	345	FALSE
DCHS2	0.638108	0.216085	0.33629	18.447	cg04517429	NM_199348.1	GeneID:54798	4	155633068	155632318	750	TRUE	4:155632296-155633257
WDR41	0.634528	0.319727	0.496354	34.1282	cg02017109	NM_018268.2	GeneID:55255	5	76824351	76824088	263	TRUE	5:76823331-76824380
Bles03	0.633074	0.265305	0.411452	24.5186	cg10467098	NM_031450.2	GeneID:83638	11	65444468	65443107	1361	FALSE
TMEM119	0.631965	0.275246	0.426542	25.9228	cg16708012	NM_181724.1	GeneID:338773	12	107516243	107515913	330	FALSE
SLC4A3	0.631867	0.265125	0.410829	24.3676	cg08274552	NM_201574.1	GeneID:6508	2	220200078	220200527	449	FALSE
EFCAB1	0.630014	0.21059	0.325906	17.1792	cg11868900	NM_024593.2	GeneID:79645	8	49810588	49810344	244	TRUE	8:49810084-49811166
FLJ10781	0.629168	0.478821	0.740579	88.7032	cg06851207	NM_018215.2	GeneID:55228	19	51666978	51666617	361	TRUE	19:51666325-51667046
TUBB2B	0.629078	0.20882	0.322956	16.8865	cg23517605	NM_178012.3	GeneID:347733	6	3173364	3172870	494	TRUE	6:3171849-3175236
SUOX	0.628412	0.304669	0.470977	30.4325	cg06495347	NM_000456.2	GeneID:6821	12	54677718	54677310	408	FALSE
TUBGCP6	0.623415	0.254338	0.391812	22.1079	cg11808757	NM_001008658.1	GeneID:85378	22	49026034	49025527	507	TRUE	22:49024879-49026203
ABHD9	0.623017	0.271785	0.418573	24.4557	cg05488632	NM_024794.1	GeneID:79852	19	15204174	15204231	57	TRUE	19:15203545-15205922
TMEM109	0.621753	0.347031	0.533992	37.9321	cg10735607	NM_024092.1	GeneID:79073	11	60437091	60438253	1162	TRUE	11:60436776-60437102
SLC22A18	0.621427	0.382784	0.588873	46.7262	cg22858288	NT_009237.17	GeneID:5002	11	2886898			TRUE	11:2886834-2887801
LOC132321	0.620074	0.185601	0.285261	13.8017	cg03916421	NM_173487.1	GeneID:132321	4	130232911	130234356	1445	FALSE
FAM50A	0.60801	0.264147	0.402601	21.991	cg12219915	NM_004699.1	GeneID:9130	X	153325488	153325702	214	TRUE	X:153325293-153326263
HTRA4	0.607054	0.305505	0.465328	27.8933	cg12535715	NM_153692.2	GeneID:203100	8	38950850	38950854	4	TRUE	8:38950649-38951953
PITX1	0.605843	0.454024	0.690965	67.3587	cg24495017	NM_002653.3	GeneID:5307	5	134398429	134397887	542	TRUE	5:134396353-134398530
CASP6	0.604329	0.260266	0.395675	21.1437	cg17714799	NM_032992.2	GeneID:839	4	110844529	110844078	451	FALSE
SAC	0.603123	0.32399	0.492142	30.5532	cg08205865	NM_018417.2	GeneID:55811	1	166150003	166149964	39	FALSE
PLEKHG5	0.602929	0.255736	0.388411	20.4765	cg04818845	NM_020631.2	GeneID:57449	1	6502754	6502656	98	FALSE
CENTD1	0.601855	0.221973	0.336882	16.4901	cg15127324	NM_015230.2	GeneID:116984	4	35922837	35922374	463	TRUE	4:35921845-35922935
GPR75	0.599585	0.195156	0.295716	13.5791	cg14832904	NM_006794.1	GeneID:10936	2	53940532	53940572	40	TRUE	2:53940114-53941112
SLC16A8	0.5968	0.315801	0.477604	28.3077	cg20439022	NM_013356.1	GeneID:23539	22	36808733	36809095	362	TRUE	22:36808478-36808906
LOC148137	0.595939	0.250373	0.378428	19.2225	cg15660498	NM_144692.1	GeneID:148137	19	40941773	40940925	848	TRUE	19:40940302-40941942
RP11-450P7.3	0.594944	0.212951	0.321644	15.0088	cg21655480	NM_153270.1	GeneID:257240	X	21586973	21586369	604	TRUE	X:21583682-21587167
ST6GAL1	0.594653	0.268491	0.405451	21.3067	cg15928398	NM_173216.1	GeneID:6480	3	188130644	188131210	566	TRUE	3:188130446-188132671
CMTM4	0.591594	0.334668	0.504314	30.8564	cg18693704	NM_178818.2	GeneID:146223	16	65288814	65288111	703	TRUE	16:65287287-65288884
NTN2L	0.591248	0.314275	0.473471	27.3939	cg22721827	NM_006181.1	GeneID:4917	16	2460959	2461501	542	FALSE
CUL7	0.590439	0.27776	0.418224	22.111	cg18159180	NM_014780.3	GeneID:9820	6	43130191	43129632	559	TRUE	6:43130018-43130272
SSTR3	0.586992	0.324175	0.486947	28.4368	cg14297029	NM_001051.2	GeneID:6753	22	35937622	35938299	677	TRUE	22:35937354-35937668
COX7A1	0.586623	0.269435	0.404617	20.7053	cg24335895	NM_001864.2	GeneID:1346	19	41335611	41335611	0	TRUE	19:41335049-41335665
LGP1	0.585633	0.328277	0.492645	28.9677	cg08468689	NM_032484.3	GeneID:84514	17	37600206	37599739	467	FALSE
ARTN	0.584591	0.201822	0.302656	13.332	cg06207804	NM_003976.2	GeneID:9048	1	44171585	44171579	6	TRUE	1:44171543-44171935
TCERG1L	0.581563	0.230898	0.345532	15.9629	cg10175795	NM_174937.1	GeneID:256536	10	132999184	132999976	792	TRUE	10:132999115-133001206
PCK1	0.57943	0.263062	0.393082	19.2999	cg16101800	NM_002591.2	GeneID:5105	20	55569975	55569543	432	FALSE
ARF5	0.576236	0.227276	0.338859	15.1977	cg15802323	NM_001662.2	GeneID:381	7	127015378	127015753	375	TRUE	7:127014895-127016535
FLJ11017	0.572095	0.471944	0.70163	63.8849	cg04301614	NM_018302.1	GeneID:55286	4	37262388	37262250	138	FALSE
JPH4	0.571435	0.29842	0.443452	22.8989	cg06536578	NM_032452.1	GeneID:84502	14	23118395	23117834	561	FALSE
LOC158160	0.571368	0.330792	0.491534	27.5462	cg03665457	NM_182829.1	GeneID:158160	10	38685382	38685312	70	TRUE	10:38684978-38685687
NMBR	0.568346	0.323156	0.479183	25.9783	cg08109815	NM_002511.1	GeneID:4829	6	142451524	142451629	105	TRUE	6:142450876-142451811
MID1IP1	0.567976	0.291233	0.431737	21.6365	cg25812668	NM_021242.3	GeneID:58526	X	38547870	38548017	147	TRUE	X:38547756-38550317
RP3-473B4.1	0.565784	0.219432	0.324802	13.8017	cg01309671	NM_138819.1	GeneID:159091	X	133768891	133768890	1	TRUE	X:133768631-133769176
SLC1A2	0.564427	0.309034	0.456999	23.5763	cg08258650	NM_004171.2	GeneID:6506	11	35398476	35397372	1104	TRUE	11:35396372-35398905
CCDC38	0.563078	0.319581	0.472155	24.8631	cg25229172	NM_182496.1	GeneID:120935	12	94860252	94860559	307	TRUE	12:94860191-94861674
PARVB	0.56113	0.216839	0.31993	13.2833	cg18883209	NM_013327.3	GeneID:29780	22	42725934	42726506	572	FALSE
PKMYT1	0.560564	0.335278	0.494483	26.8784	cg02510853	NM_182687.1	GeneID:9088	16	2971708	2970475	1233	TRUE	16:2969706-2971908
LOC168850	0.558223	0.276143	0.406608	18.9835	cg08137040	NM_176814.3	GeneID:168850	7	126820931	126820003	928	TRUE	7:126818736-126821420
NEFH	0.557349	0.242767	0.357247	15.3961	cg02994956	NM_021076.2	GeneID:4744	22	28206534	28206219	315	TRUE	22:28205749-28207420
TGIF2	0.556798	0.227288	0.334341	13.9355	cg12556134	NM_021809.4	GeneID:60436	20	34635024	34635437	413	TRUE	20:34634551-34637190
CEP63	0.55591	0.314494	0.462337	23.3768	cg06541857	NM_025180.2	GeneID:80254	3	135686479	135687759	1280	FALSE
CDK2	0.552839	0.284392	0.417194	19.402	cg09106999	NM_001798.2	GeneID:1017	12	54646332	54646826	494	FALSE
CENTB2	0.549727	0.361711	0.529476	29.6797	cg14163776	NM_012287.3	GeneID:23527	3	196645869	196645041	828	FALSE
C20orf135	0.549451	0.487554	0.71355	62.8007	cg09868035	NM_080622.2	GeneID:140701	20	61962518	61963010	492	FALSE
TTC10	0.545823	0.371908	0.54293	30.8392	cg18735146	NM_006531.2	GeneID:8100	13	20038606	20039208	602	TRUE	13:20038561-20039854
DDOST	0.545463	0.425467	0.620965	42.0664	cg08911391	NM_005216.3	GeneID:1650	1	20861177	20860531	646	FALSE
PRLHR	0.543529	0.233192	0.339885	13.6171	cg16196812	NM_004248.1	GeneID:2834	10	120345129	120344746	383	TRUE	10:120343551-120346241
ANGPTL2	0.542534	0.314964	0.458753	22.0109	cg09427311	NM_012098.2	GeneID:23452	9	128925551	128924865	686	FALSE
C1orf65	0.542234	0.325225	0.4736	23.2955	cg27202708	NM_152610.1	GeneID:164127	1	221633332	221633391	59	TRUE	1:221633187-221633859
NTF3	0.541148	0.342694	0.498664	25.541	cg04740359	NM_002527.3	GeneID:4908	12	5473803	5473527	276	TRUE	12:5473723-5474332
ALOX12	0.540324	0.361662	0.525965	28.3077	cg03760483	NM_000697.1	GeneID:239	17	6840021	6840128	107	TRUE	17:6839463-6841283
PAQR7	0.539308	0.401225	0.583091	35.4202	cg23799313	NM_178422.4	GeneID:164091	1	26070947	26070331	616	FALSE
PCDHGC4	0.537292	0.496266	0.720204	62.3014	cg15361590	NM_018928.2	GeneID:56098	5	140844885	140844925	40	TRUE	5:140844389-140845813
MEOX1	0.53712	0.443547	0.643619	44.8915	cg08471713	NM_013999.2	GeneID:4222	17	39094419	39094457	38	FALSE
HOXA7	0.534436	0.488096	0.706946	58.326	cg26511321	NM_006896.2	GeneID:3204	7	27163315	27162821	494	TRUE	7:27162023-27163571
PLEK2	0.533904	0.541366	0.783812	82.7134	cg17641252	NM_016445.1	GeneID:26499	14	66948288	66948581	293	TRUE	14:66948159-66949047
C16orf50	0.531848	0.239825	0.346735	13.425	cg09212468	NM_032269.3	GeneID:84229	16	56286133	56286227	94	FALSE
WNT16	0.529696	0.302628	0.436882	19.2958	cg24849648	NM_016087.2	GeneID:51384	7	120751255	120752657	1402	FALSE
TLOC1	0.527929	0.301234	0.434337	19.0083	cg04561804	NM_003262.3	GeneID:7095	3	171166670	171167274	604	FALSE
PEX10	0.526511	0.428676	0.617483	38.9627	cg20664247	NM_002617.3	GeneID:5192	1	2335335	2333870	1465	TRUE	1:2335193-2335428
B3GNT4	0.525939	0.274737	0.395585	16.1135	cg19535609	NM_030765.2	GeneID:79369	12	121253711	121254181	470	TRUE	12:121253265-121255264
CGI-69	0.525206	0.337347	0.485489	22.9462	cg03192551	NM_016016.1	GeneID:51629	17	39758678	39757710	968	TRUE	17:39756526-39760418
BEX2	0.520559	0.312872	0.448819	19.5566	cg24765005	NM_032621.2	GeneID:84707	X	102452264	102452601	337	TRUE	X:102451844-102452762
NF1	0.519955	0.308404	0.442224	19.0367	cg22289810	NM_000267.1	GeneID:4763	17	26445733	26446243	510	TRUE	17:26445579-26446668
FOXD2	0.519625	0.399437	0.572626	31.6782	cg15868302	NM_004474.2	GeneID:2306	1	47672914	47674276	1362	TRUE	1:47671572-47673093
CPNE7	0.517084	0.285104	0.408001	16.416	cg16444968	NM_014427.3	GeneID:27132	16	88169224	88169677	453	TRUE	16:88168492-88170928
SETD6	0.5146	0.278557	0.397946	15.5481	cg21335942	NM_024860.1	GeneID:79918	16	57107446	57106928	518	TRUE	16:57106362-57107773
ABHD14A	0.513364	0.481019	0.686594	49.7594	cg04474832	NM_015407.3	GeneID:25864	3	51983527	51984124	597	TRUE	3:51981943-51983747
SYNPO	0.509859	0.336141	0.478635	21.1137	cg12172720	NM_007286.3	GeneID:11346	5	149999796	150000433	637	FALSE
MVP	0.506478	0.463878	0.658975	43.1518	cg00334507	NM_017458.2	GeneID:9961	16	29732100	29731591	509	FALSE
C7orf26	0.505483	0.399085	0.56654	29.3703	cg27508071	NM_024067.2	GeneID:79034	7	6595875	6596440	565	TRUE	7:6595793-6596947
SLC22A18	0.503872	0.262745	0.372576	13.4361	cg19497444	NT_009237.17	GeneID:5002	11	2887370			TRUE	11:2886834-2887801
CACNG6	0.501564	0.27496	0.389275	14.2525	cg04080057	NM_145814.1	GeneID:59285	19	59186995	59187354	359	TRUE	19:59186361-59187120
SLITRK4	0.500349	0.270071	0.38203	13.7849	cg05801573	NM_173078.2	GeneID:139065	X	142550406	142550685	279	TRUE	X:142548903-142551607
MTNR1A	0.500028	0.283853	0.401436	14.866	cg06039392	NM_005958.3	GeneID:4543	4	187713947	187713531	416	TRUE	4:187713092-187713983
GUSB	0.49949	0.31853	0.45031	18.1672	cg18219226	NM_000181.1	GeneID:2990	7	65085057	65084631	426	FALSE
RELB	0.497862	0.525926	0.742671	60.8458	cg02727285	NM_006509.2	GeneID:5971	19	50196082	50196552	470	TRUE	19:50195726-50197301
SOCS4	0.495353	0.49799	0.701999	50.0734	cg08292050	NM_080867.2	GeneID:122809	14	54562386	54563594	1208	FALSE
PCDHGB7	0.494838	0.357381	0.503609	21.991	cg23563234	NM_018927.2	GeneID:56099	5	140777470	140777466	4	TRUE	5:140777221-140777959
RP13-360B22.2	0.494444	0.33134	0.466785	19.0153	cg11839979	NM_032227.1	GeneID:84187	X	109133028	109132999	29	TRUE	X:109131973-109133498
ZNF324	0.492921	0.509074	0.716415	52.8968	cg27401095	NM_014347.1	GeneID:25799	19	63669716	63670275	559	TRUE	19:63669648-63671237
RHEB	0.49041	0.305354	0.428975	16.0482	cg21134096	NM_005614.2	GeneID:6009	7	150848816	150847942	874	TRUE	7:150846139-150848922
TUBB4	0.489973	0.358323	0.503236	21.5444	cg15677294	NM_006087.2	GeneID:10382	19	6453938	6453330	608	FALSE
ASCC3L1	0.486557	0.339908	0.476245	19.1209	cg13140267	NM_014014.2	GeneID:23020	2	96335431	96334988	443	TRUE	2:96334488-96335474
GSTO2	0.485267	0.330811	0.463083	18.0568	cg25250998	NM_183239.1	GeneID:119391	10	106018363	106018621	258	TRUE	10:106018342-106019194
TMOD4	0.484302	0.471938	0.660198	40.1249	cg03718677	NM_013353.1	GeneID:29765	1	149414890	149415050	160	FALSE
FLJ43752	0.48205	0.459635	0.641984	36.7411	cg04329454	NM_207497.1	GeneID:401253	6	33669077	33669093	16	TRUE	6:33668263-33669321
RBM13	0.48194	0.596803	0.833508	90.4108	cg23663332	NM_032509.2	GeneID:84549	8	33461496	33462259	763	TRUE	8:33461192-33462760
PCQAP	0.480692	0.587581	0.819918	83.9973	cg26608332	NM_015889.3	GeneID:51586	22	19191476	19191886	410	TRUE	22:19191421-19192789
BCDIN3	0.480649	0.356249	0.4971	20.2676	cg12584718	NM_019606.4	GeneID:56257	7	99866338	99865465	873	TRUE	7:99863663-99866414
SH2D3A	0.480372	0.43874	0.612088	32.2043	cg01036779	NM_005490.1	GeneID:10045	19	6719251	6718480	771	TRUE	19:6718910-6719312
	0.47969	0.520128	0.72529	52.6498	cg01000094		GeneID:144106	11	18239903	18240008	105	TRUE	11:18239883-18240212
CDKN2B	0.477492	0.457888	0.637528	35.4742	cg18979223	NT_008413.17	GeneID:1030	9	21995769			TRUE	9:21995095-21996291
LDHAL6A	0.474535	0.534633	0.742857	56.0506	cg07915343	NM_144972.3	GeneID:160287	11	18434256	18434007	249	TRUE	11:18433429-18434456
PTHLH	0.473528	0.407456	0.565753	25.8982	cg01333011	NM_002820.2	GeneID:5744	12	28015932	28016183	251	FALSE
AMPD3	0.471132	0.387196	0.536731	22.8269	cg24921089	NM_000480.2	GeneID:272	11	10429416	10428800	616	TRUE	11:10428264-10429468
MTNR1B	0.470475	0.294822	0.408495	13.5791	cg15842276	NM_005959.3	GeneID:4544	11	92342296	92342437	141	TRUE	11:92342113-92343227
ARL3	0.470151	0.306709	0.42487	14.4624	cg18151487	NM_004311.2	GeneID:403	10	104465330	104464180	1150	FALSE
HCA112	0.467884	0.32073	0.443596	15.4597	cg02244695	NM_018487.2	GeneID:55365	7	150128279	150128787	508	TRUE	7:150127662-150129289
MBTPS2	0.467507	0.353467	0.488746	18.6087	cg27465531	NM_015884.1	GeneID:51360	X	21767633	21767675	42	TRUE	X:21767344-21768282
MAPK10	0.466535	0.438134	0.605408	29.6468	cg17452384	NM_002753.2	GeneID:5602	4	87593261	87593307	46	FALSE
CHRM1	0.465976	0.531631	0.734316	52.2984	cg13530039	NM_000738.2	GeneID:1128	11	62446133	62445588	545	FALSE
PRP2	0.462287	0.504653	0.695272	43.0553	cg15518950	NM_173490.4	GeneID:134285	5	72451526	72452158	632	TRUE	5:72451195-72452621
FLJ43806	0.459346	0.480481	0.660622	36.4695	cg17657618	NM_201628.1	GeneID:399563	1	15300241	15300684	443	TRUE	1:15300118-15300318
C6orf206	0.458296	0.315151	0.432991	14.222	cg01344171	NM_152732.2	GeneID:221421	6	43720625	43720788	163	TRUE	6:43720593-43721485
DMP1	0.456784	0.313096	0.429717	13.9386	cg22416721	NM_004407.1	GeneID:1758	4	88789598	88790483	885	FALSE
MAB21L2	0.456771	0.598598	0.821555	78.054	cg20334738	NM_006439.3	GeneID:10586	4	151722389	151722753	364	FALSE
PLCD1	0.456618	0.439082	0.602562	28.124	cg24868271	NM_006225.1	GeneID:5333	3	38045464	38046121	657	TRUE	3:38045298-38046731
DGAT2L6	0.456518	0.346911	0.47604	16.8136	cg17693270	NM_198512.1	GeneID:347516	X	69313921	69314061	140	FALSE
AKAP12	0.456028	0.308813	0.423617	13.5609	cg12061236	NM_005100.2	GeneID:9590	6	151602579	151603202	623	TRUE	6:151602349-151604472
MASP2	0.454329	0.319043	0.437135	14.2147	cg18023080	NM_139208.1	GeneID:10747	1	11029971	11029872	99	FALSE
AMT	0.454149	0.474933	0.650646	34.2309	cg20191453	NM_000481.2	GeneID:275	3	49434859	49435016	157	TRUE	3:49434750-49435011
SNCG	0.453821	0.331835	0.454502	15.1977	cg21012874	NM_003087.1	GeneID:6623	10	88708373	88708395	22	TRUE	10:88708277-88708496
MEST	0.453269	0.606785	0.830773	81.0875	cg08077673	NM_177524.1	GeneID:4232	7	129913604	129913282	322	TRUE	7:129912883-129914215
HAMP	0.452034	0.36539	0.499842	18.2029	cg17907567	NM_021175.2	GeneID:57817	19	40465314	40465250	64	FALSE
CDH15	0.450061	0.31775	0.434077	13.7849	cg00511475	NM_004933.2	GeneID:1013	16	87765831	87765664	167	TRUE	16:87764778-87765944
SSRP1	0.44788	0.39992	0.545504	21.46	cg01511567	NM_003146.2	GeneID:6749	11	56860207	56859927	280	TRUE	11:56859304-56860378
MRPL28	0.447022	0.446485	0.608658	27.7408	cg12437481	NM_006428.3	GeneID:10573	16	360113	360541	428	TRUE	16:359840-360855
GNRH2	0.446324	0.604475	0.823636	76.2022	cg04267184	NM_178331.1	GeneID:2797	20	2971418	2972268	850	FALSE
ACRV1	0.445723	0.431996	0.588377	25.3427	cg07153965	NM_020069.3	GeneID:56	11	125057297	125056152	1145	FALSE
CSPG4	0.444398	0.511825	0.696464	40.446	cg21460582	NM_001897.3	GeneID:1464	15	73792916	73792151	765	FALSE
WDR47	0.441707	0.360675	0.489872	16.6726	cg19695867	NM_014969.3	GeneID:22911	1	109386913	109386258	655	TRUE	1:109386911-109387202
EPHA1	0.439425	0.527772	0.715692	43.2625	cg18997129	NM_005232.3	GeneID:2041	7	142815972	142816107	135	TRUE	7:142815700-142816331
LTC4S	0.438605	0.383574	0.519856	18.6088	cg16361890	NM_145867.1	GeneID:4056	5	179153151	179153592	441	FALSE
PRSS8	0.437128	0.32708	0.442835	13.461	cg13439730	NM_002773.2	GeneID:5652	16	31054500	31054652	152	TRUE	16:31054357-31054558
C18orf34	0.436461	0.344763	0.466561	14.7546	cg18382305	NM_198995.1	GeneID:374864	18	29275063	29274683	380	TRUE	18:29274320-29275128
SCML2	0.431096	0.394012	0.53123	18.8589	cg26246138	NM_006089.1	GeneID:10389	X	18282533	18282699	166	TRUE	X:18281707-18283582
CGB2	0.429895	0.531936	0.71659	41.8173	cg11177404	NM_033378.1	GeneID:114336	19	54226891	54226942	51	TRUE	19:54226438-54227222
C10orf93	0.428769	0.391684	0.52724	18.3445	cg01757745	NM_173572.1	GeneID:255352	10	134605591	134606054	463	TRUE	10:134605528-134606974
MFSD7	0.425288	0.461534	0.619766	26.486	cg24693053	NM_032219.2	GeneID:84179	4	672834	672973	139	TRUE	4:672640-673215
LIMD1	0.423717	0.472407	0.633676	27.9369	cg04037228	NM_014240.1	GeneID:8994	3	45611390	45611355	35	FALSE
FBXO17	0.422941	0.543199	0.728244	42.9877	cg24010336	NM_024907.5	GeneID:115290	19	44159098	44158220	878	TRUE	19:44159079-44159662
BPHL	0.422283	0.467378	0.626308	26.9006	cg14115346	NM_004332.1	GeneID:670	6	3063206	3064041	835	FALSE
BSCL2	0.416908	0.44235	0.590564	22.5678	cg07237830	NM_032667.4	GeneID:26580	11	62231301	62231395	94	FALSE
NHLH1	0.41421	0.531196	0.707855	37.622	cg08247612	NM_005598.2	GeneID:4807	1	158603110	158603498	388	FALSE
AKAP10	0.411755	0.376143	0.500384	15.0648	cg11630242	NM_007202.2	GeneID:11216	17	19822224	19821721	503	TRUE	17:19821177-19822421
PAQR4	0.411291	0.5278	0.701908	36.1165	cg02626929	NM_152341.2	GeneID:124222	16	2951662	2951591	71	FALSE
MGC52282	0.410713	0.614778	0.81725	64.5752	cg10186456	NM_178453.2	GeneID:124221	16	2832913	2831850	1063	TRUE	16:2832415-2833267
PTCRA	0.410588	0.450601	0.598952	22.6994	cg11898695	NM_138296.1	GeneID:171558	6	42991482	42991705	223	FALSE
ZNF583	0.409632	0.621721	0.825862	67.4643	cg12445208	NM_152478.1	GeneID:147949	19	61608017	61607530	487	TRUE	19:61606860-61608033
PSME1	0.409204	0.413914	0.549658	18.3666	cg25268718	NM_006263.2	GeneID:5720	14	23674551	23675218	667	FALSE
PGLYRP1	0.408796	0.465288	0.617706	24.3556	cg10862535	NM_005091.1	GeneID:8993	19	51218323	51218163	160	TRUE	19:51218309-51218565
NME5	0.408543	0.432072	0.573509	20.198	cg13707560	NM_003551.2	GeneID:8382	5	137502599	137503031	432	TRUE	5:137502546-137502930
SOX15	0.408145	0.545211	0.723484	39.5507	cg01029592	NM_006942.1	GeneID:6665	17	7434177	7434212	35	FALSE
ECRG4	0.405423	0.465621	0.616705	23.8995	cg10885338	NM_032411.1	GeneID:84417	2	106049072	106048545	527	TRUE	2:106048153-106049083
MDS032	0.404334	0.420134	0.556039	18.4275	cg01252496	NM_018467.2	GeneID:55850	19	17187655	17187168	487	TRUE	19:17186672-17187660
NOL10	0.402397	0.527251	0.696868	33.8734	cg02196655	NM_024894.1	GeneID:79954	2	10748215	10747549	666	TRUE	2:10746991-10748581
ACTC	0.401329	0.647379	0.85501	77.3441	cg06048973	NM_005159.3	GeneID:70	15	32875399	32875153	246	FALSE
DPP4	0.399551	0.502566	0.662933	28.5355	cg12335708	NM_001935.3	GeneID:1803	2	162639249	162639298	49	TRUE	2:162637886-162639319
TMEM129	0.398084	0.517048	0.681344	30.8704	cg21505886	NM_138385.2	GeneID:92305	4	1694226	1692882	1344	FALSE
MEST	0.396256	0.577627	0.760208	45.0222	cg07427065	NT_007933.14	GeneID:4232	7	129917832			TRUE	7:129917351-129920395
FLJ14346	0.3948	0.413536	0.5437	16.6572	cg09204187	NM_025029.2	GeneID:80097	2	130657138	130656173	965	FALSE
ZC3H7A	0.391648	0.631066	0.82789	63.7182	cg14959707	NM_014153.2	GeneID:29066	16	11783892	11783909	17	TRUE	16:11783829-11784227
HRC	0.391518	0.532486	0.6985	32.5233	cg10910525	NM_002152.2	GeneID:3270	19	54350044	54350493	449	FALSE
GPR137	0.388673	0.605604	0.79285	51.8082	cg25400358	NM_020155.2	GeneID:56834	11	63810735	63809907	828	TRUE	11:63810728-63810935
PCDHGC4	0.387671	0.560222	0.732927	37.7989	cg12145907	NM_018928.2	GeneID:56098	5	140845018	140844925	93	TRUE	5:140844389-140845813
ALS2CR14	0.387131	0.453016	0.59245	19.7352	cg14367014	NM_178231.1	GeneID:65068	2	203443373	203444331	958	FALSE
TMOD3	0.385666	0.432496	0.56504	17.4244	cg19686152	NM_014547.3	GeneID:29766	15	49908834	49909181	347	FALSE
KCNA3	0.382588	0.397022	0.517589	13.9828	cg03483626	NM_002232.2	GeneID:3738	1	111019799	111019178	621	TRUE	1:111017242-111019922
LDHD	0.382056	0.419858	0.547158	15.8101	cg24429836	NM_153486.2	GeneID:197257	16	73708245	73708166	79	FALSE
BNC1	0.381449	0.399129	0.519925	14.0361	cg27169020	NM_001717.2	GeneID:646	15	81745233	81744472	761	TRUE	15:81742719-81745331
TCF12	0.381008	0.396528	0.51638	13.8017	cg23131007	NM_003205.3	GeneID:6938	15	54997536	54998125	589	TRUE	15:54997353-54999553
GAB1	0.380264	0.568875	0.740436	37.9437	cg01601573	NM_207123.1	GeneID:2549	4	144476285	144477500	1215	TRUE	4:144475800-144478643
MRPL54	0.380099	0.398662	0.518831	13.8702	cg00968931	NM_172251.1	GeneID:116541	19	3713178	3713672	494	FALSE
SRCRB4D	0.379854	0.66942	0.871056	78.5266	cg13594711	NM_080744.1	GeneID:136853	7	75876721	75876948	227	FALSE
EYA4	0.37697	0.616777	0.800954	51.5372	cg21296676	NM_004100.2	GeneID:2070	6	133603353	133604206	853	TRUE	6:133603260-133605886
NFATC2	0.37649	0.455387	0.591174	18.6214	cg10226546	NM_173091.2	GeneID:4773	20	49592403	49592665	262	TRUE	20:49592243-49593041
AQP3	0.375916	0.64249	0.833736	61.7746	cg26624914	NM_004925.3	GeneID:360	9	33438382	33437590	792	FALSE
OGDH	0.375713	0.464975	0.603296	19.5193	cg07408740	NM_002541.2	GeneID:4967	7	44611831	44612696	865	TRUE	7:44611775-44612173
RASGRP2	0.374495	0.417387	0.541094	14.7688	cg14170423	NM_005825.2	GeneID:10235	11	64270385	64269504	881	TRUE	11:64269841-64270555
HSPA2	0.370605	0.513111	0.663398	24.899	cg27120999	NT_026437.11	GeneID:3306	14	64077803			TRUE	14:64075878-64079365
ARL14	0.370507	0.505711	0.653787	23.8013	cg16334519	NM_025047.1	GeneID:80117	3	161878388	161877641	747	FALSE
VAMP8	0.368236	0.567477	0.732485	34.4433	cg05656364	NM_003761.2	GeneID:8673	2	85658243	85658228	15	FALSE
CKMT2	0.367716	0.528454	0.681869	26.7668	cg22979433	NM_001825.1	GeneID:1160	5	80564365	80564938	573	FALSE
LAMA3	0.362	0.420137	0.539963	13.771	cg14894144	NM_000227.2	GeneID:3909	18	19524552	19523560	992	TRUE	18:19523109-19524860
ANK3	0.361876	0.584609	0.751279	36.784	cg12354377	NM_001149.2	GeneID:288	10	61819563	61819494	69	FALSE
HPN	0.36182	0.544935	0.700266	28.3709	cg06151964	NM_182983.1	GeneID:3249	19	40223257	40223250	7	TRUE	19:40223056-40223277
ANKRD33	0.361053	0.513929	0.660071	23.3707	cg19948393	NM_182608.2	GeneID:341405	12	50568077	50568011	66	TRUE	12:50567870-50568245
PLAGL1	0.360725	0.660482	0.848106	63.135	cg17895149	NM_006718.2	GeneID:5325	6	144371522	144371246	276	TRUE	6:144370510-144371695
MMRN2	0.359548	0.600239	0.770121	40.2575	cg19368582	NM_024756.1	GeneID:79812	10	88706626	88707352	726	FALSE
MYEF2	0.357782	0.591969	0.758582	37.486	cg20603888	NM_016132.2	GeneID:50804	15	46258265	46257788	477	FALSE
C8orf38	0.357357	0.452557	0.579761	15.9343	cg21197871	NM_152416.1	GeneID:137682	8	96105979	96106398	419	TRUE	8:96105896-96106919
TH	0.355558	0.604526	0.773479	40.2272	cg05912121	NM_199292.1	GeneID:7054	11	2149610	2149611	1	FALSE
BNIP3	0.355412	0.518093	0.662822	22.9744	cg21762589	NM_004052.2	GeneID:664	10	133646466	133645425	1041	TRUE	10:133644338-133646745
UPB1	0.353867	0.471822	0.60298	17.3551	cg10613381	NM_016327.2	GeneID:51733	22	23220330	23221251	921	TRUE	22:23220142-23221542
MGC35048	0.35315	0.605569	0.773521	39.7837	cg16616769	NM_153208.1	GeneID:124152	16	19634643	19635279	636	FALSE
STMN1	0.352351	0.435687	0.556215	13.9639	cg23323671	NM_005563.3	GeneID:3925	1	26106210	26105955	255	TRUE	1:26104408-26106291
CBX7	0.343953	0.524733	0.666006	21.9536	cg23124451	NM_175709.2	GeneID:23492	22	37878077	37878484	407	TRUE	22:37877791-37879728
SLD5	0.341814	0.542372	0.687375	23.9946	cg24599942	NM_032336.1	GeneID:84296	8	41505502	41505903	401	TRUE	8:41505438-41506669
TRIP10	0.340502	0.692264	0.876543	69.3167	cg02085507	NM_004240.2	GeneID:9322	19	6690192	6690707	515	TRUE	19:6690009-6691192
SEC61A2	0.340012	0.648534	0.820893	48.8255	cg18678121	NM_018144.2	GeneID:55176	10	12210813	12211704	891	TRUE	10:12210774-12212203
SERPINB4	0.339772	0.559687	0.708316	26.3303	cg24546942	NM_002974.1	GeneID:6318	18	59461606	59462470	864	FALSE
SMPD3	0.339637	0.673845	0.852709	59.3482	cg17217677	NM_018667.2	GeneID:55512	16	67040695	67039905	790	TRUE	16:67039271-67040730
VSIG2	0.339047	0.602129	0.761645	34.6636	cg02082342	NM_014312.3	GeneID:23584	11	124127583	124127319	264	FALSE
TH	0.338103	0.679995	0.859577	61.4794	cg08573687	NM_199292.1	GeneID:7054	11	2149617	2149611	6	FALSE
MYF5	0.337904	0.684551	0.865217	63.7182	cg26207503	NM_005593.1	GeneID:4617	12	79634880	79634932	52	TRUE	12:79634686-79635423
KCNJ14	0.335678	0.465528	0.587483	14.5169	cg10222534	NM_013348.2	GeneID:3770	19	53650706	53650578	128	FALSE
MGC15875	0.335279	0.49974	0.630483	17.7049	cg18042806	NM_032921.1	GeneID:85007	5	177592577	177592397	180	TRUE	5:177591693-177592655
PDE4A	0.33512	0.553922	0.698763	24.4528	cg08859675	NM_006202.1	GeneID:5141	19	10424771	10424637	134	FALSE
VTN	0.334574	0.631349	0.796134	41.1863	cg04706338	NM_000638.2	GeneID:7448	17	23721179	23721844	665	FALSE
CGREF1	0.333052	0.588755	0.74164	30.1745	cg06112415	NM_006569.2	GeneID:10669	2	27195662	27195475	187	TRUE	2:27195000-27195770
ZNF239	0.332266	0.650362	0.818798	46.4152	cg04825431	NM_005674.1	GeneID:8187	10	43383905	43383913	8	FALSE
ELF1	0.329105	0.479096	0.601857	14.8854	cg11793332	NM_172373.2	GeneID:1997	13	40454827	40454418	409	FALSE
GATA2	0.328902	0.550271	0.691171	22.7866	cg06490988	NM_032638.3	GeneID:2624	3	129694691	129694718	27	TRUE	3:129693171-129695283
TLE6	0.327485	0.618479	0.776083	35.3982	cg08794763	NM_024760.1	GeneID:79816	19	2928843	2928562	281	FALSE
C1QL1	0.326891	0.631784	0.792451	38.7382	cg16772514	NM_006688.3	GeneID:10882	17	40402398	40401170	1228	TRUE	17:40402280-40402551
NUCB1	0.326732	0.470463	0.59004	13.9352	cg21252483	NM_006184.3	GeneID:4924	19	54091600	54091637	37	TRUE	19:54091451-54091731
FYCO1	0.32663	0.541257	0.67878	21.158	cg24919972	NM_024513.1	GeneID:79443	3	46012612	46012304	308	TRUE	3:46011871-46012674
SUSD2	0.325207	0.538607	0.674791	20.6142	cg23349242	NM_019601.3	GeneID:56241	22	22907448	22907444	4	FALSE
GTL3	0.323968	0.622597	0.779348	35.3982	cg25771195	NM_013242.2	GeneID:29105	16	56721315	56720797	518	TRUE	16:56720072-56721737
TSC1	0.323888	0.576463	0.721559	25.8248	cg19393006	NM_000368.3	GeneID:7248	9	134810588	134809841	747	FALSE
PRSS21	0.323542	0.479916	0.600566	14.3154	cg22730830	NM_144956.1	GeneID:10942	16	2807435	2807165	270	TRUE	16:2807115-2808150
EGF	0.322066	0.589242	0.736623	27.6468	cg13379236	NM_001963.2	GeneID:1950	4	111053257	111053499	242	FALSE
ADAM30	0.320184	0.672435	0.839528	49.7112	cg23131777	NM_021794.2	GeneID:11085	1	120240448	120240636	188	TRUE	1:120240390-120240877
EML1	0.319869	0.470443	0.587216	13.1886	cg02727423	NM_004434.2	GeneID:2009	14	99328726	99329498	772	TRUE	14:99328718-99330143
BSCL2	0.319577	0.58593	0.73122	26.4838	cg20342105	NM_032667.4	GeneID:26580	11	62231486	62231395	91	FALSE
DIO2	0.319016	0.548234	0.68391	20.7791	cg00217795	NM_000793.3	GeneID:1734	14	79747441	79748278	837	TRUE	14:79747335-79747567
TMEM88	0.318055	0.579897	0.722928	25.1347	cg23671708	NM_203411.1	GeneID:92162	17	7699016	7699109	93	TRUE	17:7698629-7699147
SEMA3B	0.317357	0.695978	0.86722	58.7721	cg24019851	NT_022517.17	GeneID:7869	3	50289295			TRUE	3:50287560-50290055
PTGES	0.316442	0.494573	0.615869	14.6799	cg26672426	NM_004878.3	GeneID:9536	9	131554403	131555165	762	TRUE	9:131554315-131554653
TCF15	0.314625	0.617374	0.767821	31.4498	cg06143901	NM_004609.3	GeneID:6939	20	539400	538910	490	TRUE	20:538102-539417
CDKN2B	0.311381	0.593585	0.736577	25.9783	cg19481686	NT_008413.17	GeneID:1030	9	21995288			TRUE	9:21995095-21996291
VPS37B	0.309389	0.709057	0.878651	61.1654	cg24664957	NM_024667.1	GeneID:79720	12	121946956	121946665	291	TRUE	12:121945921-121947044
ALAS1	0.309244	0.593658	0.735577	25.5312	cg03929796	NM_199166.1	GeneID:211	3	52206880	52207156	276	TRUE	3:52206843-52207774
SURF5	0.309176	0.59881	0.741926	26.4012	cg01605984	NM_181491.1	GeneID:6837	9	135205975	135204793	1182	FALSE
MIOX	0.307216	0.650033	0.804298	37.3757	cg24867501	NM_017584.5	GeneID:55586	22	49272203	49272079	124	FALSE
LRFN3	0.307052	0.546297	0.675866	18.5865	cg15060813	NM_024509.1	GeneID:79414	19	41120148	41119862	286	FALSE
TNFRSF4	0.306789	0.683073	0.844928	48.0796	cg22335801	NM_003327.2	GeneID:7293	1	1138954	1139375	421	TRUE	1:1138837-1139104
C11orf47	0.306297	0.676653	0.836702	45.4407	cg18103150	NM_173589.2	GeneID:283294	11	6475483	6475107	376	TRUE	11:6475045-6475550
SLC35E4	0.303651	0.551513	0.680712	18.6334	cg26233253	NM_001001479.1	GeneID:339665	22	29362613	29362313	300	FALSE
NAG8	0.299057	0.67017	0.824536	40.5146	cg27263448	NM_014411.2	GeneID:27099	7	127425107	127424798	309	FALSE
RHOD	0.297398	0.597299	0.734036	23.597	cg12473775	NM_014578.2	GeneID:29984	11	66581226	66580897	329	TRUE	11:66580635-66581321
CAPN12	0.297168	0.631416	0.77584	29.7798	cg15698196	NM_144691.3	GeneID:147968	19	43928194	43926954	1240	FALSE
NOXA1	0.296679	0.671667	0.825018	40.1217	cg04837071	NM_006647.1	GeneID:10811	9	139438470	139437668	802	TRUE	9:139436592-139438641
RASL12	0.296162	0.506915	0.622428	13.2939	cg03349935	NM_016563.2	GeneID:51285	15	63148388	63147441	947	FALSE
MGC40222	0.295637	0.519056	0.637104	14.2126	cg02110963	NM_152738.1	GeneID:221718	6	10542961	10542760	201	FALSE
ABI3	0.295128	0.625178	0.76709	27.9369	cg25839227	NM_016428.2	GeneID:51225	17	44643501	44642588	913	FALSE
KRT8	0.293124	0.653547	0.800785	33.71	cg20324165	NM_002273.2	GeneID:3856	12	51585412	51585127	285	FALSE
STRN4	0.292506	0.65124	0.797616	32.9817	cg14799446	NM_013403.1	GeneID:29888	19	51942447	51941527	920	FALSE
KCNQ1	0.291893	0.515488	0.631084	13.461	cg12578166	NM_181797.1	GeneID:3784	11	2423485	2422797	688	TRUE	11:2421914-2423515
C14orf48	0.288475	0.614035	0.749951	24.3314	cg24520070	NM_152777.2	GeneID:256369	14	93532090	93533395	1305	TRUE	14:93531980-93532194
C1orf35	0.28601	0.624158	0.761012	25.5102	cg14925024	NM_024319.2	GeneID:79169	1	226358328	226357645	683	TRUE	1:226356160-226358366
C16orf30	0.285919	0.61898	0.754652	24.5732	cg17706173	NM_024600.1	GeneID:79652	16	1522582	1523659	1077	FALSE
VWCE	0.285568	0.626824	0.76403	25.9044	cg11072113	NM_152718.1	GeneID:220001	11	60819700	60819122	578	TRUE	11:60818116-60819776
ZNF541	0.285264	0.558614	0.680746	16.5054	cg04391540	NM_032255.1	GeneID:84215	19	52739941	52739966	25	TRUE	19:52739817-52741134
C9orf66	0.284393	0.533755	0.650059	14.0134	cg08909157	NM_152569.1	GeneID:157983	9	205561	205741	180	TRUE	9:203685-205584
SLC5A11	0.283287	0.695522	0.846425	42.6999	cg23280807	NM_052944.2	GeneID:115584	16	24765080	24765053	27	FALSE
DIRAS3	0.282709	0.677151	0.823739	36.6442	cg02317907	NT_032977.8	GeneID:9077	1	68288376			TRUE	1:68288302-68289231
PARP12	0.281971	0.722072	0.877935	52.8488	cg07937272	NM_022750.2	GeneID:64761	7	139409708	139409990	282	TRUE	7:139408342-139409766
IL32	0.281491	0.661165	0.803613	32.0183	cg18350391	NM_001012631.1	GeneID:9235	16	3055553	3055314	239	FALSE
CLEC14A	0.28136	0.601481	0.731004	20.9688	cg14473145	NM_175060.1	GeneID:161198	14	37795407	37795325	82	TRUE	14:37793841-37795561
RLN2	0.279319	0.542963	0.658952	14.1378	cg02875297	NM_134441.1	GeneID:6019	9	5294611	5294580	31	TRUE	9:5293703-5294659
SMPD3	0.274882	0.582933	0.705288	17.4647	cg00891541	NM_018667.2	GeneID:55512	16	67038988	67039905	917	TRUE	16:67038237-67039167
ALX4	0.274366	0.539143	0.652073	13.1814	cg23058901	NT_009237.17	GeneID:60529	11	44281335			TRUE	11:44281312-44281846
CLEC14A	0.272441	0.629519	0.760364	23.2998	cg18403361	NM_175060.1	GeneID:161198	14	37795501	37795325	176	TRUE	14:37793841-37795561
MAP3K14	0.269177	0.579606	0.698495	16.1491	cg19601328	NM_003954.1	GeneID:9020	17	40724512	40724125	387	FALSE
TP53I11	0.268694	0.640681	0.771839	24.2727	cg10313633	NM_006034.2	GeneID:9537	11	44929466	44929010	456	TRUE	11:44927577-44929557
SMPD3	0.267541	0.564975	0.680091	14.4331	cg10556064	NM_018667.2	GeneID:55512	16	67038990	67039905	915	TRUE	16:67038237-67039167
CENTA2	0.266797	0.586627	0.705791	16.5312	cg22485810	NM_018404.1	GeneID:55803	17	26272851	26273059	208	TRUE	17:26272783-26274166
PKN1	0.266332	0.695397	0.836386	36.0994	cg19103609	NM_002741.3	GeneID:5585	19	14404524	14405166	642	TRUE	19:14403590-14405780
FLJ21125	0.265353	0.667049	0.801747	28.503	cg26646411	NM_024627.4	GeneID:79680	22	18221374	18222339	965	FALSE
ADRA2B	0.264516	0.62001	0.744776	20.1827	cg20634573	NM_000682.4	GeneID:151	2	96145134	96145615	481	TRUE	2:96144986-96147016
SPTBN2	0.264509	0.655659	0.787595	25.9606	cg04985144	NM_006946.1	GeneID:6712	11	66245214	66245446	232	FALSE
GTF3C5	0.260084	0.664642	0.795941	26.5442	cg09095562	NM_012087.1	GeneID:9328	9	134894911	134895934	1023	TRUE	9:134894849-134896808
KIAA0240	0.258079	0.632725	0.756667	20.6594	cg15679095	NM_015349.1	GeneID:23506	6	42897031	42896772	259	FALSE
COX6A2	0.251582	0.616055	0.733421	17.1996	cg13726463	NM_005205.2	GeneID:1339	16	31347182	31347222	40	TRUE	16:31346216-31347186
TNNT2	0.251338	0.596314	0.709799	14.9717	cg18330203	NM_000364.2	GeneID:7139	1	199613270	199613428	158	FALSE
WISP2	0.25122	0.694175	0.826216	30.4792	cg00240880	NM_003881.2	GeneID:8839	20	42776647	42777299	652	FALSE
FLJ20273	0.250426	0.613901	0.730271	16.7299	cg15967525	NM_019027.1	GeneID:54502	4	40212695	40212725	30	FALSE
NR0B2	0.248879	0.628226	0.74651	18.2071	cg06650260	NM_021969.1	GeneID:8431	1	27113065	27113047	18	FALSE
C4orf8	0.248662	0.604303	0.717976	15.3619	cg20163033	NM_003704.3	GeneID:8603	4	2596992	2596957	35	FALSE
ABCC13	0.246721	0.606757	0.719922	15.2954	cg11429658	NM_138726.2	GeneID:150000	21	14568506	14567991	515	TRUE	21:14568050-14568536
P4HA3	0.246348	0.645527	0.765724	19.9945	cg25599211	NM_182904.3	GeneID:283208	11	73700698	73700347	351	TRUE	11:73699933-73700730
SLC35B3	0.245533	0.612145	0.725716	15.6702	cg09548084	NM_015948.2	GeneID:51000	6	8381217	8380624	593	TRUE	6:8380156-8381258
BATF	0.244489	0.59105	0.700201	13.4787	cg09937039	NM_006399.2	GeneID:10538	14	75058956	75058537	419	FALSE
C14orf49	0.242255	0.674183	0.797451	23.6335	cg16522484	NM_152592.2	GeneID:161176	14	95011802	95011926	124	FALSE
LIMD2	0.242237	0.737189	0.871965	39.976	cg02988947	NM_030576.2	GeneID:80774	17	59132545	59131217	1328	TRUE	17:59130514-59132651
ETNK2	0.241869	0.658889	0.779152	20.9965	cg01566404	NM_018208.1	GeneID:55224	1	202388548	202387645	903	FALSE
PYGO1	0.241141	0.677313	0.800534	23.8995	cg23412777	NM_015617.1	GeneID:26108	15	53668998	53668342	656	TRUE	15:53668831-53669077
AP2A2	0.239046	0.600377	0.708573	13.5031	cg01321151	NM_012305.2	GeneID:161	11	915523	915841	318	TRUE	11:915181-916508
IL4I1	0.238278	0.6865	0.809784	24.8658	cg04315771	NM_152899.1	GeneID:259307	19	55125761	55124574	1187	FALSE
SLC16A3	0.238074	0.736538	0.868686	37.8638	cg14417329	NM_004207.1	GeneID:9123	17	77779562	77780236	674	TRUE	17:77779304-77780821
ERO1L	0.236034	0.672869	0.792472	21.8678	cg08554114	NM_014584.1	GeneID:30001	14	52232954	52232169	785	TRUE	14:52232942-52233321
CLTB	0.234787	0.631184	0.742735	15.8798	cg24735937	NM_001834.2	GeneID:1212	5	175776529	175776146	383	TRUE	5:175775649-175776532
OPRD1	0.233766	0.6901	0.811489	24.3047	cg09970593	NM_000911.3	GeneID:4985	1	29012109	29011241	868	TRUE	1:29010989-29012442
RAD51C	0.233418	0.670157	0.787848	20.8014	cg19208681	NM_002876.2	GeneID:5889	17	54124627	54124962	335	TRUE	17:54124258-54125393
C1orf124	0.232764	0.61025	0.717095	13.4471	cg04636557	NM_032018.4	GeneID:83932	1	229539047	229540305	1258	TRUE	1:229538611-229539080
CPA1	0.232729	0.672956	0.79076	21.0619	cg15154229	NM_001868.1	GeneID:1357	7	129807247	129807591	344	FALSE
DIO1	0.232435	0.659373	0.774642	18.9944	cg19526600	NM_000792.4	GeneID:1733	1	54132703	54132449	254	TRUE	1:54132535-54132774
INT1	0.232266	0.801155	0.941099	67.3587	cg06942110	XM_931325.1	GeneID:26173	7	1511911	1510490	1421	TRUE	7:1511890-1512098
SLC39A14	0.231058	0.696841	0.817879	24.8724	cg05254747	NM_015359.1	GeneID:23516	8	22279882	22280737	855	TRUE	8:22279618-22279947
RB1	0.230014	0.766277	0.898725	45.5947	cg00059930	NT_024524.13	GeneID:5925	13	47792383			TRUE	13:47792306-47793951
GPR77	0.228937	0.713541	0.83625	27.8352	cg10451565	NM_018485.1	GeneID:27202	19	52531971	52532211	240	FALSE
MARK2	0.226063	0.719489	0.841542	28.2932	cg06204948	NM_017490.1	GeneID:2011	11	63412666	63412651	15	FALSE
MST1R	0.22578	0.746949	0.873489	36.0994	cg08687163	NM_002447.1	GeneID:4486	3	49915857	49916074	217	TRUE	3:49915736-49916551
CHMP4A	0.225761	0.697558	0.815721	23.5425	cg07296772	NM_014169.2	GeneID:29082	14	23753368	23753025	343	FALSE
PTGER1	0.223341	0.755198	0.881644	37.8479	cg10468702	NM_000955.2	GeneID:5731	19	14446209	14447174	965	TRUE	19:14443018-14446252
FIGNL1	0.222442	0.674717	0.787196	18.9726	cg05072008	NM_022116.2	GeneID:63979	7	50486141	50485542	599	TRUE	7:50485051-50486259
RGS5	0.220957	0.676364	0.788307	18.8849	cg10604646	NM_003617.2	GeneID:8490	1	161439273	161439496	223	FALSE
SERPINB5	0.219667	0.668963	0.778984	17.5593	cg23824713	NT_025028.13	GeneID:5268	18	59308718			TRUE	18:59308015-59308744
DSCR6	0.218593	0.663374	0.771902	16.6057	cg12564962	NM_018962.1	GeneID:53820	21	37299808	37300733	925	TRUE	21:37299098-37301923
GDF5	0.218298	0.708396	0.82412	23.5195	cg07378350	NM_000557.2	GeneID:8200	20	33490738	33489441	1297	TRUE	20:33490595-33490837
OGFR	0.218126	0.677394	0.787959	18.3932	cg21387281	NM_007346.2	GeneID:11054	20	60905884	60906622	738	FALSE
EXOC6	0.217857	0.68153	0.792623	18.9255	cg19780563	NM_001013848.1	GeneID:54536	10	94584474	94584450	24	FALSE
LTV1	0.21697	0.700209	0.813846	21.6538	cg02885771	NM_032860.3	GeneID:84946	6	144205347	144206201	854	FALSE
RHOBTB1	0.216856	0.669166	0.777703	16.9612	cg13320683	NM_014836.3	GeneID:9886	10	62431825	62431204	621	FALSE
SLC7A9	0.216809	0.660892	0.768062	15.9306	cg24734575	NM_014270.3	GeneID:11136	19	38052466	38052512	46	FALSE
DPM1	0.215789	0.76993	0.89415	39.834	cg23293787	NM_003859.1	GeneID:8813	20	49009789	49008467	1322	TRUE	20:49007725-49009844
HBZ	0.214962	0.754807	0.876085	33.9829	cg21960110	NM_005332.2	GeneID:3050	16	142482	142854	372	FALSE
DUS4L	0.213628	0.704218	0.816612	21.46	cg19770955	NM_181581.1	GeneID:11062	7	106990684	106991668	984	FALSE
ARHGEF18	0.213077	0.71633	0.83034	23.5625	cg02981853	NM_015318.2	GeneID:23370	19	7351850	7351866	16	FALSE
GDF11	0.212838	0.742751	0.860823	29.5761	cg00344358	NM_005811.2	GeneID:10220	12	54421960	54423331	1371	FALSE
SCAND2	0.212496	0.682881	0.791248	17.9073	cg17866455	NM_022050.2	GeneID:54581	15	82974955	82975713	758	TRUE	15:82974893-82975916
ALPK3	0.21192	0.703655	0.814994	20.9304	cg07251857	NM_020778.1	GeneID:57538	15	83161221	83160915	306	TRUE	15:83161197-83161950
CLCN7	0.2111	0.766141	0.886862	36.1165	cg01443630	NM_001287.3	GeneID:1186	16	1465699	1465013	686	TRUE	16:1463327-1465791
NFS1	0.210366	0.669306	0.774375	15.6483	cg12552392	NM_181679.1	GeneID:9054	20	33751925	33750688	1237	FALSE
HK2	0.210264	0.784996	0.908161	43.1784	cg24107142	NM_000189.4	GeneID:3099	2	74913863	74913290	573	FALSE
HPD	0.209462	0.68859	0.796187	18.0019	cg12694870	NM_002150.2	GeneID:3242	12	120781063	120781152	89	FALSE
PFDN2	0.207439	0.729998	0.842882	24.6188	cg05650171	NM_012394.2	GeneID:5202	1	159355726	159354462	1264	FALSE
ASB10	0.207402	0.682504	0.788024	16.7003	cg13289321	NM_080871.2	GeneID:136371	7	150514936	150515411	475	TRUE	7:150514816-150515041
BUB3	0.206594	0.703764	0.812116	19.5832	cg04058169	NM_001007793.1	GeneID:9184	10	124903428	124903860	432	TRUE	10:124903424-124904818
ARF5	0.205815	0.681315	0.785786	16.2108	cg12288726	NM_001662.2	GeneID:381	7	127015093	127015753	660	TRUE	7:127014895-127016535
CDIPT	0.205783	0.744985	0.859201	27.5823	cg24235633	NM_145752.1	GeneID:10423	16	29782678	29782012	666	TRUE	16:29782371-29782821
FLJ35784	0.205454	0.686237	0.791265	16.7609	cg23174481	NM_198534.1	GeneID:374877	19	7468555	7468485	70	FALSE
OLFML2A	0.204356	0.66727	0.76881	14.263	cg20789824	NM_182487.1	GeneID:169611	9	126602682	126602974	292	FALSE
ADORA2A	0.204083	0.67514	0.77773	15.0648	cg21584430	NM_000675.3	GeneID:135	22	23159462	23159092	370	TRUE	22:23159378-23159731
FAM20B	0.203394	0.682542	0.785881	15.8414	cg01426743	NM_014864.2	GeneID:9917	1	177260866	177261697	831	TRUE	1:177260801-177261024
ISG20	0.203334	0.712732	0.820609	20.2118	cg02334775	NM_002201.4	GeneID:3669	15	86983680	86983043	637	TRUE	15:86983615-86983821
MSLN	0.202282	0.768466	0.884133	32.9263	cg06100324	NM_005823.4	GeneID:10232	16	751348	751134	214	FALSE
RB1	0.201703	0.748893	0.861268	27.0999	cg07880715	NT_024524.13	GeneID:5925	13	47793479			TRUE	13:47792306-47793951
LGICZ1	0.201495	0.677609	0.779175	14.8448	cg26545162	NM_180990.2	GeneID:353174	17	71586687	71586904	217	FALSE
PDLIM1	0.201276	0.710849	0.817273	19.3616	cg06542614	NM_020992.2	GeneID:9124	10	97041245	97040771	474	TRUE	10:97039852-97041246
OSTalpha	0.201132	0.682987	0.785162	15.4139	cg12894629	NM_152672.3	GeneID:200931	3	197427114	197427780	666	FALSE
PROC	0.200884	0.725563	0.833964	21.8159	cg26718585	NM_000312.1	GeneID:5624	2	127892924	127892487	437	FALSE
F10	0.199863	0.751772	0.863478	27.1649	cg21367957	NM_000504.2	GeneID:2159	13	112824253	112825146	893	FALSE
SMPD2	0.197355	0.734912	0.842646	22.5774	cg20811607	NM_003080.1	GeneID:6610	6	109867524	109868659	1135	TRUE	6:109867223-109867542
SPG7	0.196142	0.679341	0.778273	14.0357	cg15206445	NM_003119.2	GeneID:6687	16	88100813	88102306	1493	TRUE	16:88100339-88100886
CCR10	0.195321	0.740872	0.848283	23.137	cg09509673	NM_016602.1	GeneID:2826	17	38087223	38087371	148	FALSE
FES	0.194441	0.730107	0.835447	20.8211	cg24888049	NM_002005.2	GeneID:2242	15	89227671	89228713	1042	FALSE
ZDHHC21	0.193995	0.727786	0.832534	20.2698	cg04217218	NM_178566.2	GeneID:340481	9	14683888	14683474	414	FALSE
BCAP31	0.193765	0.72472	0.828895	19.686	cg27453644	NM_005745.6	GeneID:10134	X	152643968	152643081	887	TRUE	X:152643867-152644966
SERPINB13	0.192478	0.689038	0.787381	14.377	cg18121684	NM_012397.2	GeneID:5275	18	59405541	59405580	39	FALSE
OGFOD1	0.185579	0.726914	0.8267	17.9211	cg22244418	NM_018233.2	GeneID:55239	16	55041618	55042954	1336	FALSE
ADPRHL1	0.182983	0.796303	0.903986	33.4377	cg00463202	NM_199162.1	GeneID:113622	13	113155711	113155840	129	TRUE	13:113155311-113155833
AVP	0.178216	0.714185	0.808088	14.3751	cg25551168	NM_000490.3	GeneID:551	20	3013343	3013370	27	FALSE
SEMA3B	0.176675	0.805123	0.910011	33.484	cg08097657	NT_022517.17	GeneID:7869	3	50289000			TRUE	3:50287560-50290055
EGFL8	0.173858	0.767965	0.86632	21.8938	cg18699916	NM_030652.1	GeneID:80864	6	32241907	32241921	14	FALSE
PNMT	0.173002	0.715475	0.806628	13.4603	cg12894984	NM_002686.2	GeneID:5409	17	35077157	35078033	876	TRUE	17:35077148-35078655
URP2	0.172452	0.807076	0.909552	32.1192	cg24088438	NM_031471.4	GeneID:83706	11	63730805	63730782	23	FALSE
GP1BB	0.171057	0.802126	0.9031	29.7548	cg05726109	NM_000407.3	GeneID:2812	22	18089755	18091066	1311	TRUE	22:18089052-18090230
MGC2747	0.168799	0.762912	0.857607	19.2853	cg25903122	NM_024104.2	GeneID:79086	19	16626692	16625876	816	FALSE
CARD10	0.167702	0.755303	0.848408	17.6673	cg13797282	NM_014550.3	GeneID:29775	22	36244805	36245156	351	TRUE	22:36244679-36245921
PROZ	0.167164	0.734393	0.824612	14.4235	cg25734864	NM_003891.1	GeneID:8858	13	112860987	112860969	18	FALSE
ADRA1D	0.166828	0.859767	0.965164	56.3818	cg09614401	NM_000678.2	GeneID:146	20	4177009	4177659	650	TRUE	20:4176404-4178574
DUSP2	0.166336	0.740168	0.83062	14.9777	cg01148741	NM_004418.2	GeneID:1844	2	96175180	96174906	274	TRUE	2:96173982-96175216
APOA1	0.165337	0.782978	0.878053	22.2587	cg19324627	NM_000039.1	GeneID:335	11	116213539	116213548	9	FALSE
WDR24	0.165088	0.771549	0.865087	19.7722	cg09852871	NM_032259.1	GeneID:84219	16	679599	680401	802	TRUE	16:679249-679645
CTSW	0.164727	0.788494	0.883865	23.2955	cg03887787	NM_001335.2	GeneID:1521	11	65404108	65403860	248	FALSE
FLJ32569	0.163758	0.743805	0.833211	14.8448	cg14893161	NM_152491.3	GeneID:148811	1	204085874	204085868	6	TRUE	1:204085476-204086074
PSPN	0.163272	0.758886	0.849819	16.9827	cg10280342	NM_004158.2	GeneID:5623	19	6327576	6326860	716	FALSE
KRT8	0.161563	0.74495	0.833225	14.4797	cg01835489	NM_002273.2	GeneID:3856	12	51585577	51585127	450	FALSE
FLJ36046	0.1591	0.825326	0.921551	31.942	cg18604842	NM_152612.2	GeneID:164592	22	20317190	20317086	104	TRUE	22:20316941-20317222
MRPS18C	0.155982	0.756182	0.842523	14.6195	cg26365668	NM_016067.1	GeneID:51023	4	84594997	84596196	1199	FALSE
APXL2	0.155565	0.818069	0.911212	27.6184	cg16609957	NM_133456.1	GeneID:134549	5	132189766	132189901	135	TRUE	5:132188724-132189822
ATP10A	0.155522	0.823443	0.917171	29.3791	cg20119871	NT_026446.13	GeneID:57194	15	23523493			TRUE	15:23522920-23523591
GRB7	0.155076	0.828936	0.923003	31.1126	cg03684977	NM_005310.2	GeneID:2886	17	35147329	35147713	384	FALSE
OGDHL	0.15291	0.782309	0.869779	17.9871	cg24356544	NM_018245.1	GeneID:55753	10	50640869	50640375	494	FALSE
FLJ32569	0.152755	0.787585	0.87555	18.9469	cg14159672	NM_152491.3	GeneID:148811	1	204085802	204085868	66	TRUE	1:204085476-204086074
FANCG	0.152674	0.755869	0.840245	13.8026	cg05293216	NM_004629.1	GeneID:2189	9	35070812	35070013	799	TRUE	9:35070751-35071158
PLEKHA4	0.149208	0.767252	0.850853	14.4478	cg08077345	NM_020904.1	GeneID:57664	19	54064085	54063670	415	FALSE
CLDN18	0.147929	0.791641	0.87712	18.1392	cg17298704	NM_001002026.2	GeneID:51208	3	139200297	139200348	51	TRUE	3:139200225-139200459
C5orf14	0.145409	0.813737	0.900029	21.9984	cg22197830	NM_024715.2	GeneID:79770	5	134237683	134237326	357	TRUE	5:134237650-134238765
C9orf84	0.14428	0.812497	0.897955	21.2472	cg06643227	NM_173521.2	GeneID:158401	9	113597060	113597109	49	TRUE	9:113597023-113597512
FLJ32011	0.143371	0.772827	0.853574	13.771	cg19987219	NM_182516.1	GeneID:148930	1	46789336	46788271	1065	FALSE
SCMH1	0.14316	0.860309	0.950058	37.7638	cg03387723	NM_012236.1	GeneID:22955	1	41481051	41480375	676	TRUE	1:41479380-41481067
TMC6	0.141199	0.822387	0.906946	22.5104	cg04947157	NM_007267.5	GeneID:11322	17	73640076	73640083	7	TRUE	17:73638939-73640147
TNS3	0.140218	0.815275	0.898492	20.3432	cg24499411	NM_022748.9	GeneID:64759	7	47546772	47545724	1048	TRUE	7:47546572-47546780
MSLN	0.135686	0.792123	0.870238	14.433	cg17501569	NM_005823.4	GeneID:10232	16	751065	751134	69	TRUE	16:750966-751193
UPK1B	0.133953	0.786706	0.86325	13.2099	cg22842233	NM_006952.3	GeneID:7348	3	120374758	120375115	357	FALSE
MRPL28	0.133321	0.830758	0.911188	21.3351	cg10805676	NM_006428.3	GeneID:10573	16	361991	360541	1450	TRUE	16:361973-362371
POLR3H	0.132203	0.824035	0.903114	19.2789	cg02738086	NM_138338.2	GeneID:171568	22	40271440	40270416	1024	TRUE	22:40271432-40271864
NYD-SP18	0.13115	0.836314	0.915903	21.8814	cg10157098	NM_032599.1	GeneID:84691	7	128142203	128142679	476	FALSE
SLC16A3	0.130745	0.801018	0.877003	14.3855	cg18345635	NM_004207.1	GeneID:9123	17	77779369	77780236	867	TRUE	17:77779304-77780821
CLEC4A	0.130636	0.794521	0.869823	13.4221	cg01007201	NM_016184.2	GeneID:50856	12	8166472	8167495	1023	FALSE
EIF3S2	0.128812	0.81384	0.889847	15.9714	cg26093687	NM_003757.1	GeneID:8668	1	32459457	32460613	1156	FALSE
C21orf123	0.128008	0.859273	0.939	27.6184	cg02706881	NM_199175.1	GeneID:378832	21	45670203	45669413	790	FALSE
NMB	0.127889	0.801918	0.876251	13.7424	cg19517291	NM_021077.3	GeneID:4828	15	83002043	83002806	763	TRUE	15:83001875-83003051
ARHGEF11	0.127426	0.814011	0.88918	15.5313	cg14265075	NM_014784.2	GeneID:9826	1	155283145	155281786	1359	TRUE	1:155281626-155283454
DDX43	0.126238	0.864412	0.943457	28.5378	cg17188169	NM_018665.1	GeneID:55510	6	74161109	74161192	83	TRUE	6:74160911-74162067
SEC22L3	0.120952	0.824487	0.89659	15.2673	cg22638542	NM_032970.2	GeneID:9117	3	42599577	42598432	1145	FALSE
MTSS1	0.120733	0.831847	0.904457	16.6487	cg18939260	NM_014751.2	GeneID:9788	8	125810527	125809840	687	TRUE	8:125809049-125810637
ZBTB7B	0.120231	0.843094	0.916366	18.9695	cg01782486	NM_015872.1	GeneID:51043	1	153253136	153253548	412	FALSE
PYY2	0.117598	0.82375	0.893708	14.0649	cg25191725	NM_021093.1	GeneID:23615	17	23578348	23577967	381	TRUE	17:23578220-23579432
GTF3C3	0.114277	0.843182	0.912687	16.5847	cg19160878	NM_012086.1	GeneID:9330	2	197373269	197372670	599	TRUE	2:197372231-197373576
NEIL1	0.111584	0.838887	0.906346	14.6792	cg12978308	NM_024608.1	GeneID:79661	15	73426486	73426463	23	TRUE	15:73426133-73428129
AFAR3	0.106853	0.870891	0.937842	20.2301	cg23625458	NM_201252.1	GeneID:246181	1	19472728	19473022	294	TRUE	1:19472685-19473594
LOC92345	0.105167	0.851472	0.91586	14.7676	cg18023724	NM_138386.1	GeneID:92345	4	164307943	164307523	420	TRUE	4:164306691-164308033
NNAT	0.0990608	0.86606	0.927616	15.4139	cg12862537	NT_011362.9	GeneID:4826	20	35582093			TRUE	20:35581886-35583655
DNAJC5B	0.0907285	0.881426	0.938637	15.3263	cg02067021	NM_033105.3	GeneID:85479	8	67096581	67096349	232	FALSE
CSNK1G2	0.0896049	0.879339	0.935686	14.3612	cg24355006	NM_001319.5	GeneID:1455	19	1920744	1920719	25	TRUE	19:1920418-1921208
PKDREJ	0.0888835	0.892349	0.949055	17.3152	cg08315277	NM_006071.1	GeneID:10343	22	45038062	45037883	179	TRUE	22:45036485-45038116
GAMT	0.0874126	0.884436	0.93968	14.5416	cg05989054	NM_000156.4	GeneID:2593	19	1353626	1352552	1074	TRUE	19:1353612-1353877
GP1BA	-0.0878786	0.934823	0.87958	-13.7256	cg11340260	NM_000173.3	GeneID:2811	17	4776256	4776372	116	FALSE
GATA5	-0.0967453	0.934989	0.874346	-16.3843	cg20822628	NT_011362.9	GeneID:140628	20	60474987			TRUE	20:60474622-60475245
CST7	-0.0987752	0.919235	0.858406	-13.7757	cg09971811	NM_003650.2	GeneID:8530	20	24878099	24877866	233	FALSE
DBH	-0.101353	0.93459	0.871186	-17.6874	cg07824742	NM_000787.2	GeneID:1621	9	135491605	135491306	299	TRUE	9:135491544-135491749
CXorf55	-0.103727	0.959078	0.892543	-25.9889	cg07621042	NM_152425.1	GeneID:139804	X	114331024	114331223	199	TRUE	X:114330002-114333488
P2RX4	-0.1063	0.918474	0.853232	-15.5687	cg17917518	NM_002560.2	GeneID:5025	12	120131566	120132047	481	TRUE	12:120131509-120132994
CHIT1	-0.106805	0.934167	0.867507	-19.2544	cg17725472	NM_003465.1	GeneID:1118	1	201465380	201465399	19	FALSE
ATAD3C	-0.106927	0.922188	0.85631	-16.5379	cg27383362	XM_933664.1	GeneID:219293	1	1375234	1374938	296	TRUE	1:1375151-1375634
F2	-0.109182	0.915917	0.849159	-15.846	cg00371195	NM_000506.2	GeneID:2147	11	46697057	46697331	274	FALSE
CD6	-0.110937	0.944397	0.874499	-23.5148	cg09902130	NM_006725.2	GeneID:923	11	60495754	60495750	4	FALSE
CDYL	-0.113393	0.897779	0.829917	-13.7707	cg14831798	NM_004824.2	GeneID:9425	6	4651426	4651392	34	FALSE
BTBD2	-0.114026	0.93794	0.866662	-22.5854	cg26927807	NM_017797.3	GeneID:55643	19	1967532	1966702	830	TRUE	19:1967362-1967575
LAMC2	-0.120469	0.882714	0.811999	-13.104	cg00208830	NM_005562.1	GeneID:3918	1	181421401	181422022	621	FALSE
GPR31	-0.120912	0.888312	0.816897	-13.9782	cg22182975	NM_005299.1	GeneID:2853	6	167491162	167491309	147	FALSE
ZNF385	-0.122067	0.919388	0.844798	-20.143	cg12962778	NM_015481.1	GeneID:25946	12	53064579	53064748	169	FALSE
GUCY1B2	-0.123983	0.897589	0.823673	-16.1852	cg24821554	NM_004129.2	GeneID:2974	13	50537954	50538143	189	FALSE
LTK	-0.1244	0.925392	0.848942	-22.3577	cg07930578	NM_206961.1	GeneID:4058	15	39593880	39593369	511	FALSE
HDAC7A	-0.127247	0.92087	0.843127	-21.9933	cg15820955	NM_015401.1	GeneID:51564	12	46479206	46479190	16	FALSE
TSPAN3	-0.127889	0.896523	0.820471	-16.9116	cg21377793	NM_005724.4	GeneID:10099	15	75151574	75150568	1006	TRUE	15:75151406-75151606
CIZ1	-0.130161	0.87322	0.797887	-13.7791	cg05826823	NM_012127.2	GeneID:25792	9	130007893	130006483	1410	FALSE
SSX5	-0.13092	0.876517	0.800478	-14.3594	cg18616655	NM_021015.3	GeneID:6758	X	47941190	47941143	47	TRUE	X:47941128-47941340
PISD	-0.133836	0.898427	0.81883	-18.7712	cg15823100	NM_014338.3	GeneID:23761	22	30357580	30356810	770	FALSE
ASZ1	-0.134532	0.866865	0.789684	-13.7888	cg16540704	NM_130768.1	GeneID:136991	7	116854652	116854779	127	TRUE	7:116854400-116855316
C10orf39	-0.134779	0.861412	0.784582	-13.1401	cg05942970	NM_194303.1	GeneID:282973	10	133805517	133805422	95	TRUE	10:133805370-133805647
MGC52423	-0.136278	0.86582	0.787778	-13.9782	cg09988116	NM_182517.1	GeneID:149466	1	43523280	43523826	546	FALSE
ZFYVE19	-0.137986	0.895808	0.814098	-19.2544	cg08659539	NM_032850.3	GeneID:84936	15	38885480	38886724	1244	FALSE
C9orf116	-0.138678	0.897571	0.81531	-19.7722	cg26224139	NM_144654.1	GeneID:138162	9	137533581	137533401	180	TRUE	9:137533389-137533681
KCNH6	-0.140634	0.929591	0.843251	-28.6319	cg06849227	NM_030779.2	GeneID:81033	17	58953426	58954427	1001	TRUE	17:58953345-58953593
MPZL1	-0.140958	0.856427	0.776708	-13.6763	cg18596794	NM_003953.4	GeneID:9019	1	165956515	165957832	1317	TRUE	1:165955684-165956570
MOCS1	-0.141346	0.859372	0.779169	-14.1069	cg03422350	NM_138928.1	GeneID:4337	6	40003649	40003433	216	FALSE
LOC349236	-0.145056	0.885735	0.801009	-19.0299	cg01120307	NM_182635.1	GeneID:349236	9	91168969	91169386	417	FALSE
C11orf42	-0.147361	0.848608	0.766209	-13.8619	cg13162577	NM_173525.1	GeneID:160298	11	6183013	6183374	361	FALSE
AFF3	-0.148276	0.919381	0.829583	-27.8306	cg07349094	NM_002285.2	GeneID:3899	2	100125446	100125469	23	TRUE	2:100125280-100125484
LYPD4	-0.149719	0.964159	0.869118	-48.1526	cg15142488	NM_173506.3	GeneID:147719	19	47040787	47040348	439	TRUE	19:47039969-47041322
TSSK2	-0.149997	0.887482	0.799846	-20.526	cg14727512	NM_053006.3	GeneID:23617	22	17498918	17498790	128	TRUE	22:17498763-17499877
TMEM43	-0.154938	0.873663	0.784699	-19.0733	cg14375111	NM_024334.1	GeneID:79188	3	14140187	14141546	1359	FALSE
FTMT	-0.155764	0.845537	0.759003	-14.9648	cg11234457	NM_177478.1	GeneID:94033	5	121215446	121215549	103	TRUE	5:121215121-121216200
LOC161931	-0.156796	0.844378	0.75742	-15.004	cg07595943	NM_139174.2	GeneID:161931	16	82782402	82782245	157	TRUE	16:82781939-82782678
DGKA	-0.157723	0.854415	0.76593	-16.5889	cg13634319	NM_001345.4	GeneID:1606	12	54609994	54611213	1219	FALSE
PCDH12	-0.158515	0.830652	0.74422	-13.7169	cg12845808	NM_016580.2	GeneID:51294	5	141318788	141318811	23	FALSE
DAND5	-0.159623	0.829817	0.742901	-13.7993	cg16854606	NM_152654.2	GeneID:199699	19	12941743	12941432	311	FALSE
EDG7	-0.161468	0.863479	0.77205	-18.7681	cg24574111	NM_012152.1	GeneID:23566	1	85103672	85104430	758	TRUE	1:85103596-85103832
MAGEA10	-0.163319	0.889049	0.793893	-24.0528	cg19964192	NM_021048.3	GeneID:4109	X	151057709	151057681	28	TRUE	X:151057621-151057831
TM7SF2	-0.164195	0.856606	0.764458	-18.2196	cg20277416	NM_003273.1	GeneID:7108	11	64635637	64635950	313	TRUE	11:64635369-64637106
GPR115	-0.164292	0.871988	0.778132	-20.838	cg23613030	NM_153838.1	GeneID:221393	6	47761615	47761559	56	FALSE
PHF20	-0.164733	0.917057	0.818101	-32.2067	cg08013810	NM_016436.3	GeneID:51230	20	33852653	33852827	174	FALSE
TMEM86B	-0.165006	0.876238	0.781538	-21.8121	cg01076838	NM_173804.3	GeneID:255043	19	60432494	60432444	50	TRUE	19:60432437-60432654
TULP2	-0.168656	0.811294	0.721785	-13.2639	cg18971671	NM_003323.1	GeneID:7288	19	54093533	54093750	217	FALSE
SLC4A5	-0.168821	0.814898	0.724908	-13.6709	cg00945862	NM_021196.2	GeneID:57835	2	74423748	74423170	578	FALSE
FAM9A	-0.170212	0.84384	0.749931	-17.478	cg00600110	NM_174951.2	GeneID:171482	X	8729528	8729424	104	TRUE	X:8729086-8729604
PTPRS	-0.170701	0.836244	0.742928	-16.5233	cg27299588	NM_002850.2	GeneID:5802	19	5237082	5237399	317	FALSE
NSDHL	-0.172669	0.816138	0.724078	-14.3749	cg10349665	NM_015922.1	GeneID:50814	X	151748843	151750167	1324	FALSE
OXER1	-0.17325	0.81402	0.721907	-14.2495	cg19863773	NM_148962.3	GeneID:165140	2	42845409	42844905	504	FALSE
PHYHD1	-0.174073	0.815119	0.72247	-14.4797	cg12754854	NM_174933.2	GeneID:254295	9	130722680	130723508	828	FALSE
TMEM40	-0.174726	0.825552	0.731386	-15.8268	cg03534410	NM_018306.2	GeneID:55287	3	12776112	12775808	304	FALSE
FOXI1	-0.174902	0.803199	0.711496	-13.406	cg00661485	NM_012188.3	GeneID:2299	5	169465950	169465495	455	TRUE	5:169465816-169466196
MAGEB2	-0.175775	0.821906	0.727627	-15.5469	cg17299712	NM_002364.3	GeneID:4113	X	30143683	30143601	82	TRUE	X:30143315-30143806
MRGPRX2	-0.176299	0.830907	0.735329	-16.7896	cg13062935	NM_054030.2	GeneID:117194	11	19039090	19038804	286	FALSE
L2HGDH	-0.176328	0.805518	0.712845	-13.8381	cg20189937	NM_024884.1	GeneID:79944	14	49849874	49848697	1177	FALSE
MAGEA12	-0.176398	0.802403	0.710054	-13.5444	cg02504280	NM_005367.4	GeneID:4111	X	151655163	151653828	1335	FALSE
GPR55	-0.184326	0.835632	0.735406	-18.9563	cg13531460	NM_005683.2	GeneID:9290	2	231499057	231498185	872	FALSE
TSPAN4	-0.184534	0.8154	0.717497	-16.2575	cg03116740	NM_003271.4	GeneID:7106	11	831335	832824	1489	FALSE
GDEP	-0.185197	0.849924	0.747532	-21.3439	cg02255004	XR_000540.1	GeneID:118425	4	80967684	80967563	121	FALSE
DEFA5	-0.18544	0.815858	0.717449	-16.488	cg15481539	NM_021010.1	GeneID:1670	8	6900851	6901669	818	FALSE
PTPN3	-0.185664	0.837308	0.736198	-19.4222	cg26646980	NM_002829.2	GeneID:5774	9	111265489	111265557	68	FALSE
CYB561D2	-0.18611	0.878796	0.772438	-27.3688	cg18797282	NM_007022.3	GeneID:11068	3	50362150	50363301	1151	FALSE
CD79B	-0.186996	0.822524	0.722532	-17.5928	cg07973967	NM_000626.1	GeneID:974	17	59363339	59363446	107	TRUE	17:59363260-59363460
NCL	-0.187721	0.871093	0.764812	-25.9704	cg26862286	NM_005381.2	GeneID:4691	2	232038551	232037449	1102	TRUE	2:232036571-232039010
GATA5	-0.188384	0.847344	0.743619	-21.5629	cg04132607	NT_011362.9	GeneID:140628	20	60474851			TRUE	20:60474622-60475245
C20orf85	-0.190848	0.803451	0.703895	-15.8575	cg15310873	NM_178456.2	GeneID:128602	20	56159499	56159389	110	TRUE	20:56159084-56159699
CBFA2T3	-0.191047	0.827967	0.725274	-19.0634	cg23606023	NM_005187.4	GeneID:863	16	87570449	87570902	453	FALSE
TAS1R2	-0.192736	0.773194	0.676502	-13.119	cg21731286	NM_152232.1	GeneID:80834	1	19059392	19058742	650	FALSE
C10orf27	-0.193946	0.785792	0.686948	-14.4272	cg01560871	NM_152710.1	GeneID:219793	10	72215430	72215163	267	FALSE
PDHA2	-0.194591	0.872702	0.762585	-27.9788	cg27108154	NM_005390.3	GeneID:5161	4	96980400	96980266	134	TRUE	4:96980084-96980953
DNAJA4	-0.195303	0.773903	0.675919	-13.525	cg07061145	NM_018602.2	GeneID:55466	15	76343233	76343551	318	FALSE
ZNF558	-0.195678	0.89088	0.777883	-33.0444	cg15751406	NM_144693.1	GeneID:148156	19	8795543	8794565	978	TRUE	19:8795536-8795751
UBE2V2	-0.195879	0.778143	0.679351	-13.9828	cg25612480	NM_003350.2	GeneID:7336	8	49083013	49083548	535	TRUE	8:49082930-49084059
TDO2	-0.196303	0.771276	0.673157	-13.427	cg08121954	NM_005651.1	GeneID:6999	4	157044653	157044297	356	FALSE
DHX37	-0.196342	0.816846	0.712912	-18.4853	cg00910168	NM_032656.2	GeneID:57647	12	124039974	124039620	354	TRUE	12:124039310-124040298
C10orf30	-0.196964	0.822427	0.717472	-19.323	cg14784653	NM_152751.1	GeneID:222389	10	13585014	13584982	32	FALSE
F2	-0.199506	0.808412	0.704005	-17.9178	cg20199333	NM_000506.2	GeneID:2147	11	46697366	46697331	35	FALSE
NUP37	-0.200591	0.778208	0.677192	-14.6195	cg08085165	NM_024057.2	GeneID:79023	12	101035541	101036491	950	FALSE
SLC39A4	-0.201404	0.789758	0.686856	-15.968	cg11800672	NM_130849.1	GeneID:55630	8	145613099	145613081	18	FALSE
LOC124220	-0.201822	0.835633	0.726542	-22.2837	cg26259865	NM_145252.1	GeneID:124220	16	2820360	2820234	126	FALSE
PCNXL2	-0.202843	0.839618	0.729491	-23.1348	cg02385474	NM_024938.2	GeneID:80003	1	231461420	231461715	295	FALSE
PIK3R5	-0.203034	0.800045	0.695016	-17.4368	cg09528351	NM_014308.1	GeneID:23533	17	8756991	8756559	432	FALSE
MALL	-0.203466	0.842409	0.7316	-23.7428	cg09113530	NM_005434.3	GeneID:7851	2	110231030	110230937	93	FALSE
BZRAP1	-0.204027	0.793855	0.689164	-16.8259	cg22182666	NM_004758.1	GeneID:9256	17	53760154	53760477	323	FALSE
TSKS	-0.204297	0.770521	0.668782	-14.404	cg05500074	NM_021733.1	GeneID:60385	19	54958148	54958327	179	FALSE
SLC22A16	-0.206742	0.873074	0.756512	-31.0673	cg18521925	NM_033125.2	GeneID:85413	6	110905016	110904537	479	TRUE	6:110903841-110905894
CUGBP2	-0.207463	0.760271	0.658439	-13.9115	cg15777781	NM_006561.2	GeneID:10659	10	11087277	11087290	13	FALSE
DEFB123	-0.208644	0.784111	0.678531	-16.4807	cg26063872	NM_153324.2	GeneID:245936	20	29491867	29492072	205	FALSE
PLCE1	-0.209708	0.769139	0.665084	-15.0088	cg23439277	NM_016341.2	GeneID:51196	10	95780864	95780559	305	FALSE
ZIM2	-0.20982	0.784454	0.678274	-16.6726	cg00354258	NT_011109.15	GeneID:23619	19	61998550			TRUE	19:61998334-61999073
VNN1	-0.210228	0.785053	0.6786	-16.7891	cg02184413	NM_004666.1	GeneID:8876	6	133076928	133076881	47	FALSE
CCIN	-0.210584	0.749023	0.647296	-13.3542	cg20870362	NM_005893.1	GeneID:881	9	36159175	36159391	216	FALSE
FAM71B	-0.211522	0.842712	0.727787	-25.4599	cg14376424	NM_130899.1	GeneID:153745	5	156525358	156525856	498	TRUE	5:156525249-156525506
IL27	-0.212812	0.807176	0.696475	-19.9644	cg17122311	NM_145659.3	GeneID:246778	16	28424779	28425656	877	FALSE
MYL5	-0.213358	0.794088	0.684923	-18.3881	cg23595927	NM_002477.1	GeneID:4636	4	661851	661711	140	TRUE	4:661751-662107
ANXA13	-0.214823	0.761718	0.656336	-14.9967	cg00283535	NM_004306.2	GeneID:312	8	124818745	124818828	83	FALSE
GRB10	-0.214991	0.814842	0.702029	-21.4374	cg03104936	NT_033968.5	GeneID:2887	7	50816662			TRUE	7:50816652-50818533
JOSD3	-0.215709	0.741792	0.638774	-13.3966	cg21296602	NM_024116.1	GeneID:79101	11	93115708	93114308	1400	FALSE
DCUN1D1	-0.216173	0.742308	0.639013	-13.4883	cg06785429	NM_020640.2	GeneID:54165	3	184182108	184181020	1088	FALSE
NRXN1	-0.2163	0.765823	0.659197	-15.616	cg16279786	NM_004801.2	GeneID:9378	2	51108810	51109107	297	TRUE	2:51107966-51109135
C21orf70	-0.216585	0.829499	0.713868	-24.0687	cg21968796	NM_058190.2	GeneID:85395	21	45182960	45184383	1423	FALSE
LAT	-0.217068	0.738689	0.635503	-13.2994	cg23797100	NM_014387.3	GeneID:27040	16	28903554	28903648	94	FALSE
REEP6	-0.219814	0.802617	0.689188	-20.557	cg22759185	NM_138393.1	GeneID:92840	19	1443038	1442165	873	TRUE	19:1441050-1443157
GNLY	-0.220234	0.776116	0.666238	-17.3152	cg11752275	NM_006433.2	GeneID:10578	2	85774547	85774925	378	FALSE
ELA2A	-0.220739	0.770557	0.661235	-16.758	cg15952725	NM_033440.1	GeneID:63036	1	15655777	15655811	34	FALSE
CYTL1	-0.221861	0.79393	0.680762	-19.7114	cg00512031	NM_018659.2	GeneID:54360	4	5072877	5072098	779	FALSE
SLC6A11	-0.222835	0.767907	0.658004	-16.7782	cg09395732	NM_014229.1	GeneID:6538	3	10832456	10832917	461	TRUE	3:10832452-10833630
GADL1	-0.222843	0.814876	0.698247	-22.8742	cg15946807	NM_207359.1	GeneID:339896	3	30868233	30867341	892	FALSE
SLC1A6	-0.224857	0.832398	0.712266	-26.2545	cg06192619	NM_005071.1	GeneID:6511	19	14944616	14944730	114	TRUE	19:14944390-14944752
SLC2A7	-0.224967	0.732911	0.627089	-13.7888	cg16084788	NM_207420.1	GeneID:155184	1	9008733	9008991	258	FALSE
DAZL	-0.225599	0.873346	0.74692	-36.0313	cg06429195	NM_001351.2	GeneID:1618	3	16621586	16622010	424	TRUE	3:16620846-16622270
BTC	-0.225658	0.751065	0.642314	-15.4472	cg19302283	NM_001729.1	GeneID:685	4	75939422	75938853	569	FALSE
	-0.225921	0.795712	0.680373	-20.6265	cg16878021		GeneID:3500	14	105280508	105280452	56	FALSE
KRTAP20-1	-0.226296	0.724543	0.619359	-13.2726	cg26565975	NM_181615.1	GeneID:337975	21	30910487	30910645	158	FALSE
FAM3D	-0.226985	0.831704	0.710624	-26.5521	cg02194211	NM_138805.2	GeneID:131177	3	58627386	58627601	215	FALSE
C1orf127	-0.227593	0.878489	0.750281	-38.0298	cg00912942	NM_173507.1	GeneID:148345	1	10947071	10946845	226	FALSE
STON2	-0.227867	0.807658	0.689657	-22.6639	cg10334928	NM_033104.2	GeneID:85439	14	80934760	80934680	80	FALSE
FKBP9	-0.230321	0.740633	0.631349	-15.071	cg17786776	NM_007270.2	GeneID:11328	7	32962670	32963577	907	TRUE	7:32962641-32964267
ERV3	-0.23103	0.783911	0.667913	-19.8935	cg27542948	NM_001007253.1	GeneID:2086	7	64091119	64090719	400	FALSE
QPRT	-0.231092	0.803443	0.684526	-22.5903	cg25023941	NM_014298.3	GeneID:23475	16	29597536	29597942	406	FALSE
TNS3	-0.235051	0.738363	0.627354	-15.4815	cg06871974	NM_022748.9	GeneID:64759	7	47545485	47545724	239	TRUE	7:47545432-47545633
LASS3	-0.236498	0.717588	0.609091	-13.9062	cg25004981	NM_178842.2	GeneID:204219	15	98902551	98902448	103	TRUE	15:98901825-98902776
PAGE4	-0.236953	0.713567	0.605487	-13.663	cg04636194	NM_007003.2	GeneID:9506	X	49480892	49480644	248	FALSE
MFAP3	-0.237008	0.743219	0.630624	-16.2326	cg03707950	NM_005927.3	GeneID:4238	5	153397269	153398752	1483	FALSE
CCND1	-0.238372	0.807993	0.684937	-24.5682	cg04717045	NT_078088.3	GeneID:595	11	69177970			TRUE	11:69177944-69178494
ANKRD7	-0.238411	0.728443	0.617486	-15.0088	cg11075556	NM_019644.1	GeneID:56311	7	117652348	117652195	153	TRUE	7:117652310-117652692
SLC43A3	-0.238853	0.791959	0.671121	-22.2755	cg19881895	NM_017611.2	GeneID:29015	11	56952116	56951629	487	FALSE
NTSR2	-0.239105	0.767386	0.650184	-19.1245	cg02092466	NM_012344.2	GeneID:23620	2	11728082	11727876	206	FALSE
DNAHL1	-0.239384	0.788613	0.668039	-21.8814	cg23753610	NM_173628.1	GeneID:284176	17	74079425	74078999	426	FALSE
HCFC1	-0.239964	0.77097	0.652832	-19.6762	cg14784348	NM_005334.1	GeneID:3054	X	152883127	152883371	244	FALSE
FLJ38379	-0.242285	0.818601	0.692049	-27.177	cg16173109	XR_001026.1	GeneID:285097	2	242594120	242594150	30	TRUE	2:242594067-242595375
TTLL10	-0.243809	0.851606	0.719193	-34.6235	cg19584957	NM_153254.1	GeneID:254173	1	1104442	1104940	498	TRUE	1:1104363-1104588
SAGE1	-0.245601	0.822273	0.693558	-28.4955	cg24101388	NM_018666.1	GeneID:55511	X	134803309	134803451	142	TRUE	X:134803096-134803517
CLDN10	-0.245632	0.748193	0.631061	-17.9417	cg08418978	NM_006984.3	GeneID:9071	13	94883970	94883859	111	TRUE	13:94883884-94884336
LOC253012	-0.245708	0.777832	0.656025	-21.4255	cg04992673	NM_198151.1	GeneID:253012	7	92686650	92686806	156	FALSE
DIO1	-0.247017	0.762937	0.642879	-19.7715	cg03886898	NM_000792.4	GeneID:1733	1	54131720	54132449	729	FALSE
OPTC	-0.24768	0.751077	0.632594	-18.5443	cg05657520	NM_014359.3	GeneID:26254	1	201729144	201729894	750	FALSE
CD79B	-0.247949	0.799697	0.673419	-24.9624	cg25729716	NM_000626.1	GeneID:974	17	59364339	59363446	893	FALSE
PAQR4	-0.249547	0.8294	0.697659	-30.7801	cg13644052	NM_152341.2	GeneID:124222	16	2950411	2951591	1180	TRUE	16:2950064-2950462
PIK3C2B	-0.250484	0.719212	0.60458	-15.699	cg12467090	NM_002646.2	GeneID:5287	1	202725762	202726097	335	FALSE
IL1F5	-0.250585	0.792455	0.666102	-24.2975	cg21378206	NM_012275.2	GeneID:26525	2	113533514	113532686	828	FALSE
CPA3	-0.251444	0.6861	0.576362	-13.1989	cg13424229	NM_001870.1	GeneID:1359	3	150064527	150065774	1247	FALSE
SERPINB5	-0.251758	0.806919	0.677709	-26.895	cg07331725	NT_025028.13	GeneID:5268	18	59308458			TRUE	18:59308015-59308744
MRC1	-0.251933	0.712979	0.598739	-15.3258	cg08704606	NM_002438.1	GeneID:4360	10	18139116	18138358	758	FALSE
KLF17	-0.25239	0.712597	0.598228	-15.3494	cg08679985	NM_173484.2	GeneID:128209	1	44356937	44357109	172	TRUE	1:44356865-44357284
CRYGB	-0.254461	0.729693	0.611702	-17.2085	cg13384498	NM_005210.2	GeneID:1419	2	208718874	208719125	251	FALSE
ACF	-0.254487	0.707724	0.593275	-15.1725	cg03817621	NM_014576.2	GeneID:29974	10	52315405	52315441	36	FALSE
CHRNA1	-0.254578	0.800627	0.671112	-26.3303	cg22925639	NM_000079.1	GeneID:1134	2	175336985	175337416	431	FALSE
SMAF1	-0.254655	0.756595	0.634168	-20.1408	cg14271690	NM_001018082.1	GeneID:149685	20	36643413	36643252	161	FALSE
KRT2A	-0.254917	0.690434	0.578608	-13.874	cg16405957	NM_000423.2	GeneID:3849	12	51332060	51332226	166	FALSE
CCDC17	-0.255021	0.802632	0.672586	-26.7607	cg09893068	NM_152500.1	GeneID:149483	1	45862180	45862316	136	FALSE
C20orf114	-0.255054	0.700013	0.58658	-14.6046	cg04405541	NM_033197.2	GeneID:92747	20	31334066	31334602	536	FALSE
FLJ31222	-0.255316	0.721075	0.60412	-16.5169	cg21639401	NM_207388.1	GeneID:388387	17	38304194	38304247	53	FALSE
TTLL11	-0.255994	0.716296	0.599833	-16.1412	cg27218220	NM_194252.1	GeneID:158135	9	123896217	123895384	833	TRUE	9:123896020-123896348
FLJ20160	-0.257242	0.690275	0.577543	-14.1242	cg15998761	NM_017694.2	GeneID:54842	2	191009029	191008944	85	FALSE
YY2	-0.257291	0.733441	0.613639	-17.982	cg01662650	NM_206923.1	GeneID:404281	X	21784244	21784524	280	TRUE	X:21783686-21784939
LAIR2	-0.257511	0.895182	0.748846	-52.5395	cg00269932	NM_002288.3	GeneID:3904	19	59705108	59705825	717	FALSE
PTPN3	-0.258416	0.732769	0.612599	-18.0568	cg17824393	NM_002829.2	GeneID:5774	9	111265640	111265557	83	FALSE
RASIP1	-0.259235	0.728365	0.608571	-17.7165	cg23082877	NM_017805.2	GeneID:54922	19	53935239	53935782	543	FALSE
CPM	-0.261733	0.784172	0.654066	-24.9437	cg20932053	NM_001874.3	GeneID:1368	12	67644360	67643287	1073	FALSE
NPC1L1	-0.262376	0.726391	0.605602	-17.9431	cg14477619	NM_013389.1	GeneID:29881	7	44547406	44547439	33	FALSE
MGC29671	-0.263378	0.687595	0.572859	-14.5583	cg01138020	NM_182538.3	GeneID:201305	17	4283843	4283968	125	FALSE
SLC11A1	-0.264055	0.814809	0.678528	-30.7725	cg18854666	NM_000578.2	GeneID:6556	2	218955299	218955161	138	FALSE
PPP3R2	-0.2646	0.680543	0.566504	-14.1844	cg02602411	NM_147180.2	GeneID:5535	9	103396998	103397104	106	TRUE	9:103396568-103397298
C1orf24	-0.265508	0.684963	0.569825	-14.59	cg25182523	NM_022083.1	GeneID:116496	1	183210911	183210305	606	FALSE
TFF1	-0.266206	0.680769	0.566062	-14.3556	cg02643667	NM_003225.2	GeneID:7031	21	42659768	42659713	55	FALSE
MLC1	-0.266482	0.674198	0.56049	-13.9115	cg05861567	NM_015166.2	GeneID:23209	22	48865813	48866041	228	TRUE	22:48865755-48865963
MGMT	-0.266836	0.729683	0.606469	-18.8817	cg12040555	NT_008818.15	GeneID:4255	10	131211820			TRUE	10:131211399-131211975
CLDN8	-0.267501	0.6783	0.563503	-14.3077	cg04052038	NM_199328.1	GeneID:9073	21	30509994	30510189	195	FALSE
MORC1	-0.267926	0.87672	0.728127	-48.4282	cg19857541	NM_014429.2	GeneID:27136	3	110319490	110319658	168	TRUE	3:110319373-110319935
SKIV2L	-0.267945	0.738395	0.613238	-19.9276	cg09583599	NM_006929.4	GeneID:6499	6	32033899	32034560	661	FALSE
C19orf18	-0.268392	0.805323	0.668614	-29.7855	cg02449608	NM_152474.2	GeneID:147685	19	63178412	63177716	696	FALSE
CSPG3	-0.268733	0.776868	0.644838	-25.0212	cg13118849	NM_004386.1	GeneID:1463	19	19188542	19188762	220	FALSE
SHRM	-0.26962	0.66623	0.552663	-13.6803	cg14898892	NM_020859.1	GeneID:57619	4	77575204	77575277	73	FALSE
KRTAP9-3	-0.269768	0.74708	0.619668	-21.1911	cg11710560	NM_031962.2	GeneID:83900	17	36642670	36642241	429	FALSE
GLIS1	-0.269852	0.801488	0.664758	-29.3577	cg06941093	NM_147193.1	GeneID:148979	1	53972284	53972465	181	FALSE
DNAJC5B	-0.269957	0.663113	0.549949	-13.4909	cg13760253	NM_033105.3	GeneID:85479	8	67095254	67096349	1095	FALSE
EPPB9	-0.271577	0.795079	0.658654	-28.4792	cg02629257	NM_015681.2	GeneID:27077	17	19212220	19211551	669	FALSE
ROS1	-0.272256	0.714266	0.591429	-17.9991	cg21166999	NM_002944.2	GeneID:6098	6	117853486	117853711	225	FALSE
NPDC1	-0.274014	0.700497	0.579322	-16.8865	cg26581729	NM_015392.2	GeneID:56654	9	139059613	139060476	863	TRUE	9:139059540-139061122
AKR1D1	-0.274048	0.675031	0.558248	-14.7452	cg20647137	NM_005989.2	GeneID:6718	7	137411829	137411736	93	FALSE
KCTD17	-0.2741	0.658377	0.544455	-13.5821	cg22229142	NM_024681.1	GeneID:79734	22	35777252	35777562	310	TRUE	22:35777251-35778239
FLJ37587	-0.274793	0.706773	0.584197	-17.5928	cg01703884	NM_173597.1	GeneID:283446	12	108362557	108362755	198	TRUE	12:108362343-108362608
LOC92017	-0.275828	0.71011	0.586534	-18.0463	cg10240083	NM_001009607.1	GeneID:92017	16	12515883	12516525	642	FALSE
C2	-0.276182	0.735909	0.607694	-20.8198	cg14301635	NM_000063.3	GeneID:717	6	32003182	32003473	291	FALSE
C7orf34	-0.276206	0.686894	0.56721	-15.9629	cg22298208	NM_178829.2	GeneID:135927	7	142345733	142346721	988	FALSE
PSTPIP1	-0.27683	0.714948	0.59012	-18.6603	cg12703269	NM_003978.2	GeneID:9051	15	75073287	75074609	1322	FALSE
MGMT	-0.277986	0.795581	0.656149	-29.789	cg00904483	NT_008818.15	GeneID:4255	10	131244863			TRUE	10:131244704-131245359
STATH	-0.278746	0.736146	0.60681	-21.181	cg00436282	NM_003154.2	GeneID:6779	4	70896038	70896237	199	FALSE
C10orf129	-0.27917	0.716677	0.590589	-19.1225	cg12647587	NM_207321.1	GeneID:142827	10	96944242	96943947	295	FALSE
ATP1A4	-0.279723	0.729933	0.601281	-20.6265	cg19250891	NM_144699.2	GeneID:480	1	158388036	158387987	49	FALSE
CRYGA	-0.28016	0.647854	0.533507	-13.4603	cg17055734	NM_014617.2	GeneID:1418	2	208736304	208736633	329	TRUE	2:208736106-208736449
TP73	-0.280624	0.82155	0.676328	-35.727	cg03568718	NT_004321.17	GeneID:7161	1	3569733			TRUE	1:3569653-3570185
ABCA4	-0.281466	0.859214	0.706922	-46.1732	cg04592706	NM_000350.1	GeneID:24	1	94359180	94359267	87	FALSE
SLC24A5	-0.281479	0.835153	0.68712	-39.256	cg19409156	NM_205850.1	GeneID:283652	15	46200332	46200461	129	FALSE
MRGPRX4	-0.282477	0.648166	0.532908	-13.7131	cg09691574	NM_054032.2	GeneID:117196	11	18150250	18150960	710	FALSE
KRTAP5-9	-0.283247	0.841221	0.691265	-41.2831	cg26832211	NM_005553.2	GeneID:3846	11	70936899	70937114	215	FALSE
KCNJ16	-0.283358	0.648403	0.532777	-13.8017	cg26960719	NM_170741.1	GeneID:3773	17	65582897	65583021	124	FALSE
LTB	-0.283466	0.655462	0.538538	-14.2916	cg18656170	NM_002341.1	GeneID:4050	6	31659404	31658181	1223	FALSE
RUNX3	-0.283762	0.724843	0.59542	-20.6142	cg02723372	NT_004610.18	GeneID:864	1	25101169			TRUE	1:25101076-25101799
RGS3	-0.283941	0.844383	0.693529	-42.3034	cg19944367	NM_134427.1	GeneID:5998	9	115263596	115264200	604	FALSE
ALPK1	-0.284179	0.759194	0.623456	-24.9442	cg24866437	NM_025144.2	GeneID:80216	4	113518456	113518301	155	FALSE
FLJ20581	-0.284272	0.653295	0.536457	-14.2221	cg04428453	NM_017888.2	GeneID:54988	16	20328153	20328357	204	TRUE	16:20327801-20328182
BNC2	-0.285035	0.723609	0.593882	-20.6384	cg14613546	NM_017637.4	GeneID:54796	9	16719103	16717995	1108	FALSE
IL18R1	-0.285082	0.806046	0.661519	-33.2032	cg17869167	NM_003855.2	GeneID:8809	2	102346136	102345529	607	FALSE
GRIP1	-0.286081	0.684333	0.56124	-16.8695	cg09414535	XM_934800.1	GeneID:23426	12	65359289	65359186	103	FALSE
FXYD3	-0.286667	0.727783	0.596632	-21.3157	cg02633817	NM_021910.1	GeneID:5349	19	40298572	40298639	67	FALSE
MGMT	-0.286949	0.864715	0.70875	-49.5	cg03271907	NT_008818.15	GeneID:4255	10	131302633			TRUE	10:131302456-131302963
DSCR1L1	-0.288024	0.804457	0.658869	-33.4571	cg17142149	NM_005822.1	GeneID:10231	6	46400975	46401364	389	FALSE
FUT7	-0.288253	0.641142	0.525027	-13.7879	cg09305224	NM_004479.2	GeneID:2529	9	139047066	139047283	217	FALSE
MORC1	-0.288651	0.826854	0.676918	-38.7468	cg04167867	NM_014429.2	GeneID:27136	3	110319820	110319658	162	TRUE	3:110319373-110319935
GCKR	-0.289243	0.776682	0.635584	-28.489	cg20022122	NM_001486.2	GeneID:2646	2	27573626	27573210	416	FALSE
FOXI1	-0.289735	0.710333	0.581089	-19.8167	cg19233472	NM_012188.3	GeneID:2299	5	169465330	169465495	165	TRUE	5:169465139-169465394
MUC15	-0.290457	0.835777	0.683367	-41.4722	cg16215361	NM_145650.2	GeneID:143662	11	26551196	26550356	840	FALSE
FLJ31222	-0.290543	0.815584	0.666817	-36.426	cg15140807	NM_207388.1	GeneID:388387	17	38304736	38304247	489	FALSE
CD69	-0.291133	0.694608	0.567675	-18.4539	cg05590294	NM_001781.1	GeneID:969	12	9804662	9804764	102	FALSE
S100A1	-0.291473	0.740979	0.60543	-23.616	cg14467840	NM_006271.1	GeneID:6271	1	151867596	151867497	99	FALSE
MUC5B	-0.291536	0.697275	0.569695	-18.7616	cg22407504	XM_039877.12	GeneID:4587	11	1199666	1200930	1264	TRUE	11:1199482-1199813
KCNJ1	-0.293044	0.741559	0.605245	-23.9023	cg05193832	NM_000220.2	GeneID:3758	11	128242054	128242478	424	FALSE
INSL4	-0.293088	0.778795	0.635616	-29.5618	cg12067261	NM_002195.1	GeneID:3641	9	5221539	5221419	120	FALSE
ABLIM1	-0.293301	0.705722	0.575893	-19.7943	cg05064181	NM_002313.5	GeneID:3983	10	116435388	116434404	984	FALSE
MGMT	-0.294363	0.81454	0.664202	-37.008	cg02330106	NM_002412.2	GeneID:4255	10	131154830	131155456	626	TRUE	10:131154808-131155770
VPREB3	-0.294626	0.682186	0.556175	-17.7013	cg26574610	NM_013378.1	GeneID:29802	22	22425989	22426592	603	FALSE
KCNQ1	-0.294737	0.688028	0.560895	-18.2599	cg26750319	NT_009237.17	GeneID:3784	11	2550536			TRUE	11:2550370-2550883
KCNE2	-0.295349	0.650827	0.530343	-15.1379	cg04409427	NM_172201.1	GeneID:9992	21	34657893	34658193	300	FALSE
AVP	-0.295683	0.727307	0.592527	-22.5362	cg16536918	NM_000490.3	GeneID:551	20	3013403	3013370	33	FALSE
GABRG3	-0.296394	0.627517	0.510978	-13.6562	cg27592112	NM_033223.1	GeneID:2567	15	25343690	25343765	75	FALSE
C12orf40	-0.296731	0.676181	0.550475	-17.408	cg22941086	NM_173599.1	GeneID:283461	12	38306150	38306252	102	TRUE	12:38306053-38306365
B3GALT1	-0.296808	0.78463	0.638729	-31.2662	cg25427580	NM_020981.2	GeneID:8708	2	168383603	168383428	175	TRUE	2:168383423-168383626
FLJ30046	-0.297068	0.654089	0.532366	-15.5728	cg19782598	NM_144595.2	GeneID:122060	13	77213286	77213490	204	FALSE
HSDL1	-0.297803	0.698102	0.567899	-19.5873	cg26359240	NM_031463.3	GeneID:83693	16	82737460	82736265	1195	FALSE
VNN2	-0.298262	0.737313	0.599606	-24.1254	cg10044101	NM_004665.2	GeneID:8875	6	133125982	133126291	309	FALSE
HSD17B1	-0.300032	0.803417	0.652563	-35.727	cg26729026	NM_000413.1	GeneID:3292	17	37957989	37957510	479	FALSE
FRMD4A	-0.300225	0.617322	0.501343	-13.3408	cg25464840	NM_018027.2	GeneID:55691	10	14412916	14412889	27	FALSE
LOC124220	-0.300361	0.626662	0.508881	-13.9481	cg05461841	NM_145252.1	GeneID:124220	16	2819945	2820234	289	FALSE
C16orf44	-0.300545	0.87256	0.708471	-56.0233	cg23617760	NM_024731.2	GeneID:79786	16	83239008	83239632	624	FALSE
FAM71A	-0.300557	0.627387	0.5094	-14.0161	cg10531372	NM_153606.1	GeneID:149647	1	210864986	210864439	547	TRUE	1:210864887-210865172
SULT2B1	-0.300965	0.813347	0.660201	-38.1537	cg00698688	NM_177973.1	GeneID:6820	19	53747244	53747241	3	FALSE
TBC1D5	-0.301595	0.661454	0.536674	-16.6766	cg01765641	NM_014744.1	GeneID:9779	3	17756892	17757403	511	TRUE	3:17756160-17756911
GCNT3	-0.301682	0.679779	0.551508	-18.3158	cg06817269	NM_004751.1	GeneID:9245	15	57696327	57696080	247	FALSE
SAG	-0.301699	0.683045	0.554152	-18.6235	cg08096010	NM_000541.2	GeneID:6295	2	233881301	233881232	69	FALSE
VNN1	-0.305458	0.71855	0.58144	-22.83	cg00852964	NM_004666.1	GeneID:8876	6	133076843	133076881	38	FALSE
PLCB2	-0.306742	0.807174	0.652572	-37.9243	cg02240622	NM_004573.1	GeneID:5330	15	38388759	38387330	1429	FALSE
NSDHL	-0.306983	0.783924	0.63367	-33.0394	cg10634358	NM_015922.1	GeneID:50814	X	151748838	151750167	1329	FALSE
GP9	-0.308751	0.718457	0.580039	-23.2858	cg16098726	NM_000174.2	GeneID:2815	3	130261428	130262335	907	TRUE	3:130261348-130261588
FLJ25084	-0.308926	0.756549	0.610719	-28.5385	cg09948350	NM_152792.1	GeneID:151516	2	70042596	70042901	305	FALSE
INPP5D	-0.309461	0.661646	0.533911	-17.5733	cg07026910	NM_001017915.1	GeneID:3635	2	233734760	233734415	345	FALSE
LY6G6C	-0.309687	0.633044	0.510751	-15.2673	cg11328149	NM_025261.1	GeneID:80740	6	31797438	31797489	51	FALSE
KRT25A	-0.311579	0.7217	0.581516	-24.0455	cg22983092	NM_181534.2	GeneID:147183	17	36165064	36165091	27	FALSE
GPR19	-0.311793	0.831687	0.67004	-45.3022	cg14059963	NM_006143.1	GeneID:2842	12	12706293	12706671	378	TRUE	12:12706085-12706362
MGMT	-0.312032	0.738767	0.595082	-26.3961	cg26201213	NM_002412.2	GeneID:4255	10	131155786	131155456	330	FALSE
IL8RB	-0.313291	0.759428	0.61119	-29.789	cg13739417	NM_001557.2	GeneID:3579	2	218698872	218698991	119	FALSE
GATA1	-0.314185	0.696474	0.560177	-21.4694	cg00536175	NM_002049.2	GeneID:2623	X	48529968	48529906	62	FALSE
CDH20	-0.314536	0.680668	0.547332	-19.8942	cg18509435	NM_031891.2	GeneID:28316	18	57308859	57308755	104	TRUE	18:57308846-57309047
HAO1	-0.315581	0.624352	0.501684	-15.2015	cg25157408	NM_017545.2	GeneID:54363	20	7869059	7869093	34	FALSE
FUT7	-0.315859	0.81093	0.651479	-40.8003	cg02679745	NM_004479.2	GeneID:2529	9	139047467	139047283	184	FALSE
CRISP1	-0.315966	0.749118	0.601776	-28.5355	cg04201526	NM_001131.2	GeneID:167	6	49941665	49942177	512	FALSE
ANGPTL6	-0.316213	0.789943	0.634463	-36.0748	cg12593411	NM_031917.2	GeneID:83854	19	10074722	10074425	297	FALSE
C6orf25	-0.316559	0.629911	0.505807	-15.726	cg14437986	NM_025260.2	GeneID:80739	6	31799014	31799140	126	TRUE	6:31798937-31799213
NTNG2	-0.317488	0.691657	0.555031	-21.3748	cg08108641	NM_032536.1	GeneID:84628	9	134031851	134031955	104	TRUE	9:134031771-134032082
RAB25	-0.317521	0.625095	0.501606	-15.4501	cg09243900	NM_020387.1	GeneID:57111	1	154297468	154297606	138	FALSE
ADAMDEC1	-0.317774	0.595879	0.478078	-13.5398	cg13059335	NM_014479.2	GeneID:27299	8	24298054	24297916	138	FALSE
SETBP1	-0.318491	0.82275	0.65977	-44.3825	cg27378216	NM_015559.1	GeneID:26040	18	40535169	40535467	298	FALSE
LOC346673	-0.318986	0.699826	0.561003	-22.5086	cg18152517	NM_182489.1	GeneID:346673	7	134566296	134567271	975	FALSE
CDH16	-0.318999	0.645024	0.517068	-17.1929	cg14221831	NM_004062.2	GeneID:1014	16	65510215	65510267	52	FALSE
MGMT	-0.319264	0.710226	0.569231	-23.7161	cg20778669	NT_008818.15	GeneID:4255	10	131245207			TRUE	10:131244704-131245359
F9	-0.321424	0.629151	0.503497	-16.1709	cg10339201	NM_000133.2	GeneID:2158	X	138440596	138440561	35	FALSE
C6orf54	-0.3215	0.633711	0.507119	-16.5549	cg11251877	NM_014354.1	GeneID:26236	6	168141830	168140606	1224	FALSE
CYP2W1	-0.321782	0.626509	0.501258	-15.9996	cg22025233	NM_017781.2	GeneID:54905	7	989430	989361	69	TRUE	7:989428-989683
RGS3	-0.322572	0.630509	0.504182	-16.416	cg26354398	NM_134427.1	GeneID:5998	9	115263857	115264200	343	FALSE
CCL2	-0.323556	0.775825	0.61996	-34.5697	cg21109025	NM_002982.3	GeneID:6347	17	29604982	29606409	1427	FALSE
ABCB4	-0.324025	0.689384	0.550706	-21.9751	cg04737046	NM_018849.1	GeneID:5244	7	86947306	86947684	378	FALSE
FSD1	-0.324711	0.650571	0.519454	-18.297	cg20789620	NM_024333.1	GeneID:79187	19	4255334	4255691	357	FALSE
FAM112B	-0.324948	0.669163	0.534211	-19.9997	cg20576002	NM_144594.1	GeneID:121355	12	53153920	53153618	302	FALSE
GJB4	-0.325421	0.605949	0.483587	-14.8391	cg15750705	NM_153212.1	GeneID:127534	1	34999294	34999365	71	FALSE
TSPAN18	-0.325812	0.78635	0.627389	-37.1523	cg09390792	NM_130783.2	GeneID:90139	11	44838020	44837628	392	FALSE
DLK1	-0.325889	0.712789	0.568668	-24.9437	cg06504820	NT_026437.11	GeneID:8788	14	100262026			TRUE	14:100261944-100263514
FLJ45202	-0.325954	0.578813	0.46176	-13.1905	cg05364569	NM_207507.1	GeneID:401508	9	65233610	65234068	458	FALSE
R3HDML	-0.326378	0.622974	0.496845	-16.194	cg01255591	NM_178491.2	GeneID:140902	20	42399124	42399040	84	FALSE
PGBD5	-0.326699	0.804456	0.64144	-41.4732	cg01671575	NM_024554.2	GeneID:79605	1	228580189	228579990	199	FALSE
FNDC7	-0.32753	0.769932	0.613558	-34.18	cg03301801	NM_173532.1	GeneID:163479	1	109065806	109066556	750	FALSE
SRI	-0.328308	0.661843	0.527138	-19.6991	cg16639595	NM_198901.1	GeneID:6717	7	87694920	87694244	676	FALSE
K6HF	-0.328724	0.752559	0.599218	-31.2342	cg20256783	NM_004693.1	GeneID:9119	12	51114114	51114373	259	FALSE
CLDN9	-0.329837	0.617956	0.491662	-16.1547	cg03038672	NM_020982.2	GeneID:9080	16	3002057	3002207	150	FALSE
RIT2	-0.330192	0.724757	0.576494	-27.1841	cg04711324	NM_002930.1	GeneID:6014	18	38949631	38949655	24	TRUE	18:38949361-38949658
ERV3	-0.330292	0.784789	0.624202	-37.719	cg19393233	NM_001007253.1	GeneID:2086	7	64090437	64090719	282	FALSE
HPS4	-0.3309	0.660809	0.52537	-19.8942	cg19831369	NM_022081.4	GeneID:89781	22	25211026	25209820	1206	FALSE
FLJ40919	-0.331233	0.574096	0.456324	-13.343	cg07409200	NM_182508.1	GeneID:144809	13	42252674	42253751	1077	FALSE
GK2	-0.331516	0.748244	0.59463	-30.979	cg14078518	NM_033214.2	GeneID:2712	4	80548308	80548396	88	FALSE
DAB2IP	-0.331602	0.632534	0.502645	-17.4933	cg15686608	NT_008470.18	GeneID:153090	9	123500829			TRUE	9:123500662-123502056
SAA2	-0.332629	0.601653	0.477766	-15.2015	cg12907644	NM_030754.2	GeneID:6289	11	18226917	18226744	173	FALSE
PPAN	-0.332715	0.854572	0.678565	-58.1366	cg12819826	NM_020230.4	GeneID:56342	19	10077676	10077965	289	TRUE	19:10077585-10078919
CD3D	-0.332823	0.57273	0.454737	-13.3966	cg24841244	NM_000732.3	GeneID:915	11	117718540	117718533	7	FALSE
JOSD3	-0.333397	0.600645	0.476711	-15.2015	cg26570233	NM_024116.1	GeneID:79101	11	93115610	93114308	1302	FALSE
TMEM16G	-0.334172	0.765232	0.607012	-34.4942	cg04415689	NM_001001666.1	GeneID:50636	2	241776923	241776597	326	FALSE
ATP10A	-0.334348	0.586639	0.465288	-14.3594	cg10734665	NT_026446.13	GeneID:57194	15	23658503			TRUE	15:23658498-23660531
MPPED1	-0.334732	0.724509	0.574486	-27.8216	cg02261346	NM_001585.2	GeneID:758	22	42229926	42229853	73	FALSE
ALOX12B	-0.334863	0.576021	0.456703	-13.771	cg00501366	NM_001139.1	GeneID:242	17	7933201	7931746	1455	FALSE
TJP3	-0.335419	0.618149	0.489917	-16.7107	cg12850636	NM_014428.1	GeneID:27134	19	3678602	3679374	772	FALSE
TGIF2LX	-0.335813	0.589572	0.46714	-14.6574	cg19140639	NM_138960.3	GeneID:90316	X	89063362	89063596	234	FALSE
MGMT	-0.336537	0.707943	0.560648	-25.8432	cg07453748	NT_008818.15	GeneID:4255	10	131245292			TRUE	10:131244704-131245359
FLJ35816	-0.337495	0.561431	0.444324	-13.104	cg03044435	NM_207489.1	GeneID:401114	4	1134077	1135160	1083	FALSE
FLJ45202	-0.338313	0.590312	0.466917	-14.9298	cg26776077	NM_207507.1	GeneID:401508	9	65233711	65234068	357	FALSE
XCR1	-0.339228	0.579137	0.457787	-14.3021	cg01442426	NM_005283.2	GeneID:2829	3	46044370	46043983	387	FALSE
DIRAS3	-0.339528	0.587479	0.464285	-14.8452	cg09118625	NT_032977.8	GeneID:9077	1	68285559			TRUE	1:68285082-68285689
MGMT	-0.340579	0.660515	0.521625	-20.989	cg10333959	NT_008818.15	GeneID:4255	10	131244930			TRUE	10:131244704-131245359
DENND2D	-0.342124	0.630713	0.497556	-18.4538	cg24641737	NM_024901.3	GeneID:79961	1	111544794	111544804	10	FALSE
CTAG2	-0.342562	0.554576	0.437361	-13.104	cg13726507	NM_020994.2	GeneID:30848	X	153536512	153535036	1476	TRUE	X:153536438-153536702
RP11-450P7.3	-0.344159	0.870574	0.685809	-67.6948	cg04488527	NM_153270.1	GeneID:257240	X	21585788	21586369	581	TRUE	X:21583682-21587167
EVL	-0.345394	0.763634	0.601051	-36.2156	cg17813891	NM_016337.2	GeneID:51466	14	99601789	99601504	285	FALSE
LCN1	-0.345511	0.594535	0.467917	-15.9088	cg10248727	NM_002297.2	GeneID:3933	9	137553145	137553107	38	FALSE
AZGP1	-0.345771	0.631743	0.497111	-18.9255	cg19465374	NM_001185.2	GeneID:563	7	99411214	99411623	409	FALSE
XPNPEP1	-0.345867	0.551731	0.434121	-13.1974	cg17093267	NM_020383.2	GeneID:7511	10	111673644	111673192	452	TRUE	10:111672594-111673812
TYR	-0.346549	0.642245	0.505102	-19.9099	cg03417466	NM_000372.3	GeneID:7299	11	88550066	88550688	622	FALSE
GPR154	-0.346972	0.552878	0.434691	-13.3506	cg06506864	NM_207173.1	GeneID:387129	7	34664713	34664422	291	FALSE
LALBA	-0.347043	0.809646	0.636539	-47.2021	cg14338548	NM_002289.2	GeneID:3906	12	47249898	47250096	198	FALSE
CLCN1	-0.347351	0.833213	0.654927	-54.4388	cg17922226	NM_000083.1	GeneID:1180	7	142723736	142723341	395	FALSE
FFAR2	-0.347533	0.704048	0.55333	-26.8784	cg15479752	NM_005306.1	GeneID:2867	19	40632702	40632457	245	TRUE	19:40632541-40633082
LYAR	-0.347874	0.57122	0.448831	-14.5114	cg02142461	NM_017816.1	GeneID:55646	4	4343980	4342744	1236	FALSE
GPR142	-0.348514	0.65723	0.516184	-21.5785	cg22377428	NM_181790.1	GeneID:350383	17	69875477	69875240	237	FALSE
F11	-0.349718	0.633015	0.496751	-19.4222	cg24529858	NM_000128.2	GeneID:2160	4	187423943	187424272	329	FALSE
P53AIP1	-0.350021	0.791263	0.620804	-43.147	cg25022327	NM_022112.1	GeneID:63970	11	128317672	128318032	360	TRUE	11:128317441-128317839
SP6	-0.350518	0.779028	0.610994	-40.4559	cg27210136	NM_199262.2	GeneID:80320	17	43287640	43288239	599	FALSE
UBL4A	-0.351461	0.745173	0.584059	-33.8135	cg23232084	NM_014235.2	GeneID:8266	X	153368803	153368126	677	FALSE
NECAP1	-0.352094	0.64287	0.503654	-20.6142	cg23205183	NM_015509.2	GeneID:25977	12	8107376	8107937	561	FALSE
RHOH	-0.352097	0.572216	0.4483	-14.9298	cg00804392	NM_004310.2	GeneID:399	4	39874990	39874997	7	TRUE	4:39874836-39875043
FLJ25102	-0.352339	0.672458	0.526745	-23.6548	cg06785822	NM_182626.1	GeneID:348738	2	10198781	10198960	179	FALSE
GABRP	-0.352892	0.633376	0.495942	-19.7943	cg21652012	NM_014211.1	GeneID:2568	5	170143587	170143343	244	FALSE
MARCH1	-0.353559	0.576996	0.451587	-15.3908	cg17271365	NM_017923.2	GeneID:55016	4	164754202	164754226	24	FALSE
GABRA6	-0.353745	0.612429	0.479257	-18.1043	cg07592353	NM_000811.1	GeneID:2559	5	161045917	161045548	369	FALSE
IL1A	-0.354398	0.822956	0.643713	-52.8276	cg27083787	NM_000575.3	GeneID:3552	2	113259716	113259442	274	FALSE
ADAMDEC1	-0.35508	0.616379	0.481901	-18.582	cg14143055	NM_014479.2	GeneID:27299	8	24296542	24297916	1374	FALSE
SERPINA13	-0.355759	0.560578	0.438069	-14.4867	cg17291001	NM_207378.1	GeneID:388007	14	94177379	94176815	564	FALSE
CYP11A1	-0.356264	0.62562	0.488725	-19.4563	cg17790333	NM_000781.1	GeneID:1583	15	72447318	72447020	298	FALSE
FOXP3	-0.357628	0.604644	0.471892	-17.8766	cg08884343	NM_014009.2	GeneID:50943	X	49009367	49008232	1135	FALSE
HLA-DOB	-0.359666	0.618121	0.48173	-19.1674	cg17103109	NM_002120.2	GeneID:3112	6	32893119	32892762	357	FALSE
NEBL	-0.360586	0.564615	0.43975	-15.1508	cg24625388	NM_213569.1	GeneID:10529	10	21503864	21503122	742	TRUE	10:21502013-21503883
OPN1MW	-0.361186	0.614855	0.478679	-19.0597	cg06325687	NM_000513.1	GeneID:2652	X	153102151	153101361	790	FALSE
MS4A4A	-0.361468	0.759124	0.590881	-38.2809	cg03634982	NM_024021.2	GeneID:51338	11	59804555	59804715	160	FALSE
KRTAP10-8	-0.362671	0.591439	0.459976	-17.309	cg17778867	NM_198695.1	GeneID:386681	21	44856454	44856424	30	FALSE
HIST1H2AA	-0.362912	0.74384	0.578406	-35.5992	cg01307730	NM_170745.3	GeneID:221613	6	25834576	25834769	193	TRUE	6:25834320-25834896
USP54	-0.363099	0.648014	0.503826	-22.3708	cg21194776	NM_152586.2	GeneID:159195	10	74984134	74983104	1030	FALSE
IL1R1	-0.363307	0.695678	0.540807	-27.9535	cg26657648	NM_000877.2	GeneID:3554	2	102136143	102136834	691	FALSE
KRTHA6	-0.365377	0.710215	0.551316	-30.3693	cg04618528	NM_003771.3	GeneID:8689	17	36899402	36899642	240	TRUE	17:36899183-36899440
C15orf32	-0.367431	0.540893	0.41928	-14.2221	cg25455753	NM_153040.1	GeneID:145858	15	90815974	90815911	63	FALSE
KIAA0406	-0.367458	0.554014	0.429442	-15.0227	cg26746469	NM_014657.1	GeneID:9675	20	36096704	36095247	1457	FALSE
IL1F7	-0.367996	0.55054	0.42659	-14.8448	cg10269439	NM_014439.3	GeneID:27178	2	113387053	113387019	34	FALSE
H2BFS	-0.368459	0.704426	0.545655	-29.9691	cg25023829	NM_017445.1	GeneID:54145	21	43809919	43809548	371	TRUE	21:43809403-43810034
RGSL1	-0.368514	0.641019	0.496521	-22.2782	cg16478792	NM_181572.2	GeneID:353299	1	180724885	180724041	844	FALSE
PLCL1	-0.369349	0.587618	0.454894	-17.6489	cg27609819	NM_006226.1	GeneID:5334	2	198524422	198523731	691	FALSE
MS4A7	-0.369664	0.530746	0.410778	-13.7993	cg10853416	NM_021201.4	GeneID:58475	11	59901851	59902534	683	FALSE
CD22	-0.370667	0.570875	0.441529	-16.5202	cg15743985	NM_001771.1	GeneID:933	19	40511649	40511953	304	TRUE	19:40511606-40511808
SLC17A3	-0.370926	0.531871	0.411288	-13.952	cg15691649	NM_006632.1	GeneID:10786	6	25990307	25990493	186	TRUE	6:25990159-25990690
CXorf48	-0.371121	0.739744	0.571956	-36.2167	cg15741706	NM_017863.2	GeneID:54967	X	134134072	134133417	655	FALSE
CCDC48	-0.371261	0.518729	0.401033	-13.2202	cg24287460	NM_024768.1	GeneID:79825	3	130230716	130231982	1266	TRUE	3:130230544-130230763
CTLA4	-0.371954	0.766455	0.592266	-41.7628	cg08460026	NM_005214.2	GeneID:1493	2	204440719	204440756	37	FALSE
CD1D	-0.374373	0.554395	0.427683	-15.6483	cg17399166	NM_001766.2	GeneID:912	1	156416419	156416361	58	FALSE
ARPM2	-0.375176	0.645623	0.497783	-23.5037	cg14365123	NM_080431.3	GeneID:140625	1	2928106	2927926	180	FALSE
ZNF185	-0.375881	0.583543	0.449699	-17.9552	cg26872564	NM_007150.1	GeneID:7739	X	151837292	151837321	29	FALSE
EDNRB	-0.378103	0.733286	0.564226	-36.2167	cg18003135	NM_003991.1	GeneID:1910	13	77447658	77447665	7	FALSE
TNFSF14	-0.378426	0.526347	0.404906	-14.1976	cg05348870	NM_003807.2	GeneID:8740	19	6622045	6621599	446	FALSE
CXorf20	-0.378822	0.508959	0.391423	-13.2186	cg19845843	NM_153346.2	GeneID:139105	X	18149203	18148924	279	TRUE	X:18146563-18149630
CCL17	-0.379222	0.642855	0.49426	-23.6674	cg07634706	NM_002987.2	GeneID:6361	16	55996025	55996180	155	FALSE
DAPK1	-0.380407	0.544413	0.41823	-15.4625	cg24754277	NT_023935.17	GeneID:1612	9	89303976			TRUE	9:89301899-89304060
SLC3A1	-0.381069	0.640262	0.491637	-23.616	cg02192965	NM_000341.2	GeneID:6519	2	44356244	44356103	141	FALSE
KIAA1984	-0.382178	0.653322	0.50128	-25.1613	cg19795898	NM_032874.2	GeneID:84960	9	138813017	138813688	671	FALSE
ARHGEF9	-0.382725	0.502269	0.385234	-13.1257	cg11291009	NM_015185.1	GeneID:23229	X	62891792	62891718	74	TRUE	X:62891021-62892044
CCND1	-0.384585	0.725122	0.555443	-35.8821	cg00953256	NT_078088.3	GeneID:595	11	69178056			TRUE	11:69177944-69178494
FCGBP	-0.386145	0.548647	0.419809	-16.2689	cg24030627	NM_003890.1	GeneID:8857	19	45132256	45132373	117	FALSE
NDUFS5	-0.386663	0.522751	0.399851	-14.5782	cg07388493	NM_004552.1	GeneID:4725	1	39264046	39264593	547	FALSE
SCN2B	-0.387044	0.546036	0.417551	-16.1614	cg26502489	NM_004588.3	GeneID:6327	11	117553756	117552546	1210	FALSE
CCNB3	-0.387108	0.705467	0.539443	-32.9422	cg09555679	NM_033031.1	GeneID:85417	X	50044346	50044276	70	FALSE
FLJ30046	-0.387502	0.803214	0.614019	-54.5317	cg08504583	NM_144595.2	GeneID:122060	13	77213585	77213490	95	FALSE
SGCD	-0.387601	0.618014	0.47241	-22.1096	cg03811411	NM_000337.4	GeneID:6444	5	155686194	155686345	151	FALSE
OFD1	-0.389278	0.513052	0.391721	-14.2132	cg24352688	NM_003611.1	GeneID:8481	X	13661648	13662801	1153	FALSE
MAPK8	-0.390132	0.756437	0.577207	-43.0225	cg19612574	NM_002750.2	GeneID:5599	10	49278958	49279693	735	FALSE
PLXNA3	-0.39186	0.598308	0.455998	-20.7222	cg07428182	NM_017514.2	GeneID:55558	X	153340120	153339817	303	TRUE	X:153339050-153340379
SCO1	-0.391861	0.53846	0.410385	-16.038	cg12478185	NM_004589.1	GeneID:6341	17	10542726	10541562	1164	FALSE
SLC22A9	-0.393176	0.558232	0.425066	-17.5836	cg23683201	NM_080866.2	GeneID:114571	11	62893728	62893837	109	FALSE
CCR8	-0.393511	0.537204	0.40896	-16.0931	cg23519969	NM_005201.2	GeneID:1237	3	39346801	39346219	582	FALSE
IL16	-0.393598	0.572352	0.435691	-18.7262	cg09837803	NM_004513.3	GeneID:3603	15	79261396	79262255	859	FALSE
GP2	-0.394683	0.532226	0.404841	-15.8379	cg12554476	NM_001007240.1	GeneID:2813	16	20246309	20246336	27	FALSE
SLC2A9	-0.394839	0.628625	0.478116	-23.9434	cg26409237	NM_020041.2	GeneID:56606	4	9650098	9650970	872	FALSE
ABP1	-0.395249	0.506218	0.384907	-14.2355	cg13603551	NM_001091.2	GeneID:26	7	150180339	150180506	167	FALSE
FGR	-0.39552	0.589741	0.44833	-20.3254	cg06827976	NM_005248.1	GeneID:2268	1	27823176	27823160	16	FALSE
MGC33367	-0.396003	0.723017	0.549465	-37.3757	cg07804582	NM_144602.2	GeneID:123970	16	47964687	47965309	622	FALSE
TRPM6	-0.396977	0.541785	0.411457	-16.7003	cg16509045	NM_017662.3	GeneID:140803	9	76692783	76692830	47	FALSE
OLFM4	-0.397812	0.516928	0.392353	-15.0582	cg10246520	NM_006418.3	GeneID:10562	13	52499945	52500973	1028	FALSE
TYRP1	-0.399252	0.679649	0.515345	-30.7991	cg25989745	NM_000550.1	GeneID:7306	9	12683326	12683449	123	FALSE
LOC202459	-0.399276	0.749522	0.568316	-43.2055	cg11456838	NM_145303.1	GeneID:202459	6	159198742	159198654	88	FALSE
PAEP	-0.399646	0.572647	0.434092	-19.2834	cg03264414	NM_001018049.1	GeneID:5047	9	137593518	137593425	93	FALSE
STAR	-0.400322	0.625519	0.473949	-24.2461	cg09793866	NM_001007243.1	GeneID:6770	8	38128705	38127757	948	TRUE	8:38128618-38128820
FLJ00060	-0.40034	0.641852	0.486318	-26.0533	cg25033144	NM_033206.1	GeneID:90011	19	59740102	59739982	120	FALSE
NALP12	-0.40096	0.616076	0.466588	-23.3681	cg07042144	NM_033297.1	GeneID:91662	19	59019216	59019404	188	FALSE
ABCC11	-0.40249	0.546721	0.413623	-17.5454	cg08446111	NM_033151.2	GeneID:85320	16	46836929	46835634	1295	FALSE
TUB	-0.402855	0.628878	0.475658	-24.899	cg05492113	NM_177972.1	GeneID:7275	11	8016908	8016756	152	FALSE
MGC13034	-0.402948	0.689009	0.521105	-32.7599	cg05731779	NM_153217.1	GeneID:134288	5	72499443	72499830	387	FALSE
ANKRD7	-0.403142	0.754277	0.570392	-44.9959	cg16192029	NM_019644.1	GeneID:56311	7	117651910	117652195	285	TRUE	7:117651804-117652144
PRRG3	-0.406094	0.478441	0.361062	-13.422	cg02020018	NM_024082.2	GeneID:79057	X	150616766	150617435	669	FALSE
SALL4	-0.408112	0.528581	0.398343	-16.6976	cg06303238	NM_020436.2	GeneID:57167	20	49852366	49852421	55	TRUE	20:49850215-49852803
HYAL4	-0.408224	0.485519	0.365863	-13.952	cg05341115	NM_012269.1	GeneID:23553	7	123272827	123272459	368	FALSE
MYH2	-0.408309	0.494203	0.372385	-14.4437	cg18432105	NM_017534.3	GeneID:4620	17	10394235	10393704	531	FALSE
C12orf50	-0.408544	0.567105	0.427247	-19.6675	cg13976438	NM_152589.1	GeneID:160419	12	86947207	86947307	100	FALSE
KCNA10	-0.408738	0.540047	0.406808	-17.5848	cg07830847	NM_005549.2	GeneID:3744	1	110862897	110863320	423	FALSE
CD80	-0.408884	0.486949	0.366773	-14.0847	cg06509940	NM_005191.2	GeneID:941	3	120761604	120761139	465	FALSE
MT4	-0.409058	0.59855	0.450777	-22.5267	cg02552572	NM_032935.1	GeneID:84560	16	55155247	55156542	1295	FALSE
K6IRS3	-0.409663	0.613624	0.461936	-24.0455	cg13928961	NM_175068.2	GeneID:319101	12	51298276	51298610	334	FALSE
LOXHD1	-0.410179	0.513815	0.386661	-15.8414	cg17903316	NM_144612.4	GeneID:125336	18	42435658	42435624	34	FALSE
KCNK16	-0.410272	0.543711	0.409132	-17.9913	cg14948436	NM_032115.2	GeneID:83795	6	39398137	39398294	157	FALSE
SULT1B1	-0.410619	0.569632	0.428534	-20.0685	cg16414852	NM_014465.2	GeneID:27284	4	70660717	70661019	302	FALSE
ZFR	-0.410909	0.569542	0.428381	-20.0854	cg13954292	NM_016107.3	GeneID:51663	5	32481280	32480601	679	TRUE	5:32481114-32481350
FLJ22746	-0.411052	0.789092	0.593457	-55.6398	cg26154999	NM_024785.2	GeneID:79843	2	224974590	224974955	365	TRUE	2:224974431-224974638
MPPED2	-0.411576	0.76894	0.57809	-50.2271	cg23577242	NM_001584.1	GeneID:744	11	30559591	30558616	975	FALSE
AYTL2	-0.411757	0.529298	0.397877	-17.0373	cg05365670	NM_024830.3	GeneID:79888	5	1577551	1577076	475	TRUE	5:1575966-1577980
K5B	-0.411968	0.734912	0.552358	-42.4239	cg11845202	NM_173352.1	GeneID:196374	12	51528659	51529045	386	FALSE
PARK2	-0.412146	0.547291	0.411292	-18.4441	cg24816866	NM_004562.1	GeneID:5071	6	163069664	163068793	871	FALSE
GPR61	-0.412708	0.608303	0.456964	-23.8344	cg00521434	NM_031936.3	GeneID:83873	1	109883488	109884032	544	FALSE
MATN2	-0.413038	0.492394	0.369807	-14.665	cg10039928	NM_002380.3	GeneID:4147	8	98950036	98950487	451	TRUE	8:98950024-98951192
MGMT	-0.413164	0.652573	0.490066	-29.0041	cg02381948	NT_008818.15	GeneID:4255	10	131245102			TRUE	10:131244704-131245359
TMSL3	-0.413491	0.465127	0.34922	-13.1779	cg11826486	NM_183049.2	GeneID:7117	4	91980718	91979292	1426	FALSE
CARD14	-0.413902	0.877142	0.658374	-92.4993	cg05187322	NM_024110.2	GeneID:79092	17	75766923	75766876	47	TRUE	17:75766640-75766949
CHRM5	-0.414114	0.738721	0.554395	-43.5961	cg22927134	NM_012125.2	GeneID:1133	15	32136544	32137718	1174	FALSE
CLCA2	-0.415381	0.636788	0.477477	-27.3089	cg13693652	NM_006536.4	GeneID:9635	1	86661217	86662413	1196	FALSE
	-0.415642	0.536988	0.402572	-17.9595	cg27348440		GeneID:6955	14	21160549	21159897	652	FALSE
GATA5	-0.41569	0.868383	0.650993	-88.4189	cg16542081	NT_011362.9	GeneID:140628	20	60475096			TRUE	20:60474622-60475245
ZNF206	-0.418036	0.708664	0.530395	-38.3695	cg26014197	NM_032805.1	GeneID:84891	16	3083154	3082862	292	TRUE	16:3083148-3083532
LGI4	-0.418039	0.862609	0.645612	-86.111	cg17920197	NM_139284.1	GeneID:163175	19	40319060	40317944	1116	FALSE
IL1R1	-0.418088	0.551715	0.412912	-19.2834	cg15233681	NM_000877.2	GeneID:3554	2	102137034	102136834	200	FALSE
LOC116123	-0.418109	0.685033	0.512682	-34.3919	cg24272559	NM_138784.1	GeneID:116123	1	164839340	164839777	437	FALSE
RGS9	-0.418851	0.711315	0.532078	-39.0264	cg15595739	NM_003835.1	GeneID:8787	17	60613913	60615284	1371	FALSE
MYL1	-0.418904	0.476252	0.356233	-14.1549	cg11059341	NM_079420.1	GeneID:4632	2	210887805	210888142	337	FALSE
SLC12A1	-0.419643	0.654379	0.48922	-30.1144	cg14930674	NM_000338.1	GeneID:6557	15	46287532	46287190	342	FALSE
A2ML1	-0.419849	0.716352	0.535476	-40.1596	cg27653134	NM_144670.2	GeneID:144568	12	8866576	8866484	92	FALSE
PLA2G4E	-0.420161	0.787469	0.588508	-57.2031	cg14792155	NM_198442.1	GeneID:123745	15	40076910	40077012	102	FALSE
SELE	-0.420745	0.472306	0.352831	-14.0488	cg09784259	NM_000450.1	GeneID:6401	1	167970046	167969803	243	FALSE
ZNF610	-0.420882	0.538087	0.401933	-18.4985	cg15062535	NM_173530.1	GeneID:162963	19	57539745	57540494	749	FALSE
CHST5	-0.420963	0.594707	0.444202	-23.3746	cg13496066	NM_024533.2	GeneID:23563	16	74138332	74136834	1498	FALSE
KRT6IRS	-0.421034	0.600061	0.448179	-23.8995	cg01853981	NM_033448.1	GeneID:112802	12	51232749	51233170	421	FALSE
SCGB2A2	-0.421399	0.468349	0.349716	-13.863	cg14741922	NM_002411.1	GeneID:4250	11	61793510	61794206	696	FALSE
CSAG2	-0.421607	0.493897	0.36874	-15.4034	cg03033367	NM_004909.1	GeneID:9598	X	151627636	151628403	767	FALSE
IL22	-0.42161	0.61159	0.456607	-25.1613	cg26333641	NM_020525.4	GeneID:50616	12	66933282	66933548	266	FALSE
PLUNC	-0.42197	0.453333	0.33837	-13.0804	cg01910481	NM_016583.2	GeneID:51297	20	31287729	31287463	266	FALSE
HSPA6	-0.422438	0.564392	0.421128	-20.7434	cg24192663	NM_002155.3	GeneID:3310	1	159759635	159760660	1025	TRUE	1:159759522-159759732
C10orf11	-0.422564	0.662387	0.494205	-31.589	cg17238009	NM_032024.2	GeneID:83938	10	77212588	77212525	63	TRUE	10:77212410-77212612
IGLL1	-0.422895	0.466299	0.347824	-13.8478	cg02415431	NM_020070.2	GeneID:3543	22	22253255	22252495	760	FALSE
C9orf64	-0.42325	0.475821	0.35484	-14.404	cg02654291	NM_032307.2	GeneID:84267	9	85761834	85761721	113	TRUE	9:85760731-85761974
ITGAL	-0.423601	0.608719	0.453837	-25.0806	cg14176836	NM_002209.1	GeneID:3683	16	30391719	30391572	147	FALSE
TSHB	-0.423744	0.584743	0.435918	-22.6994	cg09058542	NM_000549.2	GeneID:7252	1	115374386	115373938	448	FALSE
LOC63928	-0.423895	0.519472	0.387219	-17.3514	cg21745164	NM_022097.1	GeneID:63928	16	23672805	23673449	644	FALSE
CECR5	-0.423899	0.650991	0.485253	-30.1999	cg19837751	NM_017829.5	GeneID:27440	22	16025416	16026177	761	FALSE
GYPA	-0.423952	0.601356	0.448239	-24.3314	cg09841009	NM_002099.3	GeneID:2993	4	145281410	145281294	116	FALSE
FHL1	-0.424208	0.461909	0.344236	-13.7056	cg14506668	NM_001449.3	GeneID:2273	X	135056519	135057346	827	TRUE	X:135056426-135058476
LNX1	-0.424615	0.579813	0.431983	-22.3571	cg00629217	NM_032622.1	GeneID:84708	4	54120106	54119124	982	FALSE
GPR119	-0.424784	0.556413	0.4145	-20.2705	cg21087701	NM_178471.1	GeneID:139760	X	129347794	129347102	692	FALSE
GAGE4	-0.426158	0.461537	0.343495	-13.8012	cg13758677	NM_001474.1	GeneID:2576	X	49102197	49103593	1396	TRUE	X:49101965-49102205
C20orf152	-0.427079	0.509766	0.379146	-16.8915	cg16796951	NM_080834.1	GeneID:140894	20	34018487	34019943	1456	FALSE
ACSL4	-0.427491	0.543214	0.403909	-19.4385	cg06822229	NM_022977.1	GeneID:2182	X	108863512	108863277	235	TRUE	X:108862355-108863655
TAS2R60	-0.428026	0.73941	0.549588	-46.3078	cg15905634	NM_177437.1	GeneID:338398	7	142850175	142850668	493	FALSE
ITIH1	-0.428438	0.496419	0.368872	-16.105	cg06134964	NM_002215.1	GeneID:3697	3	52787073	52786648	425	FALSE
C8orf72	-0.428455	0.771055	0.572937	-54.316	cg26369642	NM_147189.1	GeneID:90362	8	59149887	59150669	782	FALSE
RHD	-0.429085	0.575412	0.427378	-22.387	cg06388544	NM_016124.3	GeneID:6007	1	25471465	25471568	103	FALSE
THBS2	-0.429093	0.537578	0.399274	-19.1405	cg21732383	NM_003247.2	GeneID:7058	6	169396617	169396062	555	FALSE
NEUROD6	-0.429936	0.58053	0.430924	-22.9199	cg11554507	NM_022728.2	GeneID:63974	7	31347097	31347063	34	FALSE
LOC196549	-0.430288	0.590656	0.438333	-23.9227	cg12491368	NM_145293.2	GeneID:196549	13	31421340	31422296	956	FALSE
C12orf40	-0.430593	0.680137	0.504632	-35.4742	cg00686022	NM_173599.1	GeneID:283461	12	38306345	38306252	93	TRUE	12:38306053-38306365
CYP11B1	-0.430627	0.640908	0.475515	-29.7548	cg09120035	NM_000497.3	GeneID:1584	8	143958147	143958238	91	FALSE
PPEF2	-0.43148	0.598811	0.444019	-24.899	cg14724265	NM_152933.1	GeneID:5470	4	77042685	77042705	20	FALSE
C14orf152	-0.432469	0.590341	0.437439	-24.1254	cg00592315	NM_138344.2	GeneID:90050	14	93454364	93455011	647	FALSE
NPC1L1	-0.432736	0.578999	0.428955	-23.0588	cg17754680	NM_013389.1	GeneID:29881	7	44548356	44547439	917	FALSE
GZMK	-0.433081	0.496673	0.367875	-16.5008	cg04705866	NM_002104.2	GeneID:3003	5	54356547	54355864	683	FALSE
TP73	-0.433166	0.52581	0.389433	-18.6088	cg16607065	NT_004321.17	GeneID:7161	1	3597082			TRUE	1:3596889-3597535
HRASLS2	-0.433888	0.528326	0.391101	-18.8719	cg00763889	NM_017878.1	GeneID:54979	11	63087120	63087431	311	FALSE
C1orf116	-0.435551	0.610055	0.451082	-26.5612	cg01119135	NM_023938.4	GeneID:79098	1	205272148	205272715	567	FALSE
CUZD1	-0.436089	0.700905	0.518064	-39.9417	cg03283421	NM_022034.3	GeneID:50624	10	124600974	124600299	675	FALSE
CD33	-0.437921	0.554485	0.40932	-21.3197	cg10129493	NM_001772.2	GeneID:945	19	56420398	56420175	223	FALSE
AKR1C4	-0.43897	0.461052	0.3401	-14.5926	cg09272256	NM_001818.2	GeneID:1109	10	5228881	5228798	83	FALSE
CXorf9	-0.439345	0.453906	0.334741	-14.222	cg04499381	NM_018990.2	GeneID:54440	X	128741352	128741641	289	FALSE
C3orf40	-0.439743	0.545021	0.401825	-20.6933	cg25552889	NM_144635.3	GeneID:131408	3	185540377	185540952	575	FALSE
C1orf71	-0.440429	0.460567	0.339399	-14.6524	cg14460735	NM_152609.1	GeneID:163882	1	244795350	244796429	1079	TRUE	1:244795247-244797041
APOL1	-0.440648	0.462311	0.340632	-14.7782	cg07713361	NM_003661.2	GeneID:8542	22	34979090	34979070	20	FALSE
ZNF19	-0.441022	0.55064	0.405608	-21.2733	cg07506795	NM_006961.2	GeneID:7567	16	70081061	70080742	319	TRUE	16:70080524-70081125
P2RX1	-0.441274	0.604141	0.444941	-26.5565	cg26697117	NM_002558.2	GeneID:5023	17	3767267	3766709	558	FALSE
APIN	-0.441817	0.432346	0.318296	-13.1796	cg04570669	NM_017855.2	GeneID:54959	4	71098063	71098886	823	FALSE
ACVRL1	-0.442663	0.456935	0.336201	-14.5926	cg23640701	NM_000020.1	GeneID:94	12	50587901	50587469	432	TRUE	12:50586932-50587962
ATP2B3	-0.442732	0.753252	0.554198	-52.5264	cg10290730	NM_021949.2	GeneID:492	X	152454381	152454774	393	FALSE
PRR5	-0.442968	0.703156	0.517256	-41.4312	cg23240895	NM_015366.3	GeneID:55615	22	43450548	43451352	804	FALSE
TPO	-0.446174	0.432162	0.317202	-13.4361	cg10370591	NM_000547.3	GeneID:7173	2	1396438	1396242	196	FALSE
MYBPH	-0.446324	0.663989	0.487308	-35.1985	cg18959422	NM_004997.2	GeneID:4608	1	201411987	201411565	422	FALSE
ATP1A3	-0.446414	0.456429	0.334957	-14.8142	cg07051960	NM_152296.3	GeneID:478	19	47191459	47190222	1237	TRUE	19:47191425-47191661
PLS1	-0.448808	0.48271	0.353656	-16.7084	cg24278076	NM_002670.1	GeneID:5357	3	143823621	143825034	1413	FALSE
FLJ25369	-0.449852	0.504762	0.369545	-18.3986	cg12811135	NM_152670.1	GeneID:200523	2	88605587	88605284	303	FALSE
OTUD6A	-0.449908	0.515387	0.377309	-19.179	cg22762309	NM_207320.1	GeneID:139562	X	69198828	69199066	238	TRUE	X:69198820-69200785
CCDC27	-0.45056	0.552737	0.40447	-22.387	cg10051054	NM_152492.1	GeneID:148870	1	3659032	3658822	210	FALSE
GLTSCR2	-0.453111	0.428532	0.313028	-13.6639	cg16791686	NM_015710.3	GeneID:29997	19	52940826	52940620	206	TRUE	19:52940242-52941584
CCR9	-0.453292	0.710392	0.518852	-44.5758	cg09033997	NM_031200.1	GeneID:10803	3	45902605	45903023	418	FALSE
C8ORFK32	-0.453556	0.539178	0.39373	-21.4271	cg06276653	NM_015912.2	GeneID:51059	8	139233817	139233829	12	FALSE
GYPE	-0.453979	0.614174	0.448363	-29.2438	cg16998872	NM_002102.2	GeneID:2996	4	145046282	145046166	116	FALSE
NALP12	-0.454456	0.601833	0.439209	-27.7963	cg25866075	NM_033297.1	GeneID:91662	19	59019592	59019404	188	FALSE
ZNF80	-0.454541	0.525756	0.383666	-20.4	cg03109316	NM_007136.1	GeneID:7634	3	115440593	115439214	1379	FALSE
ASB17	-0.45482	0.440798	0.321606	-14.4331	cg17041296	NM_080868.1	GeneID:127247	1	76170435	76170704	269	FALSE
PRSS2	-0.454949	0.460472	0.335931	-15.6674	cg04958389	NM_002770.2	GeneID:5645	7	142178834	142178778	56	FALSE
IL10RA	-0.45513	0.504389	0.367924	-18.7967	cg26661481	NM_001558.2	GeneID:3587	11	117361080	117362319	1239	TRUE	11:117361042-117361243
ZNF511	-0.455711	0.570878	0.416256	-24.5625	cg15856055	NM_145806.2	GeneID:118472	10	134971285	134972413	1128	TRUE	10:134971124-134971365
BTNL9	-0.456571	0.650704	0.474179	-34.5624	cg15516226	NM_152547.2	GeneID:153579	5	180400125	180399854	271	TRUE	5:180400061-180400301
MC2R	-0.456718	0.689488	0.50239	-41.1349	cg11564670	NM_000529.2	GeneID:4158	18	13905006	13905535	529	FALSE
ANKRD21	-0.456758	0.444495	0.323869	-14.7782	cg00344709	NM_174981.2	GeneID:317754	21	13904096	13904369	273	TRUE	21:13903420-13904196
PHYHIP	-0.456769	0.450767	0.328436	-15.1634	cg26104206	NM_014759.2	GeneID:9796	8	22145048	22145549	501	TRUE	8:22144747-22145085
GDF2	-0.457528	0.577068	0.42024	-25.4002	cg05441133	NM_016204.1	GeneID:2658	10	48036897	48036859	38	TRUE	10:48036704-48037082
XCL2	-0.457541	0.602884	0.439036	-28.2532	cg03584220	NM_003175.2	GeneID:6846	1	166780191	166779846	345	FALSE
YSK4	-0.458068	0.444037	0.323242	-14.8391	cg15527554	NM_001018046.1	GeneID:80122	2	135498556	135498718	162	FALSE
LY6D	-0.458355	0.501952	0.365329	-18.8817	cg05800321	NM_003695.2	GeneID:8581	8	143864801	143865010	209	TRUE	8:143864661-143864861
C14orf8	-0.459847	0.666003	0.484227	-37.4512	cg18389810	NM_173846.3	GeneID:122664	14	20568727	20568296	431	TRUE	14:20568722-20568923
KRT13	-0.460137	0.542818	0.394584	-22.387	cg10742225	NM_002274.2	GeneID:3860	17	36916506	36915391	1115	FALSE
ADAM18	-0.46031	0.454651	0.330454	-15.6674	cg23566335	NM_014237.1	GeneID:8749	8	39561504	39561299	205	FALSE
DEFA4	-0.460493	0.502685	0.36532	-19.0746	cg19304352	NM_001925.1	GeneID:1669	8	6783586	6783196	390	FALSE
SPP2	-0.460916	0.742877	0.539718	-53.37	cg21137417	NM_006944.2	GeneID:6694	2	234624195	234624085	110	FALSE
THRAP2	-0.461054	0.659812	0.479324	-36.602	cg12113819	NM_015335.2	GeneID:23389	12	115200537	115199526	1011	TRUE	12:115198514-115200626
LCP1	-0.461617	0.56628	0.411217	-24.7047	cg17771150	NM_002298.2	GeneID:3936	13	45654210	45654395	185	FALSE
FBXW12	-0.462096	0.52293	0.379611	-20.8273	cg07125166	NM_207102.1	GeneID:285231	3	48388617	48388713	96	FALSE
GPR1	-0.462104	0.727558	0.528154	-49.9267	cg19132372	NM_005279.2	GeneID:2825	2	206787397	206786390	1007	TRUE	2:206786825-206787423
CYP4F2	-0.46278	0.700107	0.507988	-44.0986	cg13656062	NM_001082.3	GeneID:8529	19	15869723	15869884	161	FALSE
GBP7	-0.463768	0.425881	0.308802	-14.1548	cg26247501	NM_207398.1	GeneID:388646	1	89415149	89414311	838	FALSE
SLC5A4	-0.46433	0.73088	0.529747	-51.1386	cg13507893	NM_014227.1	GeneID:6527	22	30980997	30981318	321	FALSE
SPINK5L2	-0.464335	0.448328	0.324951	-15.5313	cg26851800	NM_001001325.1	GeneID:408187	5	147529019	147529489	470	FALSE
HEYL	-0.464515	0.483402	0.350328	-17.977	cg06154570	NM_014571.2	GeneID:26508	1	39878351	39877905	446	TRUE	1:39877450-39878424
GRM5	-0.465689	0.406778	0.294558	-13.1989	cg17173856	NM_000842.1	GeneID:2915	11	88421785	88420838	947	FALSE
LTA	-0.466731	0.430601	0.311584	-14.59	cg10995925	NM_000595.2	GeneID:4049	6	31647580	31648072	492	FALSE
CTSE	-0.46717	0.661509	0.478524	-37.7917	cg04457794	NM_001910.2	GeneID:1510	1	204484277	204484082	195	FALSE
TNF	-0.467432	0.514019	0.371765	-20.5609	cg04425624	NM_000594.2	GeneID:7124	6	31651544	31651329	215	FALSE
C5orf20	-0.468355	0.656122	0.474237	-37.0613	cg13349425	NM_130848.1	GeneID:140947	5	134810974	134810937	37	FALSE
H2BFS	-0.47021	0.794659	0.573632	-71.1826	cg15536230	NM_017445.1	GeneID:54145	21	43809520	43809548	28	TRUE	21:43809403-43810034
LTA	-0.470452	0.808776	0.583725	-76.5179	cg17709873	NM_000595.2	GeneID:4049	6	31648435	31648072	363	FALSE
RIT2	-0.470783	0.494239	0.356629	-19.2544	cg22039287	NM_002930.1	GeneID:6014	18	38950073	38949655	418	FALSE
JMY	-0.470931	0.701988	0.506484	-45.8343	cg17758148	NM_152405.1	GeneID:133746	5	78609397	78609507	110	FALSE
IFNA4	-0.47103	0.588709	0.424724	-28.1394	cg23029519	NM_021068.1	GeneID:3441	9	21177344	21177670	326	FALSE
RIMBP2	-0.471461	0.572695	0.413047	-26.3961	cg09847584	NM_015347.3	GeneID:23504	12	129568339	129568363	24	FALSE
IL1RL1	-0.47353	0.674396	0.4857	-41.0035	cg11916609	NM_016232.4	GeneID:9173	2	102293920	102294394	474	FALSE
RAB9P1	-0.473806	0.645288	0.464648	-36.1297	cg15453943	NR_000039.1	GeneID:9366	5	104462726	104463074	348	FALSE
DEFB127	-0.47631	0.651249	0.468127	-37.4196	cg24116886	NM_139074.2	GeneID:140850	20	85877	86186	309	FALSE
WDR44	-0.476981	0.437126	0.314066	-15.6702	cg13674559	NM_019045.3	GeneID:54521	X	117363780	117364070	290	TRUE	X:117363449-117364996
GPR15	-0.477112	0.521409	0.374588	-21.9984	cg08375941	NM_005290.1	GeneID:2838	3	99733072	99733568	496	FALSE
C21orf42	-0.477578	0.655695	0.470908	-38.3256	cg25864727	NM_058184.1	GeneID:54072	21	25724946	25725884	938	FALSE
NYD-SP26	-0.47788	0.503746	0.361706	-20.6027	cg22182945	NM_033122.2	GeneID:85438	4	71235172	71235298	126	FALSE
NXT2	-0.477943	0.517354	0.37146	-21.7237	cg13257485	NM_018698.3	GeneID:55916	X	108665510	108665666	156	FALSE
PRSS2	-0.479256	0.454091	0.325741	-16.9596	cg13944141	NM_002770.2	GeneID:5645	7	142178732	142178778	46	FALSE
DEFB105A	-0.479515	0.465972	0.334204	-17.8586	cg14120879	NM_152250.1	GeneID:245908	8	7332048	7332653	605	FALSE
HSD17B3	-0.48176	0.690074	0.494165	-45.2176	cg14633704	NM_000197.1	GeneID:3293	9	98105171	98104255	916	FALSE
SLC38A5	-0.483091	0.615541	0.440384	-32.9898	cg03021892	NM_033518.1	GeneID:92745	X	48214222	48213509	713	TRUE	X:48214220-48214426
MS4A2	-0.483697	0.455053	0.325428	-17.3626	cg22197708	NM_000139.2	GeneID:2206	11	59612192	59612713	521	FALSE
FOLH1	-0.483901	0.699898	0.500456	-47.6069	cg06980460	NM_004476.1	GeneID:2346	11	49187124	49186798	326	TRUE	11:49187075-49187371
SERPINA7	-0.483986	0.521029	0.372536	-22.5854	cg24636657	NM_000354.3	GeneID:6906	X	105167542	105167722	180	FALSE
ATP4B	-0.484159	0.446839	0.319451	-16.8043	cg06811800	NM_000705.2	GeneID:496	13	113360106	113360502	396	TRUE	13:113359799-113360176
FLJ21749	-0.484173	0.608641	0.435121	-32.2067	cg01432087	NM_025124.1	GeneID:80194	11	66998738	66999161	423	FALSE
PDCD1	-0.484756	0.520351	0.371852	-22.5854	cg18096388	NM_005018.1	GeneID:5133	2	242449646	242449731	85	FALSE
TGM4	-0.484964	0.796794	0.569321	-75.5059	cg13571802	NM_003241.1	GeneID:7047	3	44891477	44891131	346	FALSE
SORBS2	-0.485619	0.593656	0.423983	-30.4286	cg26583078	NM_021069.3	GeneID:8470	4	187114772	187114516	256	FALSE
ABCC13	-0.488284	0.711454	0.507176	-50.9907	cg23322112	NM_138726.2	GeneID:150000	21	14567520	14567991	471	FALSE
NPL	-0.48878	0.546805	0.389668	-25.4599	cg18117393	NM_030769.1	GeneID:80896	1	181027885	181028017	132	FALSE
SCN7A	-0.48965	0.794112	0.565565	-75.6041	cg25995212	NM_002976.1	GeneID:6332	2	167051230	167051724	494	FALSE
SLAMF1	-0.489663	0.418497	0.29805	-15.3043	cg20535085	NM_003037.1	GeneID:6504	1	158883228	158883493	265	FALSE
OR2A4	-0.489849	0.445874	0.317507	-17.1581	cg11884699	NM_030908.1	GeneID:79541	6	132064978	132064234	744	FALSE
CABP5	-0.49114	0.385498	0.274267	-13.4615	cg18534730	NM_019855.3	GeneID:56344	19	53239260	53239116	144	FALSE
FUT8	-0.493121	0.447616	0.318025	-17.5188	cg10225525	NM_004480.3	GeneID:2530	14	64946618	64947593	975	FALSE
SNAPC5	-0.493183	0.595516	0.423088	-31.534	cg16330965	NM_006049.1	GeneID:10302	15	64577444	64577123	321	TRUE	15:64576884-64577467
STK38	-0.493428	0.546652	0.388306	-25.9114	cg02964385	NM_007271.2	GeneID:11329	6	36623654	36623225	429	FALSE
KCNQ1DN	-0.493709	0.476922	0.338708	-19.7131	cg05656180	NT_009237.17	GeneID:55539	11	2846834			TRUE	11:2846828-2848015
NPBWR2	-0.495067	0.49648	0.352266	-21.3894	cg21628553	NM_005286.2	GeneID:2832	20	62208641	62208628	13	FALSE
	-0.495379	0.492364	0.349271	-21.0742	cg07512517		GeneID:6965	7	38374631	38374181	450	FALSE
GYPB	-0.495399	0.62524	0.443524	-36.0313	cg27214365	NM_002100.3	GeneID:2994	4	145160062	145159946	116	FALSE
ACMSD	-0.495584	0.522801	0.370809	-23.7592	cg18766847	NM_138326.1	GeneID:130013	2	135312097	135312660	563	FALSE
CAV3	-0.496098	0.685058	0.485721	-46.5408	cg08365982	NM_001234.3	GeneID:859	3	8750601	8750496	105	TRUE	3:8750552-8750774
C1QA	-0.496897	0.743821	0.527093	-60.9403	cg25995460	NM_015991.1	GeneID:712	1	22836743	22836687	56	FALSE
UNC84A	-0.497377	0.585594	0.414831	-30.7725	cg22972055	NM_025154.2	GeneID:23353	7	838819	838664	155	TRUE	7:838536-838925
KRTAP19-3	-0.499387	0.604416	0.427568	-33.4603	cg06748315	NM_181609.2	GeneID:337970	21	30785960	30786146	186	FALSE
LRRC15	-0.499507	0.506494	0.358268	-22.6424	cg26838900	NM_130830.2	GeneID:131578	3	195571421	195571761	340	FALSE
CYP2F1	-0.501857	0.653057	0.461187	-41.4286	cg06210526	NM_000774.3	GeneID:1572	19	46311690	46312193	503	FALSE
LYG2	-0.5019	0.575743	0.406576	-30.0882	cg02347114	NM_175735.3	GeneID:254773	2	99238101	99238002	99	FALSE
ITIH1	-0.502547	0.743829	0.525039	-62.0196	cg10356463	NM_002215.1	GeneID:3697	3	52786416	52786648	232	FALSE
CCND1	-0.503096	0.589788	0.416149	-31.9917	cg07426960	NT_078088.3	GeneID:595	11	69178471			TRUE	11:69177944-69178494
FLJ44060	-0.503338	0.421846	0.297601	-16.4557	cg08489623	NM_207366.1	GeneID:346288	7	55869714	55869736	22	FALSE
ITGB2	-0.5037	0.405328	0.285876	-15.3517	cg24167037	NM_000211.1	GeneID:3689	21	45165204	45165232	28	FALSE
SOX15	-0.503937	0.56307	0.397066	-28.7668	cg13098960	NM_006942.1	GeneID:6665	17	7434875	7434212	663	FALSE
TINAG	-0.504066	0.482753	0.340397	-20.996	cg12397274	NM_014464.2	GeneID:27283	6	54280142	54281162	1020	FALSE
KCNK16	-0.504293	0.376043	0.265113	-13.6633	cg01669948	NM_032115.2	GeneID:83795	6	39398855	39398294	561	FALSE
TAB3	-0.504327	0.667954	0.4709	-44.4989	cg14186071	NM_152787.2	GeneID:257397	X	30903023	30903122	99	FALSE
ZIM2	-0.505699	0.381177	0.26847	-14.02	cg27519373	NT_011109.15	GeneID:23619	19	62042104			TRUE	19:62041489-62042391
C4orf7	-0.506068	0.5332	0.375447	-25.7745	cg10585462	NM_152997.2	GeneID:260436	4	71126455	71126404	51	FALSE
DNAJB8	-0.506239	0.463952	0.326648	-19.6684	cg16953612	NM_153330.2	GeneID:165721	3	129668380	129668781	401	FALSE
POMC	-0.506407	0.448958	0.316054	-18.5816	cg08030082	NM_000939.1	GeneID:5443	2	25245343	25244956	387	TRUE	2:25243726-25245503
DCAMKL1	-0.506816	0.690289	0.485807	-49.5045	cg17470143	NM_004734.2	GeneID:9201	13	35604433	35603443	990	FALSE
HIF3A	-0.507265	0.403494	0.28388	-15.4501	cg07022477	NM_022462.2	GeneID:64344	19	51490709	51492154	1445	FALSE
SIGLEC7	-0.507537	0.368423	0.259157	-13.4001	cg01193293	NM_014385.1	GeneID:27036	19	56336366	56337387	1021	FALSE
SARDH	-0.508071	0.692109	0.486664	-50.0734	cg21122774	NM_007101.2	GeneID:1757	9	135594817	135594863	46	FALSE
GML	-0.508103	0.618677	0.435021	-36.6524	cg07711097	NM_002066.1	GeneID:2765	8	143912956	143913219	263	FALSE
C3	-0.508248	0.694575	0.488339	-50.6868	cg04089739	NM_000064.1	GeneID:718	19	6670980	6671660	680	FALSE
ZNF157	-0.508307	0.54365	0.382212	-27.0902	cg13794642	NM_003446.2	GeneID:7712	X	47114733	47114926	193	FALSE
SLC26A3	-0.508579	0.439277	0.308774	-18.0052	cg22294577	NM_000111.1	GeneID:1811	7	107231964	107230873	1091	FALSE
XAGE5	-0.509022	0.478776	0.336435	-21.0619	cg25993152	NM_130775.1	GeneID:170627	X	52857461	52857953	492	TRUE	X:52857013-52857693
GRAP2	-0.509469	0.456899	0.320963	-19.357	cg25712380	NM_004810.2	GeneID:9402	22	38627772	38627032	740	FALSE
CYP4A11	-0.509819	0.633406	0.444848	-39.256	cg19714296	NM_000778.2	GeneID:1579	1	47179987	47180004	17	FALSE
LRRC8B	-0.509868	0.791858	0.556111	-79.7364	cg09099022	NM_015350.1	GeneID:23507	1	89797210	89796860	350	FALSE
CYP3A43	-0.510206	0.525497	0.368963	-25.3798	cg13364756	NM_022820.3	GeneID:64816	7	99263129	99263572	443	FALSE
SLC17A1	-0.510521	0.623819	0.437901	-37.7919	cg22101098	NM_005074.1	GeneID:6568	6	25938768	25938776	8	FALSE
UNC45B	-0.510662	0.441017	0.30955	-18.2932	cg25013053	NM_173167.2	GeneID:146862	17	30499144	30498949	195	FALSE
GPR81	-0.510838	0.520257	0.365124	-24.9096	cg22534509	NM_032554.2	GeneID:27198	12	121781072	121781082	10	TRUE	12:121781059-121781302
LTB4R	-0.512114	0.582995	0.408793	-32.1696	cg20542800	NM_181657.1	GeneID:1241	14	23852374	23852357	17	FALSE
PGK2	-0.512205	0.432609	0.303324	-17.7934	cg06403553	NM_138733.2	GeneID:5232	6	49862807	49862966	159	FALSE
LBP	-0.512439	0.398519	0.279376	-15.4501	cg08351331	NM_004139.2	GeneID:3929	20	36408497	36408299	198	FALSE
LRP5	-0.513619	0.641653	0.449454	-41.1863	cg21115990	NM_002335.1	GeneID:4041	11	67835657	67836711	1054	FALSE
TRIM42	-0.514307	0.388608	0.272076	-14.9298	cg13998904	NM_152616.3	GeneID:287015	3	141879493	141879571	78	FALSE
UPP2	-0.514318	0.597519	0.418337	-34.395	cg03520136	NM_173355.2	GeneID:151531	2	158559546	158559937	391	FALSE
GBP7	-0.514768	0.639731	0.447751	-41.02	cg25463135	NM_207398.1	GeneID:388646	1	89413759	89414311	552	FALSE
TINAG	-0.515139	0.376236	0.263262	-14.2495	cg27090087	NM_014464.2	GeneID:27283	6	54280337	54281162	825	FALSE
HKR3	-0.515337	0.632449	0.44248	-39.8956	cg14186992	NM_005341.1	GeneID:3104	1	6562157	6562698	541	TRUE	1:6561940-6563107
A4GNT	-0.515694	0.754373	0.527651	-67.9142	cg18931888	NM_016161.1	GeneID:51146	3	139334564	139333897	667	FALSE
TNFSF8	-0.516753	0.473758	0.33113	-21.2472	cg24443250	NM_001244.2	GeneID:944	9	116732831	116732591	240	TRUE	9:116732561-116732855
FLJ32130	-0.516905	0.447495	0.312741	-19.1956	cg12582366	NM_152458.4	GeneID:146540	16	30504041	30504511	470	TRUE	16:30503906-30504857
CER1	-0.516946	0.410331	0.28676	-16.5552	cg01446692	NM_005454.2	GeneID:9350	9	14713496	14712715	781	FALSE
S100A12	-0.517923	0.380414	0.265672	-14.6293	cg02813121	NM_005621.1	GeneID:6283	1	151615535	151614699	836	FALSE
DNTT	-0.51861	0.723068	0.504733	-59.5694	cg27157038	NM_004088.3	GeneID:1791	10	98053989	98054075	86	FALSE
TGM5	-0.518882	0.595244	0.415428	-34.6101	cg27496506	NM_201631.1	GeneID:9333	15	41346462	41346347	115	FALSE
FLJ36180	-0.519621	0.457587	0.319192	-20.1734	cg04086012	NM_178556.3	GeneID:339976	4	189297894	189297592	302	TRUE	4:189297883-189298217
C19orf19	-0.519636	0.51397	0.358519	-25.1055	cg12334759	NM_182577.1	GeneID:284451	19	426154	425983	171	FALSE
GIMAP7	-0.51985	0.463676	0.323388	-20.6865	cg01227741	NM_153236.3	GeneID:168537	7	149842112	149842878	766	TRUE	7:149841790-149842156
HPCAL1	-0.520857	0.420149	0.292826	-17.4851	cg11147193	NM_002149.2	GeneID:3241	2	10359491	10360491	1000	TRUE	2:10359482-10359683
LCN12	-0.520932	0.368865	0.25707	-14.1408	cg13493001	NM_178536.2	GeneID:286256	9	138965921	138966589	668	FALSE
PDZD3	-0.521509	0.77688	0.541208	-76.9913	cg09799714	NM_024791.2	GeneID:79849	11	118561920	118561405	515	FALSE
GIMAP7	-0.521511	0.403	0.280747	-16.3524	cg01827098	NM_153236.3	GeneID:168537	7	149842085	149842878	793	TRUE	7:149841790-149842156
DACH2	-0.521798	0.37462	0.260924	-14.507	cg15373633	NM_053281.2	GeneID:117154	X	85290130	85290281	151	TRUE	X:85289360-85290755
ARIH2	-0.52198	0.456379	0.317829	-20.2539	cg06641503	NM_006321.1	GeneID:10425	3	48934345	48935202	857	FALSE
HNF4A	-0.522502	0.547424	0.381097	-28.9428	cg23834593	NM_000457.3	GeneID:3172	20	42417334	42417855	521	FALSE
IL22RA2	-0.523093	0.604157	0.42042	-36.4242	cg26112901	NM_181309.1	GeneID:116379	6	137536681	137536478	203	FALSE
CPS1	-0.523174	0.635898	0.442483	-41.4928	cg21165909	NM_001875.2	GeneID:1373	2	211128183	211129583	1400	FALSE
RTP1	-0.523786	0.37515	0.260933	-14.64	cg08749917	NM_153708.1	GeneID:132112	3	188398014	188398002	12	FALSE
FCN1	-0.523878	0.457991	0.318533	-20.5519	cg06244417	NM_002003.2	GeneID:2219	9	136949449	136949630	181	FALSE
EFNB1	-0.524615	0.519893	0.361401	-26.1556	cg24139739	NT_011669.16	GeneID:1947	X	67965543			TRUE	X:67965268-67967122
LCE3C	-0.524732	0.393671	0.273636	-15.9043	cg03741352	NM_178434.1	GeneID:353144	1	150840074	150839832	242	FALSE
TRIM40	-0.526205	0.387715	0.269221	-15.5887	cg07405796	NM_138700.2	GeneID:135644	6	30212531	30212489	42	FALSE
RDHE2	-0.526438	0.499941	0.347093	-24.3473	cg18140857	NM_138969.2	GeneID:195814	8	57396428	57395795	633	TRUE	8:57396265-57396478
ITGB1BP2	-0.526477	0.366969	0.254767	-14.3122	cg12391921	NM_012278.1	GeneID:26548	X	70438375	70438353	22	FALSE
MGC29671	-0.52656	0.558887	0.387984	-30.7368	cg18750756	NM_182538.3	GeneID:201305	17	4283980	4283968	12	FALSE
CHI3L1	-0.526819	0.509497	0.353633	-25.3315	cg03625911	NM_001276.1	GeneID:1116	1	201422360	201422500	140	FALSE
AQP9	-0.527183	0.396065	0.274833	-16.223	cg11098259	NM_020980.2	GeneID:366	15	56217683	56217771	88	FALSE
CCL23	-0.52732	0.430725	0.298855	-18.6996	cg14916288	NM_005064.3	GeneID:6368	17	31369249	31369118	131	FALSE
INSL4	-0.527604	0.52883	0.366853	-27.3939	cg19297688	NM_002195.1	GeneID:3641	9	5221360	5221419	59	FALSE
TCEAL1	-0.528864	0.350629	0.243021	-13.4918	cg19928247	NM_004780.2	GeneID:9338	X	102770450	102770304	146	TRUE	X:102770299-102771723
FMO3	-0.529133	0.731961	0.507228	-63.9415	cg18063149	NM_001002294.1	GeneID:2328	1	169326695	169326660	35	FALSE
LHPP	-0.530854	0.485237	0.335855	-23.3999	cg07596401	NM_022126.2	GeneID:64077	10	126140076	126140402	326	TRUE	10:126139604-126141042
ABI3	-0.531616	0.54366	0.376092	-29.4684	cg21400896	NM_016428.2	GeneID:51225	17	44643568	44642588	980	FALSE
BPI	-0.532547	0.387375	0.267805	-15.9631	cg08254089	NM_001725.1	GeneID:671	20	36366603	36365999	604	FALSE
FRMPD2	-0.532662	0.42802	0.295881	-18.8817	cg06206628	NM_001017929.1	GeneID:143162	10	49152832	49152919	87	FALSE
EPB41L1	-0.532685	0.642405	0.444074	-44.027	cg14324838	NM_012156.2	GeneID:2036	20	34164089	34163762	327	FALSE
TMPRSS3	-0.532897	0.342207	0.236521	-13.2087	cg01214847	NM_024022.1	GeneID:64699	21	42689155	42689269	114	TRUE	21:42689075-42689432
ABCB11	-0.534164	0.456598	0.315307	-21.181	cg20118424	NM_003742.2	GeneID:8647	2	169595521	169596079	558	FALSE
ACOXL	-0.53437	0.591492	0.408402	-36.0313	cg01494593	NM_018308.1	GeneID:55289	2	111272720	111273085	365	FALSE
IL1F8	-0.534443	0.525433	0.362772	-27.6979	cg09995854	NM_014438.3	GeneID:27177	2	113526715	113526911	196	FALSE
CYP19A1	-0.534661	0.424228	0.292853	-18.7262	cg14694011	NM_000103.2	GeneID:1588	15	49418316	49418086	230	FALSE
LCE1B	-0.535135	0.377245	0.260335	-15.437	cg21434954	NM_178349.1	GeneID:353132	1	151049761	151051071	1310	FALSE
OR2S2	-0.535263	0.518553	0.357818	-27.0604	cg26922202	NM_019897.1	GeneID:56656	9	35947984	35948065	81	FALSE
ENPP3	-0.535422	0.470558	0.324665	-22.5081	cg08678755	NM_005021.2	GeneID:5169	6	131998704	132000168	1464	FALSE
ELK4	-0.536229	0.537502	0.370646	-29.2403	cg26245202	NM_001973.2	GeneID:2005	1	203869487	203868623	864	FALSE
ELAVL4	-0.536289	0.725324	0.500142	-63.5969	cg18242139	NM_021952.2	GeneID:1996	1	50347424	50347225	199	FALSE
LOC339789	-0.536564	0.501278	0.345587	-25.3945	cg09781594	NM_207358.1	GeneID:339789	2	8386839	8386000	839	FALSE
PIP	-0.537212	0.452995	0.312159	-21.1187	cg15542496	NM_002652.2	GeneID:5304	7	142538478	142539296	818	FALSE
ESX1	-0.539587	0.333536	0.229462	-13.0447	cg09261015	NM_153448.2	GeneID:80712	X	103386303	103386244	59	TRUE	X:103384772-103386953
CHRNA9	-0.539892	0.453195	0.311718	-21.3351	cg10375110	NM_017581.2	GeneID:55584	4	40032200	40032226	26	FALSE
UNQ3033	-0.540894	0.515756	0.354503	-27.2832	cg01718139	NM_198481.1	GeneID:284415	19	59258650	59259019	369	TRUE	19:59258478-59258690
SERPINA10	-0.540965	0.470174	0.323156	-22.8841	cg05788638	NM_016186.1	GeneID:51156	14	93828773	93829114	341	FALSE
S100A9	-0.541414	0.551615	0.379013	-31.4487	cg16139316	NM_002965.2	GeneID:6280	1	151597382	151596954	428	FALSE
FAM55A	-0.542451	0.466048	0.31999	-22.6417	cg27227156	NM_152315.1	GeneID:120400	11	113935495	113935790	295	FALSE
C11orf9	-0.542477	0.448271	0.307779	-21.1247	cg04237003	NM_013279.1	GeneID:745	11	61278578	61279437	859	FALSE
KCNQ1	-0.543134	0.601951	0.413106	-38.7009	cg12949760	NT_009237.17	GeneID:3784	11	2499438			TRUE	11:2498865-2499473
GLRA2	-0.54329	0.355521	0.24396	-14.5116	cg05206587	NM_002063.2	GeneID:2742	X	14457801	14457571	230	FALSE
CER1	-0.543375	0.422931	0.2902	-19.1977	cg07926025	NM_005454.2	GeneID:9350	9	14712864	14712715	149	FALSE
APCS	-0.543472	0.446521	0.306366	-21.0619	cg26353877	NM_001639.2	GeneID:325	1	157824510	157824240	270	FALSE
ROBO1	-0.544014	0.482021	0.330599	-24.1794	cg20145360	NM_002941.2	GeneID:6091	3	79722937	79721751	1186	FALSE
PLA2G5	-0.544925	0.66658	0.456892	-50.7199	cg19521927	NM_000929.1	GeneID:5322	1	20267954	20269425	1471	FALSE
DEFA6	-0.5453	0.400421	0.274388	-17.6813	cg27212977	NM_001926.2	GeneID:1671	8	6770817	6771008	191	FALSE
AGTR2	-0.545878	0.415945	0.284912	-18.8817	cg16191875	NM_000686.3	GeneID:186	X	115215546	115216031	485	FALSE
TSLP	-0.546956	0.413476	0.283009	-18.7597	cg15739437	NM_033035.3	GeneID:85480	5	110435437	110435289	148	FALSE
HTN1	-0.547057	0.498199	0.340975	-26.0084	cg06545504	NM_002159.2	GeneID:3346	4	70950381	70950748	367	FALSE
POGZ	-0.54747	0.555312	0.379955	-32.6135	cg12647320	NM_015100.2	GeneID:23126	1	149699846	149698556	1290	FALSE
KRTHA8	-0.548979	0.504757	0.345003	-26.8835	cg18848394	NM_006771.3	GeneID:8687	17	36851435	36851122	313	FALSE
DPP6	-0.550058	0.674427	0.460628	-53.2244	cg06434470	NM_001936.2	GeneID:1804	7	154060477	154060464	13	FALSE
CCL7	-0.550124	0.638373	0.435984	-45.8343	cg02936263	NM_006273.2	GeneID:6354	17	29620999	29621353	354	FALSE
USH3A	-0.550226	0.611518	0.417614	-41.1863	cg24365013	NM_052995.2	GeneID:7401	3	152174600	152173476	1124	FALSE
ALS2CR11	-0.550407	0.336191	0.22956	-13.7493	cg11052143	NM_152525.3	GeneID:151254	2	202192265	202192143	122	TRUE	2:202191787-202192348
ATP2B3	-0.551339	0.629187	0.429349	-44.3486	cg24443136	NM_021949.2	GeneID:492	X	152454781	152454774	7	FALSE
CHRNA1	-0.551841	0.68481	0.467143	-55.9254	cg05649009	NM_000079.1	GeneID:1134	2	175338096	175337416	680	FALSE
TGIF2LY	-0.551843	0.757802	0.516934	-77.1576	cg03515901	NM_139214.2	GeneID:90655	Y	3507157	3507126	31	TRUE	Y:3507149-3507995
C20orf114	-0.552266	0.453787	0.309459	-22.3708	cg22789545	NM_033197.2	GeneID:92747	20	31335013	31334602	411	FALSE
SLC15A4	-0.552302	0.379511	0.2588	-16.6376	cg19777783	NM_145648.1	GeneID:121260	12	127875329	127874494	835	TRUE	12:127872973-127875352
ASCL2	-0.554145	0.614833	0.418738	-42.2272	cg20392764	NM_005170.2	GeneID:430	11	2249693	2248758	935	TRUE	11:2246594-2249861
GUCY1A3	-0.55475	0.804838	0.547914	-97.4667	cg02210887	NM_000856.2	GeneID:2982	4	156806130	156807328	1198	FALSE
MMP9	-0.555205	0.384692	0.261806	-17.1754	cg20925811	NM_004994.2	GeneID:4318	20	44071924	44070954	970	TRUE	20:44071899-44072184
LOR	-0.558327	0.520342	0.353359	-29.4883	cg27626424	NM_000427.1	GeneID:4014	1	151498972	151498824	148	FALSE
EMR3	-0.558573	0.393963	0.26749	-18.0568	cg15552238	NM_032571.2	GeneID:84658	19	14646749	14646810	61	FALSE
FLJ32871	-0.558709	0.413057	0.280428	-19.4762	cg18609562	NM_144674.1	GeneID:146279	16	10697202	10696303	899	FALSE
KRTHB4	-0.558837	0.381983	0.259309	-17.1996	cg18153060	NM_033045.2	GeneID:3890	12	51066060	51065684	376	FALSE
MX2	-0.559036	0.468565	0.318041	-24.1754	cg21130374	NM_002463.1	GeneID:4600	21	41656136	41655820	316	TRUE	21:41656108-41656393
C1QB	-0.559114	0.443155	0.300778	-21.959	cg03941108	NM_000491.2	GeneID:713	1	22858524	22858474	50	FALSE
TEX13B	-0.559783	0.421796	0.286148	-20.2448	cg25071429	NM_031273.1	GeneID:56156	X	107111702	107112256	554	FALSE
CES7	-0.561775	0.482372	0.326791	-25.7606	cg23092086	NM_145024.1	GeneID:221223	16	54467074	54466783	291	FALSE
MAGEA5	-0.56202	0.403051	0.273008	-18.9695	cg14107638	NM_021049.3	GeneID:4104	X	151037036	151037100	64	FALSE
FCGR2B	-0.562844	0.718126	0.486147	-66.7769	cg22436411	NM_001002274.1	GeneID:2213	1	159898477	159899564	1087	FALSE
PDE4D	-0.563314	0.693747	0.46949	-60.3632	cg05992340	NM_006203.3	GeneID:5144	5	58918000	58918032	32	FALSE
AKR1C1	-0.564663	0.438584	0.296532	-21.9806	cg07639198	NM_001353.5	GeneID:1645	10	4994250	4995454	1204	FALSE
GPR132	-0.565411	0.436633	0.29506	-21.8782	cg26514492	NM_013345.2	GeneID:29933	14	104602938	104602799	139	FALSE
RNASE8	-0.566061	0.498408	0.336654	-27.7869	cg16627949	NM_138331.1	GeneID:122665	14	20596191	20595892	299	FALSE
PAEP	-0.566297	0.645629	0.436024	-49.7112	cg01055695	NM_001018049.1	GeneID:5047	9	137592771	137593425	654	FALSE
MSMB	-0.56687	0.522176	0.35251	-30.5503	cg21033494	NM_002443.2	GeneID:4477	10	51220120	51219559	561	FALSE
TRIM15	-0.568087	0.381833	0.257551	-17.7761	cg27091343	NM_033229.1	GeneID:89870	6	30238205	30238970	765	FALSE
HEPH	-0.568159	0.34022	0.229471	-14.8493	cg08021299	NM_014799.2	GeneID:9843	X	65299801	65299388	413	FALSE
ETNK2	-0.568779	0.36242	0.244339	-16.4427	cg03718539	NM_018208.1	GeneID:55224	1	202387212	202387645	433	TRUE	1:202386898-202388209
TOMM70A	-0.568801	0.417576	0.28152	-20.5566	cg20643416	NM_014820.3	GeneID:9868	3	101602790	101602915	125	TRUE	3:101602050-101603633
MUC15	-0.568936	0.801421	0.540249	-99.4082	cg03087937	NM_145650.2	GeneID:143662	11	26550132	26550356	224	FALSE
CYP4F12	-0.569099	0.57214	0.385644	-37.4071	cg25813714	NM_023944.1	GeneID:66002	19	15643945	15644918	973	FALSE
TBX22	-0.569208	0.358152	0.24139	-16.1491	cg17205788	NM_016954.2	GeneID:50945	X	79163723	79164398	675	FALSE
IL3	-0.569383	0.680771	0.458775	-58.1087	cg17983064	NM_000588.3	GeneID:3562	5	131424256	131424246	10	FALSE
MUC3B	-0.569608	0.638654	0.430325	-48.8255	cg00644033	XM_168578.6	GeneID:57876	7	100382640	100382565	75	FALSE
HLA-DPA1	-0.569933	0.30986	0.208737	-13.1019	cg13906813	NM_033554.2	GeneID:3113	6	33148892	33149356	464	FALSE
VIPR1	-0.570039	0.378921	0.255241	-17.6811	cg10970409	NM_004624.2	GeneID:7433	3	42518570	42519121	551	TRUE	3:42517784-42519758
COLEC10	-0.570157	0.415558	0.279897	-20.4784	cg27041096	NM_006438.2	GeneID:10584	8	120148354	120148627	273	FALSE
SEMA3B	-0.571612	0.379733	0.255509	-17.8514	cg22037648	NT_022517.17	GeneID:7869	3	50286013			TRUE	3:50285369-50286362
TCEB3C	-0.571631	0.511271	0.344012	-29.7571	cg02432101	NM_145653.2	GeneID:162699	18	42811633	42810447	1186	FALSE
HLA-DRB5	-0.571746	0.47475	0.319413	-25.8617	cg10746737	NM_002125.3	GeneID:3127	6	32606582	32605984	598	FALSE
RRP22	-0.572669	0.384858	0.258768	-18.2859	cg16612562	NM_006477.3	GeneID:10633	22	28042045	28041748	297	TRUE	22:28040690-28042230
C10orf27	-0.57286	0.855573	0.575187	-131.925	cg10548978	NM_152710.1	GeneID:219793	10	72215059	72215163	104	FALSE
PAGE5	-0.573228	0.400359	0.269085	-19.4599	cg13837202	NM_130467.3	GeneID:90737	X	55263702	55263516	186	TRUE	X:55263379-55263750
SUMF1	-0.573541	0.362674	0.243704	-16.7046	cg18847227	NM_182760.2	GeneID:285362	3	4484268	4483954	314	TRUE	3:4484212-4484483
F11	-0.574012	0.44384	0.298148	-23.133	cg23408620	NM_000128.2	GeneID:2160	4	187424489	187424272	217	FALSE
BSND	-0.574614	0.608331	0.408473	-43.867	cg14615807	NM_057176.2	GeneID:7809	1	55236761	55237205	444	FALSE
MARCH1	-0.575772	0.631993	0.424021	-48.4052	cg07259382	NM_017923.2	GeneID:55016	4	164755678	164754226	1452	FALSE
USH2A	-0.576059	0.572174	0.383811	-38.2647	cg15590780	NM_206933.1	GeneID:7399	1	214663262	214663361	99	FALSE
GPR174	-0.577354	0.447797	0.30011	-23.736	cg19388557	NM_032553.1	GeneID:84636	X	78313533	78313125	408	FALSE
CSF2	-0.57753	0.551597	0.369631	-35.4797	cg02196805	NM_000758.2	GeneID:1437	5	131437536	131437384	152	FALSE
PTGIS	-0.577618	0.459554	0.307933	-24.8582	cg07612655	NM_000961.3	GeneID:5740	20	47618924	47618114	810	FALSE
NPFFR2	-0.578087	0.376017	0.251876	-17.9636	cg03017946	NM_053036.1	GeneID:10886	4	73116145	73116385	240	FALSE
TSPAN18	-0.578902	0.798766	0.534753	-100.564	cg06791867	NM_130783.2	GeneID:90139	11	44837520	44837628	108	FALSE
KIAA0664	-0.579004	0.392909	0.263023	-19.2744	cg17119387	NM_015229.2	GeneID:23277	17	2562181	2562064	117	TRUE	17:2561030-2563522
NPL	-0.57932	0.495885	0.331885	-28.7214	cg00548060	NM_030769.1	GeneID:80896	1	181028528	181028017	511	FALSE
CYP1A2	-0.579979	0.518055	0.346565	-31.3619	cg09207718	NM_000761.3	GeneID:1544	15	72828439	72828237	202	FALSE
FUT1	-0.58	0.35776	0.239328	-16.7229	cg13881341	NM_000148.2	GeneID:2523	19	53951027	53950459	568	FALSE
C10orf82	-0.580002	0.399266	0.267094	-19.8243	cg07621046	NM_144661.2	GeneID:143379	10	118419648	118419471	177	TRUE	10:118419465-118419880
CD84	-0.58007	0.313079	0.209428	-13.7757	cg16776350	NM_003874.1	GeneID:8832	1	158815782	158815889	107	FALSE
EPDR1	-0.581082	0.30179	0.201735	-13.119	cg27641018	NM_017549.2	GeneID:54749	7	37926280	37926688	408	FALSE
ACCN5	-0.581112	0.620759	0.414946	-46.9914	cg14401592	NM_017419.1	GeneID:51802	4	157007250	157006875	375	FALSE
CLEC4C	-0.581474	0.341836	0.228442	-15.6906	cg01120761	NM_130441.2	GeneID:170482	12	7794437	7793336	1101	FALSE
S100A8	-0.581571	0.395192	0.264082	-19.6141	cg20070090	NM_002964.3	GeneID:6279	1	151630113	151630173	60	FALSE
TECTA	-0.58187	0.44461	0.297042	-23.7856	cg14252059	NM_005422.1	GeneID:7007	11	120478484	120478585	101	FALSE
K6HF	-0.581935	0.729372	0.487269	-74.1147	cg17255302	NM_004693.1	GeneID:9119	12	51114728	51114373	355	FALSE
PSKH2	-0.582294	0.648901	0.433401	-52.8488	cg19587887	NM_033126.1	GeneID:85481	8	87151181	87150967	214	TRUE	8:87150641-87151288
FCN2	-0.583209	0.517893	0.345682	-31.6782	cg26164184	NM_004108.2	GeneID:2220	9	136911327	136912479	1152	FALSE
ASZ1	-0.583808	0.743081	0.495784	-79.1444	cg09911342	NM_130768.1	GeneID:136991	7	116855155	116854779	376	TRUE	7:116854400-116855316
ALOX15B	-0.584294	0.311773	0.207945	-13.874	cg15799267	NM_001141.1	GeneID:247	17	7883131	7883127	4	FALSE
PNLIPRP2	-0.585165	0.378231	0.252119	-18.5744	cg16272420	NM_005396.3	GeneID:5408	10	118371034	118370808	226	FALSE
ZNF423	-0.585356	0.507427	0.338192	-30.6429	cg02238504	NM_015069.2	GeneID:23090	16	48418876	48418419	457	FALSE
APOA2	-0.585382	0.5148	0.343101	-31.5121	cg01053621	NM_001643.1	GeneID:336	1	159460615	159460042	573	FALSE
CT45-2	-0.585461	0.366013	0.243924	-17.6673	cg21457804	NM_152582.3	GeneID:158852	X	134763689	134764401	712	TRUE	X:134763422-134763814
C2orf21	-0.585947	0.480464	0.320091	-27.6726	cg22037121	NM_182587.1	GeneID:285175	2	210343863	210344962	1099	FALSE
UGT1A10	-0.586335	0.451986	0.301038	-24.8373	cg18098286	NM_019075.2	GeneID:54575	2	234209010	234209862	852	FALSE
SIRPB1	-0.586542	0.369439	0.246023	-17.9848	cg09577651	NM_006065.1	GeneID:10326	20	1548705	1548630	75	FALSE
SH3BGRL	-0.58811	0.336713	0.223986	-15.6952	cg12650780	NM_003022.1	GeneID:6451	X	80344705	80344278	427	FALSE
THPO	-0.588583	0.425392	0.282884	-22.5903	cg11819637	NM_000460.2	GeneID:7066	3	185578199	185578626	427	FALSE
CYP7B1	-0.58899	0.540263	0.359171	-35.2045	cg17347634	NM_004820.2	GeneID:9420	8	65874470	65873902	568	TRUE	8:65873327-65874473
FLG	-0.589109	0.318662	0.211832	-14.5228	cg26390526	NM_002016.1	GeneID:2312	1	150565702	150564303	1399	FALSE
MGC34824	-0.589121	0.350699	0.233127	-16.7389	cg11130441	NM_173652.1	GeneID:285154	2	38211651	38211751	100	FALSE
H1T2	-0.589598	0.587678	0.390529	-42.3718	cg00745543	NM_181788.1	GeneID:341567	12	47009021	47009030	9	FALSE
IFNA14	-0.590482	0.336003	0.223147	-15.7833	cg00474004	NM_002172.1	GeneID:3448	9	21229944	21229990	46	FALSE
IL1F10	-0.590501	0.374773	0.248891	-18.6305	cg05949173	NM_032556.4	GeneID:84639	2	113542353	113542018	335	FALSE
COL4A2	-0.591891	0.355516	0.235875	-17.2607	cg19385139	NM_001846.1	GeneID:1284	13	109756362	109757632	1270	FALSE
P2RY10	-0.592046	0.421461	0.279598	-22.5242	cg23079782	NM_014499.2	GeneID:27334	X	78087577	78087485	92	FALSE
PLA2G2F	-0.59258	0.49717	0.329701	-30.154	cg16087263	NM_022819.2	GeneID:64600	1	20337805	20338406	601	FALSE
SLC4A4	-0.59449	0.531113	0.351745	-34.5431	cg19850370	NM_003759.1	GeneID:8671	4	72423968	72423681	287	FALSE
SEMG2	-0.594814	0.55731	0.369012	-38.2809	cg03312792	NM_003008.2	GeneID:6407	20	43283173	43283424	251	FALSE
MGC35206	-0.596474	0.458186	0.30303	-26.2682	cg22088368	NM_178552.2	GeneID:339669	22	35734834	35733785	1049	FALSE
CLEC12A	-0.596578	0.379578	0.251023	-19.3446	cg11905488	NM_138337.3	GeneID:160364	12	10014871	10015281	410	FALSE
MAS1L	-0.597503	0.419214	0.277057	-22.6974	cg24063382	NM_052967.1	GeneID:116511	6	29565040	29563658	1382	FALSE
HYAL4	-0.59817	0.408954	0.270152	-21.8681	cg15560337	NM_012269.1	GeneID:23553	7	123272134	123272459	325	FALSE
TKTL2	-0.598874	0.546097	0.360571	-37.089	cg16413535	NM_032136.3	GeneID:84076	4	164614599	164614440	159	TRUE	4:164614019-164614653
TRIM49	-0.599586	0.480059	0.316811	-28.8311	cg22767466	NM_020358.2	GeneID:57093	11	89181514	89181391	123	FALSE
ZNF511	-0.599977	0.433283	0.285864	-24.1254	cg17770886	NM_145806.2	GeneID:118472	10	134971321	134972413	1092	TRUE	10:134971124-134971365
PLAC4	-0.60079	0.675874	0.445667	-62.3056	cg20423977	NM_182832.1	GeneID:191585	21	41479511	41479036	475	FALSE
CAPN3	-0.602124	0.371349	0.244639	-19.0634	cg23414431	NM_024344.1	GeneID:825	15	40427575	40427593	18	FALSE
POU2F2	-0.602851	0.396866	0.261317	-21.1437	cg21608489	NM_002698.1	GeneID:5452	19	47328977	47328420	557	TRUE	19:47328933-47329570
CDH12	-0.603552	0.525317	0.345728	-34.7257	cg15175266	NM_004061.2	GeneID:1010	5	22890461	22889488	973	FALSE
SLA	-0.603847	0.374062	0.246132	-19.3616	cg08996413	NM_006748.1	GeneID:6503	8	134141609	134141628	19	FALSE
POPDC2	-0.60506	0.615855	0.40489	-49.5888	cg19868730	NM_022135.2	GeneID:64091	3	120862702	120862094	608	FALSE
C10orf91	-0.605428	0.39395	0.258934	-21.0717	cg22045288	NM_173541.1	GeneID:170393	10	134108411	134108683	272	FALSE
AZGP1	-0.606025	0.629683	0.413704	-52.5358	cg12019109	NM_001185.2	GeneID:563	7	99412319	99411623	696	FALSE
GLIS1	-0.607041	0.398765	0.261806	-21.5886	cg21142398	NM_147193.1	GeneID:148979	1	53972666	53972465	201	FALSE
TREML2	-0.60789	0.662905	0.434969	-60.4931	cg19005210	NM_024807.1	GeneID:79865	6	41276938	41276902	36	FALSE
IFNA14	-0.608353	0.488783	0.320615	-30.6554	cg21023114	NM_002172.1	GeneID:3448	9	21231233	21229990	1243	FALSE
FAM38B	-0.608781	0.468941	0.307508	-28.4199	cg21165219	NM_022068.1	GeneID:63895	18	10688044	10687814	230	FALSE
RAG1	-0.609053	0.388796	0.254905	-20.8928	cg11494699	NM_000448.1	GeneID:5896	11	36544793	36546139	1346	FALSE
C17orf66	-0.609605	0.451251	0.295739	-26.6346	cg15532088	NM_152781.2	GeneID:256957	17	31219247	31220008	761	FALSE
TF	-0.611249	0.296967	0.194403	-14.1844	cg17775713	NM_001063.2	GeneID:7018	3	134948159	134947925	234	TRUE	3:134947530-134948249
HBII-438B	-0.611447	0.443014	0.28997	-25.9606	cg18499731	NR_001289.1	GeneID:338429	15	23073264	23074583	1319	FALSE
CHRNG	-0.611992	0.454973	0.297685	-27.2378	cg01145396	NM_005199.4	GeneID:1146	2	233111307	233112681	1374	FALSE
SGCG	-0.613233	0.523603	0.342295	-35.5751	cg07126559	NM_000231.1	GeneID:6445	13	22652937	22653091	154	FALSE
C7orf33	-0.613373	0.463031	0.302668	-28.1856	cg25043279	NM_145304.2	GeneID:202865	7	147918075	147918590	515	FALSE
GREB1	-0.613744	0.599595	0.391834	-47.6608	cg10612997	NM_014668.2	GeneID:9687	2	11591379	11591693	314	FALSE
PGR	-0.613888	0.372902	0.243667	-19.8942	cg01987509	NM_000926.2	GeneID:5241	11	100507255	100506465	790	FALSE
TTLL2	-0.614185	0.370636	0.242136	-19.7352	cg21970438	NM_031949.3	GeneID:83887	6	167658267	167658576	309	FALSE
CABP4	-0.614256	0.351065	0.229339	-18.2328	cg21518947	NM_145200.2	GeneID:57010	11	66979224	66979394	170	FALSE
HABP2	-0.614378	0.364788	0.238284	-19.2828	cg26656452	NM_004132.2	GeneID:3026	10	115303155	115302775	380	FALSE
REG1A	-0.614658	0.494951	0.323245	-32.0031	cg23111544	NM_002909.3	GeneID:5967	2	79200982	79201092	110	FALSE
SLC4A5	-0.614774	0.671761	0.438682	-63.771	cg14932645	NM_021196.2	GeneID:57835	2	74422512	74423170	658	FALSE
FNDC5	-0.614869	0.700771	0.457596	-71.8802	cg20951444	NM_153756.1	GeneID:252995	1	33109699	33108934	765	FALSE
PLCL1	-0.615328	0.603623	0.394034	-48.6636	cg02833180	NM_006226.1	GeneID:5334	2	198523309	198523731	422	FALSE
FLJ25801	-0.616799	0.645533	0.420963	-57.6812	cg25569462	NM_173553.1	GeneID:205860	4	189263854	189263402	452	FALSE
PAK6	-0.616856	0.606738	0.395648	-49.5045	cg06958211	NM_020168.3	GeneID:56924	15	38319472	38319368	104	FALSE
TTR	-0.616915	0.340115	0.221776	-17.5458	cg08521225	NM_000371.1	GeneID:7276	18	27425975	27425838	137	FALSE
AVPR2	-0.617184	0.409323	0.266855	-23.2252	cg19351638	NM_000054.2	GeneID:554	X	152823584	152823564	20	FALSE
DEFB118	-0.617193	0.277849	0.181141	-13.1974	cg20312687	NM_054112.1	GeneID:117285	20	29420246	29420089	157	FALSE
SLC44A5	-0.61735	0.365912	0.238526	-19.5498	cg27336379	NM_152697.2	GeneID:204962	1	75850818	75849359	1459	FALSE
C10orf89	-0.617611	0.636658	0.414941	-55.7661	cg09419900	NM_153336.1	GeneID:118672	10	124729456	124729546	90	FALSE
AANAT	-0.617745	0.403087	0.262687	-22.6994	cg09382492	NM_001088.1	GeneID:15	17	71975276	71975246	30	FALSE
C14orf152	-0.61848	0.579354	0.377366	-44.6857	cg20022541	NM_138344.2	GeneID:90050	14	93455148	93455011	137	FALSE
TTN	-0.618656	0.41028	0.267206	-23.4056	cg15133917	NM_003319.2	GeneID:7273	2	179380882	179380394	488	FALSE
CLEC4M	-0.619024	0.390483	0.254248	-21.6906	cg01532771	NM_014257.3	GeneID:10332	19	7733560	7734081	521	FALSE
REGL	-0.619852	0.300888	0.195799	-14.8156	cg02868123	XR_000606.1	GeneID:5969	2	79236421	79236690	269	FALSE
ASPA	-0.62395	0.314408	0.204016	-15.9996	cg02228185	NM_000049.2	GeneID:443	17	3326317	3326046	271	FALSE
WT1	-0.623961	0.363697	0.235998	-19.7722	cg13641903	NT_009237.17	GeneID:7490	11	32409184			TRUE	11:32408563-32409903
SNRPN	-0.624182	0.305949	0.198496	-15.3908	cg11265941	NM_022805.2	GeneID:6638	15	22619831	22619887	56	FALSE
GZMB	-0.626269	0.583207	0.377831	-46.3697	cg08766149	NM_004131.3	GeneID:3002	14	24173141	24173272	131	FALSE
SMCP	-0.626863	0.44788	0.29004	-27.7245	cg21948655	NM_030663.2	GeneID:4184	1	151116362	151117422	1060	FALSE
GATA4	-0.626897	0.579536	0.375289	-45.7988	cg24646414	NT_077531.3	GeneID:2626	8	11603134			TRUE	8:11602473-11604934
FCGR1A	-0.627798	0.51845	0.335522	-36.3782	cg19464944	NM_000566.2	GeneID:2209	1	148020624	148020912	288	FALSE
APOC3	-0.627885	0.429596	0.278002	-25.9215	cg04048249	NM_000040.1	GeneID:345	11	116205766	116205834	68	FALSE
CLEC4D	-0.628002	0.289161	0.187108	-14.3954	cg14162076	NM_080387.4	GeneID:338339	12	8556359	8557403	1044	TRUE	12:8556211-8556415
SCAP1	-0.628357	0.547597	0.354247	-40.7773	cg05106502	NM_003726.2	GeneID:8631	17	43861946	43862551	605	FALSE
TREML2	-0.629167	0.472636	0.305583	-30.6845	cg26928682	NM_024807.1	GeneID:79865	6	41276779	41276902	123	FALSE
SERPINA3	-0.630108	0.750517	0.48493	-92.7392	cg16507522	NM_001085.4	GeneID:12	14	94147310	94148467	1157	FALSE
SCTR	-0.63035	0.492375	0.318084	-33.1811	cg01897036	NM_002980.1	GeneID:6344	2	119998797	119998378	419	TRUE	2:119997791-119998904
CRYGA	-0.631878	0.271656	0.175309	-13.4162	cg22386774	NM_014617.2	GeneID:1418	2	208737935	208736633	1302	FALSE
SLC25A14	-0.63257	0.340813	0.219833	-18.4935	cg04493740	NM_022810.1	GeneID:9016	X	129301880	129301728	152	TRUE	X:129300885-129301883
NAP1L2	-0.633521	0.393154	0.253427	-22.8971	cg04297329	NM_021963.2	GeneID:4674	X	72351445	72351409	36	TRUE	X:72350731-72351488
HSPC117	-0.635592	0.290148	0.186761	-14.8051	cg26431343	NM_014306.2	GeneID:51493	22	31138764	31138235	529	FALSE
FLJ39575	-0.63567	0.312395	0.201071	-16.4822	cg11161873	NM_182597.1	GeneID:286006	7	111908179	111908282	103	FALSE
KRTAP5-9	-0.635743	0.43425	0.279488	-27.0352	cg10889792	NM_005553.2	GeneID:3846	11	70936565	70937114	549	FALSE
RPGR	-0.635845	0.279457	0.179848	-14.1035	cg07824317	NM_000328.2	GeneID:6103	X	38071950	38071732	218	TRUE	X:38070900-38072122
RBAK	-0.636207	0.266517	0.171478	-13.2381	cg06914598	NM_021163.2	GeneID:57786	7	5051647	5052079	432	TRUE	7:5051158-5051684
TNFRSF10C	-0.636908	0.426229	0.274103	-26.2817	cg16175263	NM_003841.2	GeneID:8794	8	23016330	23016379	49	TRUE	8:23016236-23017035
ADAM29	-0.637108	0.388644	0.249898	-22.7322	cg16411152	NM_014269.3	GeneID:11086	4	176076179	176076134	45	FALSE
PACAP	-0.637246	0.816573	0.525007	-127.723	cg19569684	NM_016459.2	GeneID:51237	5	138754318	138753501	817	FALSE
CDH26	-0.638148	0.442118	0.284077	-28.0226	cg24607535	NM_177980.1	GeneID:60437	20	57966890	57966877	13	FALSE
ACPL2	-0.638191	0.55094	0.353989	-42.4029	cg00400028	NM_152282.2	GeneID:92370	3	142432606	142433393	787	TRUE	3:142432491-142434965
EDG7	-0.639686	0.471497	0.302631	-31.5034	cg06501070	NM_012152.1	GeneID:23566	1	85104487	85104430	57	FALSE
BBOX1	-0.639929	0.483478	0.310269	-32.9959	cg20910746	NM_003986.1	GeneID:8424	11	27018992	27019574	582	FALSE
IL2RG	-0.639941	0.420362	0.269763	-25.9215	cg15201909	NM_000206.1	GeneID:3561	X	70248686	70248128	558	FALSE
ABRA	-0.641253	0.657696	0.421685	-64.6553	cg07005767	NM_139166.2	GeneID:137735	8	107851714	107851649	65	FALSE
SPINK7	-0.641712	0.330179	0.211629	-18.1529	cg27488807	NM_032566.2	GeneID:84651	5	147672091	147672183	92	FALSE
PAX1	-0.643175	0.267573	0.171328	-13.6127	cg24401441	NM_006192.1	GeneID:5075	20	21627843	21627714	129	FALSE
WFDC12	-0.643838	0.469963	0.30078	-31.7045	cg18241647	NM_080869.1	GeneID:128488	20	43186761	43186520	241	FALSE
SIRPD	-0.644632	0.463902	0.296738	-31.0412	cg17423978	NM_178460.1	GeneID:128646	20	1487641	1486343	1298	FALSE
C6orf105	-0.644779	0.457475	0.292597	-30.3309	cg14178895	NM_032744.1	GeneID:84830	6	11886888	11887052	164	FALSE
C1orf127	-0.64481	0.303545	0.19414	-16.2575	cg05352668	NM_173507.1	GeneID:148345	1	10946343	10946845	502	FALSE
C15orf32	-0.64716	0.434133	0.277209	-27.9023	cg17978274	NM_153040.1	GeneID:145858	15	90814680	90815911	1231	FALSE
CALB2	-0.647384	0.431192	0.275289	-27.6247	cg16893574	NM_001740.2	GeneID:794	16	69949596	69950127	531	FALSE
OR3A1	-0.649434	0.438489	0.27955	-28.5365	cg26232558	NM_002550.1	GeneID:4994	17	3142558	3142626	68	FALSE
PIK3R5	-0.649963	0.542892	0.345983	-42.4901	cg13453139	NM_014308.1	GeneID:23533	17	8755987	8756559	572	FALSE
CCL16	-0.650154	0.327753	0.208848	-18.4372	cg10190509	NM_004590.2	GeneID:6360	17	31332250	31332636	386	FALSE
RCV1	-0.650309	0.330463	0.210552	-18.6548	cg24357161	NM_002903.2	GeneID:5957	17	9750839	9749409	1430	TRUE	17:9750704-9750982
KRT16	-0.651677	0.273865	0.174326	-14.377	cg24457403	NM_005557.2	GeneID:3868	17	37023863	37022545	1318	FALSE
NALP9	-0.651723	0.474291	0.301896	-32.9817	cg08475088	NM_176820.2	GeneID:338321	19	60941103	60941580	477	FALSE
GATM	-0.652767	0.435815	0.277204	-28.5258	cg22340747	NM_001482.1	GeneID:2628	15	43470502	43471127	625	FALSE
TCL1B	-0.653181	0.410126	0.26079	-25.9044	cg27504299	NM_004918.2	GeneID:9623	14	95221862	95222516	654	FALSE
FABP7	-0.653895	0.535228	0.34017	-41.728	cg05798712	NM_001446.3	GeneID:2173	6	123142606	123142345	261	FALSE
SLURP1	-0.655348	0.301274	0.191286	-16.6088	cg07441143	NM_020427.2	GeneID:57152	8	143821003	143820831	172	FALSE
REG1A	-0.656918	0.310701	0.197056	-17.4289	cg05828624	NM_002909.3	GeneID:5967	2	79201207	79201092	115	FALSE
CSRP3	-0.657018	0.627982	0.398258	-60.2043	cg14704941	NM_003476.2	GeneID:8048	11	19181235	19180177	1058	FALSE
KRT1B	-0.657341	0.367899	0.233265	-22.227	cg18982568	NM_175078.1	GeneID:374454	12	51383436	51383514	78	FALSE
ARPP-21	-0.658093	0.551319	0.349379	-44.8545	cg12417466	NM_198399.1	GeneID:10777	3	35658823	35658853	30	FALSE
RTP1	-0.659248	0.320845	0.203161	-18.3745	cg11504646	NM_153708.1	GeneID:132112	3	188396644	188398002	1358	FALSE
RDH5	-0.659554	0.52716	0.333732	-41.1863	cg17243643	NM_002905.2	GeneID:5959	12	54400536	54400488	48	FALSE
FCRL4	-0.660161	0.490648	0.310486	-35.9637	cg17281600	NM_031282.1	GeneID:83417	1	155835215	155834494	721	FALSE
HIST1H2AA	-0.660704	0.371454	0.234971	-22.7333	cg02854090	NM_170745.3	GeneID:221613	6	25834874	25834769	105	TRUE	6:25834320-25834896
CCR3	-0.66116	0.263457	0.166602	-14.0595	cg04111761	NM_001837.2	GeneID:1232	3	46257770	46258692	922	FALSE
KCNK10	-0.661576	0.359169	0.227062	-21.6934	cg10935723	NM_021161.3	GeneID:54207	14	87863387	87863004	383	FALSE
MAGEB6	-0.661589	0.408138	0.258017	-26.3148	cg16122592	NM_173523.2	GeneID:158809	X	26120633	26120478	155	FALSE
KIR3DL3	-0.663543	0.394671	0.249166	-25.1049	cg11237817	NM_153443.2	GeneID:115653	19	59927574	59927796	222	FALSE
GZMH	-0.663619	0.271525	0.171412	-14.7173	cg02150910	NM_033423.2	GeneID:2999	14	24149197	24148704	493	FALSE
C6orf81	-0.664933	0.587895	0.370796	-52.5358	cg25994725	NM_145028.3	GeneID:221481	6	35811413	35812837	1424	FALSE
COL5A3	-0.665241	0.251107	0.158344	-13.3542	cg17177699	NM_015719.2	GeneID:50509	19	9981594	9982147	553	TRUE	19:9981430-9982341
PGK2	-0.666966	0.265437	0.16718	-14.4235	cg09299388	NM_138733.2	GeneID:5232	6	49863149	49862966	183	FALSE
TMEM35	-0.667113	0.293196	0.184645	-16.5707	cg16510657	NM_021637.1	GeneID:59353	X	100220606	100220519	87	FALSE
OAZ2	-0.668076	0.247897	0.156013	-13.229	cg07031532	NM_002537.1	GeneID:4947	15	62782737	62782507	230	TRUE	15:62782109-62782898
GHSR	-0.672054	0.290458	0.182295	-16.5889	cg22459146	NM_198407.1	GeneID:2693	3	173649724	173648897	827	TRUE	3:173647899-173649789
MUC13	-0.672711	0.552709	0.346729	-46.8738	cg09081544	NM_033049.2	GeneID:56667	3	126135480	126136270	790	FALSE
AQP4	-0.673172	0.499382	0.313176	-38.4701	cg22295573	NM_001650.4	GeneID:361	18	22700946	22699714	1232	FALSE
FLJ90805	-0.674688	0.274127	0.171732	-15.4139	cg02456292	NM_173633.1	GeneID:284339	19	47509102	47509328	226	TRUE	19:47509064-47510021
MBL2	-0.675006	0.556097	0.3483	-47.7672	cg27418851	NM_000242.1	GeneID:4153	10	54201659	54201466	193	FALSE
PDHA2	-0.675805	0.547103	0.342477	-46.2996	cg17725968	NM_005390.3	GeneID:5161	4	96980049	96980266	217	FALSE
C1orf111	-0.676075	0.35231	0.220499	-21.9806	cg16359129	NM_182581.1	GeneID:284680	1	160614376	160613275	1101	FALSE
CRISP2	-0.677315	0.381602	0.238627	-24.7816	cg04595372	NM_003296.1	GeneID:7180	6	49789192	49789233	41	TRUE	6:49789004-49789531
FKHL18	-0.677634	0.258346	0.161515	-14.3563	cg19145398	NM_004118.3	GeneID:2307	20	29897334	29897081	253	FALSE
USP29	-0.67858	0.27544	0.17209	-15.6952	cg16547341	NM_020903.2	GeneID:57663	19	62322503	62323321	818	TRUE	19:62321956-62323350
COL16A1	-0.67946	0.263533	0.16455	-14.8074	cg02989257	NM_001856.2	GeneID:1307	1	31941861	31942236	375	FALSE
SLC5A12	-0.68062	0.588959	0.36745	-54.9023	cg05953243	NM_178498.2	GeneID:159963	11	26700001	26700122	121	FALSE
BAI1	-0.68116	0.645989	0.40288	-68.516	cg20994561	NM_001702.1	GeneID:575	8	143541402	143542379	977	FALSE
FAM84A	-0.681318	0.268699	0.167559	-15.2895	cg14789259	NM_145175.1	GeneID:151354	2	14690908	14690307	601	TRUE	2:14690720-14690993
HNRPF	-0.681593	0.327116	0.203949	-20.0842	cg15321211	NM_004966.2	GeneID:3185	10	43225521	43224620	901	TRUE	10:43222491-43225621
PEPP-2	-0.682175	0.376734	0.23479	-24.6132	cg15465321	NM_032498.1	GeneID:84528	X	119176625	119176495	130	FALSE
HIST2H2AA	-0.682702	0.254374	0.158474	-14.2693	cg13536448	NM_003516.2	GeneID:8337	1	148081077	148080942	135	TRUE	1:148077971-148081828
GAL3ST4	-0.682706	0.256183	0.159601	-14.3954	cg17518962	NM_024637.3	GeneID:79690	7	99604488	99604152	336	FALSE
TCEB3C	-0.683084	0.345695	0.21531	-21.8159	cg16907024	NM_145653.2	GeneID:162699	18	42811405	42810447	958	FALSE
SPRR2E	-0.684073	0.381058	0.237173	-25.18	cg00152644	NM_001024209.1	GeneID:6704	1	151334860	151333625	1235	FALSE
GPC4	-0.684191	0.311879	0.194099	-18.9597	cg14600040	NM_001448.2	GeneID:2239	X	132377430	132376871	559	TRUE	X:132375857-132378130
INSL6	-0.684502	0.735584	0.457696	-99.4353	cg07531356	NM_007179.2	GeneID:11172	9	5175951	5175618	333	TRUE	9:5175191-5175954
AP1G2	-0.685312	0.317419	0.197394	-19.4505	cg02945646	NM_003917.2	GeneID:8906	14	23107009	23107119	110	FALSE
TAF1	-0.685512	0.33492	0.208248	-20.989	cg23986186	NM_004606.2	GeneID:6872	X	70502270	70502839	569	TRUE	X:70502161-70503917
IVL	-0.6858	0.525048	0.326402	-43.7517	cg05440289	NM_005547.2	GeneID:3713	1	151147743	151147663	80	FALSE
TLR8	-0.68729	0.368347	0.22875	-24.1479	cg00741717	NM_016610.2	GeneID:51311	X	12834105	12834679	574	FALSE
SLC22A2	-0.6874	0.323802	0.201072	-20.1192	cg06236276	NM_003058.2	GeneID:6582	6	160600068	160599949	119	TRUE	6:160600019-160600273
FXYD2	-0.688362	0.451103	0.279936	-33.3867	cg25894551	NM_021603.2	GeneID:486	11	117205061	117204017	1044	FALSE
EVI2A	-0.690269	0.249454	0.154596	-14.2184	cg23352695	NM_014210.2	GeneID:2123	17	26672937	26672843	94	FALSE
TGIF2LX	-0.690393	0.740917	0.459135	-102.871	cg01215061	NM_138960.3	GeneID:90316	X	89063596	89063596	0	TRUE	X:89063584-89064219
LCN1	-0.691731	0.265085	0.164117	-15.4563	cg23815000	NM_002297.2	GeneID:3933	9	137552833	137553107	274	FALSE
PDILT	-0.692551	0.469251	0.290353	-36.1802	cg04491443	NM_174924.1	GeneID:204474	16	20323467	20323534	67	FALSE
PTPRD	-0.693345	0.366317	0.226537	-24.3397	cg09440243	NM_130391.1	GeneID:5789	9	9009757	9008735	1022	FALSE
TP73	-0.69471	0.638276	0.394348	-68.6627	cg03846767	NT_004321.17	GeneID:7161	1	3597152			TRUE	1:3596889-3597535
NXF3	-0.695598	0.286776	0.17707	-17.432	cg12584889	NM_022052.1	GeneID:56000	X	102234581	102234678	97	FALSE
DIRAS3	-0.695763	0.426858	0.263535	-31.0465	cg03641225	NT_032977.8	GeneID:9077	1	68285127			TRUE	1:68285082-68285689
TMEM58	-0.695844	0.331716	0.204784	-21.2811	cg26203861	NM_198149.1	GeneID:149345	1	200125284	200124655	629	TRUE	1:200125087-200125301
ZNF677	-0.696395	0.230222	0.142073	-13.0111	cg16708981	NM_182609.1	GeneID:342926	19	58450421	58449923	498	TRUE	19:58449450-58450521
ELA3B	-0.697873	0.240617	0.148336	-13.8468	cg27069753	NM_007352.2	GeneID:23436	1	22176158	22176005	153	FALSE
PRDM11	-0.697885	0.683711	0.421491	-83.0057	cg09699159	NM_020229.2	GeneID:56981	11	45072104	45072140	36	FALSE
HTR3E	-0.699599	0.259338	0.159686	-15.3517	cg18236734	NM_182589.2	GeneID:285242	3	185300625	185300661	36	FALSE
SORBS2	-0.70077	0.573166	0.352637	-54.4733	cg20544605	NM_021069.3	GeneID:8470	4	187114491	187114516	25	TRUE	4:187114454-187114657
KLK3	-0.701913	0.420306	0.258386	-30.7801	cg17687962	NM_001648.2	GeneID:354	19	56050056	56049983	73	FALSE
TGM3	-0.702941	0.26236	0.161173	-15.7474	cg21611708	NM_003245.2	GeneID:7053	20	2225040	2224675	365	FALSE
TRO	-0.70526	0.227611	0.139601	-13.1401	cg06942445	NM_177555.1	GeneID:7216	X	54964098	54963974	124	TRUE	X:54964000-54965325
FLJ30596	-0.70591	0.241255	0.147903	-14.2118	cg16268429	NM_153013.2	GeneID:133686	5	36277893	36278001	108	TRUE	5:36276689-36278552
INSR	-0.706394	0.341207	0.209109	-22.7866	cg10670077	NM_000208.1	GeneID:3643	19	7244341	7245011	670	TRUE	19:7244275-7246271
ART3	-0.707745	0.500601	0.306507	-42.3034	cg22252999	NM_001179.2	GeneID:419	4	77215438	77214887	551	FALSE
CD300LF	-0.709379	0.522068	0.319288	-45.9704	cg21640749	NM_139018.2	GeneID:146722	17	70221326	70220703	623	FALSE
TRIM63	-0.709483	0.490052	0.299686	-40.9008	cg16051685	NM_032588.2	GeneID:84676	1	26266670	26266708	38	FALSE
SETBP1	-0.709625	0.864623	0.528699	-192.959	cg00037763	NM_015559.1	GeneID:26040	18	40535761	40535467	294	FALSE
TRHR	-0.710282	0.427044	0.26101	-32.2981	cg26989103	NM_003301.1	GeneID:7201	8	110168758	110168900	142	FALSE
USP11	-0.710586	0.23955	0.146383	-14.2495	cg16082125	NM_004651.3	GeneID:8237	X	46977504	46977258	246	TRUE	X:46977105-46978329
FLJ23514	-0.713659	0.232354	0.141683	-13.8065	cg16404106	NM_021827.2	GeneID:60494	11	85763271	85763426	155	TRUE	11:85763239-85763775
TRPM8	-0.714812	0.23764	0.14479	-14.2569	cg15746445	NM_024080.3	GeneID:79054	2	234489672	234490782	1110	FALSE
PYHIN1	-0.715514	0.400603	0.243962	-29.5699	cg19884600	NM_152501.2	GeneID:149628	1	157168562	157167974	588	FALSE
MAGEL2	-0.715822	0.496672	0.302403	-42.5028	cg02982734	NM_019066.2	GeneID:54551	15	21442141	21442082	59	TRUE	15:21442139-21442830
ERAF	-0.715862	0.306427	0.186565	-20.1273	cg02989940	NM_016633.2	GeneID:51327	16	31446735	31446704	31	FALSE
NEUROD6	-0.71615	0.250796	0.152664	-15.3599	cg26312920	NM_022728.2	GeneID:63974	7	31346915	31347063	148	FALSE
IQCF2	-0.716468	0.313959	0.191071	-20.849	cg10691387	NM_203424.1	GeneID:389123	3	51870658	51870685	27	FALSE
SLC24A2	-0.719217	0.561164	0.340866	-54.4974	cg12348970	NM_020344.1	GeneID:25769	9	19776543	19776926	383	FALSE
FLJ22655	-0.719719	0.541734	0.328949	-50.7792	cg19229991	NM_024730.2	GeneID:79785	12	18133816	18134381	565	FALSE
FBXO44	-0.720076	0.370506	0.224921	-26.5612	cg06848073	NM_001014765.1	GeneID:93611	1	11636127	11637019	892	FALSE
PGBD5	-0.723571	0.529257	0.320516	-48.9201	cg19560210	NM_024554.2	GeneID:79605	1	228579960	228579990	30	FALSE
NELF	-0.725165	0.332919	0.201392	-23.109	cg01970325	NM_015537.3	GeneID:26012	9	139474062	139473575	487	FALSE
MAP4K1	-0.725339	0.409103	0.247448	-31.3203	cg15679651	NM_007181.3	GeneID:11184	19	43800369	43800396	27	FALSE
PPP3R2	-0.726217	0.370213	0.223789	-26.9764	cg15765694	NM_147180.2	GeneID:5535	9	103397922	103397104	818	FALSE
SLC36A3	-0.726546	0.542094	0.327614	-51.7012	cg22445920	NM_181774.2	GeneID:285641	5	150663371	150663520	149	FALSE
CYP4F11	-0.728013	0.273431	0.16508	-17.8586	cg03190825	NM_021187.2	GeneID:57834	19	15906788	15906326	462	FALSE
CFHR5	-0.729176	0.396807	0.239373	-30.1745	cg25840094	NM_030787.1	GeneID:81494	1	195212153	195213327	1174	FALSE
TSPAN32	-0.729441	0.459716	0.277272	-38.3596	cg00041575	NM_139022.2	GeneID:10077	11	2279317	2279819	502	TRUE	11:2279186-2279450
SYN3	-0.730362	0.216656	0.13059	-13.1814	cg20904010	NM_003490.2	GeneID:8224	22	31732393	31732683	290	FALSE
CIITA	-0.730581	0.250536	0.150988	-15.9629	cg01351032	NM_000246.2	GeneID:4261	16	10878692	10878558	134	FALSE
H19	-0.731032	0.393832	0.237273	-29.9698	cg06197492	NT_009237.17	GeneID:283120	11	1973181			TRUE	11:1973035-1973716
DLG7	-0.732816	0.450743	0.271225	-37.4105	cg27443050	NM_014750.3	GeneID:9787	14	54728155	54728149	6	TRUE	14:54727608-54728433
CCL3	-0.732983	0.238618	0.143567	-15.0227	cg22518733	NM_002983.1	GeneID:6348	17	31441688	31441600	88	FALSE
LDHC	-0.733923	0.535838	0.322182	-51.4348	cg05740244	NM_017448.1	GeneID:3948	11	18390591	18390429	162	TRUE	11:18389965-18390649
OR12D3	-0.734846	0.288127	0.17313	-19.4496	cg03608577	NM_030959.2	GeneID:81797	6	29450658	29451047	389	FALSE
MAGEC2	-0.73518	0.348037	0.209081	-25.2013	cg15602735	NM_016249.2	GeneID:51438	X	141120999	141120742	257	FALSE
TAS1R2	-0.735267	0.506651	0.304349	-46.2959	cg18524091	NM_152232.1	GeneID:80834	1	19058359	19058742	383	FALSE
FLJ46481	-0.735995	0.560992	0.336822	-56.7098	cg00958560	NM_207405.1	GeneID:389197	4	6040940	6041067	127	FALSE
CREB5	-0.736187	0.303824	0.182393	-20.9692	cg02611282	NM_182898.2	GeneID:9586	7	28305510	28305465	45	FALSE
MORN1	-0.739377	0.585915	0.350962	-62.6626	cg03533858	NM_024848.1	GeneID:79906	1	2314256	2312853	1403	FALSE
MBD4	-0.742583	0.327643	0.195822	-23.6126	cg18303397	NM_003925.1	GeneID:8930	3	130642825	130641542	1283	FALSE
FLJ32065	-0.743421	0.228952	0.136758	-14.6195	cg20247048	NM_153032.1	GeneID:201283	17	60402820	60402148	672	TRUE	17:60401847-60403229
CD72	-0.744352	0.3576	0.213464	-26.8291	cg12971694	NM_001782.1	GeneID:971	9	35608412	35608408	4	FALSE
OR7A5	-0.744643	0.371606	0.22178	-28.371	cg02124291	NM_017506.1	GeneID:26659	19	14800260	14800276	16	FALSE
SULT1C1	-0.745538	0.526264	0.313888	-51.04	cg13968390	NM_001056.3	GeneID:6819	2	108271244	108271527	283	FALSE
THRAP4	-0.745873	0.427123	0.254696	-35.3771	cg14592065	NM_014815.2	GeneID:9862	17	35463519	35463652	133	TRUE	17:35463486-35463965
CHCHD4	-0.746629	0.232946	0.138835	-15.0724	cg21666675	NM_144636.1	GeneID:131474	3	14140844	14141323	479	TRUE	3:14140551-14142142
CDH18	-0.747346	0.408742	0.243487	-33.0417	cg27043873	NM_004934.2	GeneID:1016	5	20017186	20017046	140	FALSE
IL5RA	-0.748398	0.395662	0.235524	-31.5016	cg10159529	NM_000564.2	GeneID:3568	3	3127530	3127031	499	FALSE
ELOVL3	-0.748773	0.4224	0.251374	-34.9525	cg18390025	NM_152310.1	GeneID:83401	10	103976726	103976133	593	TRUE	10:103976562-103976832
UBL4B	-0.748977	0.516492	0.307326	-49.6078	cg10241097	NM_203412.1	GeneID:164153	1	110456183	110456585	402	FALSE
SLC30A8	-0.749608	0.47966	0.285285	-43.3507	cg07459489	NM_173851.2	GeneID:169026	8	118216344	118216518	174	FALSE
CD53	-0.751662	0.337621	0.200519	-25.1567	cg22325572	NM_000560.2	GeneID:963	1	111217704	111217296	408	FALSE
CLOCK	-0.752158	0.279229	0.165782	-19.4798	cg05960024	NM_004898.2	GeneID:9575	4	56070777	56070989	212	FALSE
CFHR2	-0.753066	0.283975	0.168494	-19.9673	cg09551916	NM_005666.2	GeneID:3080	1	195178511	195179557	1046	FALSE
TUBA2	-0.753427	0.304355	0.180541	-21.9477	cg06437862	NM_079836.1	GeneID:7278	13	18654096	18653936	160	TRUE	13:18653806-18654153
C10orf11	-0.755968	0.415325	0.245934	-34.6101	cg25414165	NM_032024.2	GeneID:83938	10	77212494	77212525	31	TRUE	10:77212410-77212612
EPHX1	-0.757263	0.379995	0.224811	-30.2878	cg03459809	NM_000120.2	GeneID:2052	1	224079633	224079599	34	FALSE
SLC4A1	-0.757441	0.475129	0.28106	-43.4262	cg03580247	NM_000342.1	GeneID:6521	17	39701014	39700993	21	FALSE
ASL	-0.758776	0.370472	0.218948	-29.2763	cg20857947	NM_001024943.1	GeneID:435	7	65177827	65178211	384	TRUE	7:65176941-65178652
CALN1	-0.758988	0.580745	0.343168	-64.2833	cg11828089	NM_031468.2	GeneID:83698	7	71516057	71515239	818	FALSE
SLC35D2	-0.760375	0.204524	0.120739	-13.1989	cg15582789	NM_007001.1	GeneID:11046	9	98185346	98185758	412	TRUE	9:98185223-98186088
FLJ43505	-0.761331	0.351583	0.207417	-27.2853	cg18665384	NM_207468.1	GeneID:400823	1	220976632	220977181	549	FALSE
PRKAR2B	-0.762207	0.21693	0.1279	-14.3042	cg21250978	NM_002736.2	GeneID:5577	7	106471777	106472414	637	FALSE
TNK2	-0.763243	0.280686	0.165372	-20.1665	cg21008828	NM_001010938.1	GeneID:10188	3	197119362	197120277	915	FALSE
NGB	-0.763414	0.271489	0.159934	-19.2974	cg15501381	NM_021257.3	GeneID:58157	14	76807553	76807408	145	TRUE	14:76806342-76807583
LOC221091	-0.763981	0.206789	0.121772	-13.5125	cg25620220	NM_203422.1	GeneID:221091	11	62213901	62213776	125	FALSE
ZNF44	-0.765919	0.246136	0.144747	-17.0677	cg24362016	NM_016264.2	GeneID:51710	19	12267154	12266637	517	TRUE	19:12265979-12267261
GAS2	-0.766882	0.534708	0.31424	-55.2582	cg03547797	NM_177553.1	GeneID:2620	11	22646220	22646230	10	FALSE
ZNF449	-0.767555	0.213817	0.125599	-14.2309	cg19392138	NM_152695.3	GeneID:203523	X	134306835	134306387	448	TRUE	X:134305143-134306880
TRIM51	-0.768141	0.348558	0.204664	-27.3939	cg04962134	NM_032681.1	GeneID:84767	11	55409886	55410032	146	FALSE
FLJ39237	-0.768404	0.34634	0.203324	-27.1759	cg22158923	NM_198571.1	GeneID:375607	7	100610889	100610277	612	FALSE
OPHN1	-0.769247	0.282234	0.165593	-20.6237	cg04702045	NM_002547.1	GeneID:4983	X	67570323	67570372	49	TRUE	X:67569334-67570801
IFNA17	-0.769558	0.213322	0.125134	-14.253	cg01074640	NM_021268.1	GeneID:3451	9	21218142	21218221	79	FALSE
BHLHB9	-0.770957	0.266811	0.156359	-19.2225	cg00968475	NM_030639.1	GeneID:80823	X	101862394	101862310	84	TRUE	X:101862184-101862707
C1orf90	-0.77137	0.360939	0.21146	-29.0312	cg12278770	NM_032648.1	GeneID:84734	1	32485367	32485421	54	FALSE
RPS12	-0.771924	0.521787	0.305577	-53.2695	cg12855988	NM_001016.3	GeneID:6206	6	133177597	133177401	196	TRUE	6:133176371-133177865
MYH1	-0.773289	0.332125	0.194321	-25.9114	cg00134787	NM_005963.2	GeneID:4619	17	10360224	10360684	460	FALSE
CRHR1	-0.774166	0.218322	0.127659	-14.8415	cg08929103	NM_004382.2	GeneID:1394	17	41216118	41217449	1331	FALSE
ACTN3	-0.775417	0.314376	0.183665	-24.1261	cg04663194	NM_001104.1	GeneID:89	11	66071815	66070967	848	FALSE
ACADVL	-0.777278	0.346035	0.2019	-27.7045	cg24825722	NM_000018.2	GeneID:37	17	7062572	7063877	1305	FALSE
UBL4B	-0.777774	0.428428	0.249888	-38.3012	cg24346637	NM_203412.1	GeneID:164153	1	110456815	110456585	230	FALSE
EIF4B	-0.777875	0.196403	0.114547	-13.0717	cg09478045	NM_001417.2	GeneID:1975	12	51686140	51686519	379	TRUE	12:51685609-51687446
RAP2C	-0.779445	0.332779	0.193874	-26.3515	cg14570389	NM_021183.3	GeneID:57826	X	131179224	131179870	646	TRUE	X:131178964-131180354
BRWD3	-0.779697	0.307681	0.179221	-23.6869	cg03164831	NM_153252.2	GeneID:254065	X	79952117	79951889	228	TRUE	X:79951204-79952473
RAB17	-0.787622	0.232764	0.13484	-16.7138	cg02397720	NM_022449.1	GeneID:64284	2	238177146	238177653	507	FALSE
PHF6	-0.78805	0.233494	0.135223	-16.7948	cg02804166	NM_001015877.1	GeneID:84295	X	133334662	133335008	346	TRUE	X:133334537-133335508
GOLGA1	-0.788472	0.201509	0.116665	-13.8607	cg24412846	NM_002077.2	GeneID:2800	9	126742491	126743178	687	FALSE
PDLIM4	-0.789302	0.34314	0.198549	-28.1406	cg20512303	NM_003687.2	GeneID:8572	5	131620858	131621286	428	TRUE	5:131620858-131621718
HOXA9	-0.791168	0.196862	0.113762	-13.5398	cg25047280	NM_152739.2	GeneID:3205	7	27172004	27171674	330	TRUE	7:27170287-27173690
KRTAP9-4	-0.791457	0.477	0.275592	-47.23	cg00550617	NM_033191.2	GeneID:85280	17	36659343	36659465	122	FALSE
ABP1	-0.791564	0.547254	0.316158	-61.2033	cg07897701	NM_001091.2	GeneID:26	7	150180303	150180506	203	FALSE
CCR6	-0.791923	0.624459	0.360671	-81.5151	cg05824215	NM_004367.3	GeneID:1235	6	167456036	167456247	211	FALSE
LOC114984	-0.795561	0.199482	0.114925	-13.9115	cg12741488	NM_138439.1	GeneID:114984	16	2873842	2873319	523	TRUE	16:2871432-2874750
MGMT	-0.795776	0.513234	0.29564	-54.5031	cg17686260	NT_008818.15	GeneID:4255	10	131302754			TRUE	10:131302456-131302963
SLC39A5	-0.79683	0.314355	0.180947	-25.3753	cg03343942	NM_173596.1	GeneID:283375	12	54911376	54910894	482	FALSE
MLSTD1	-0.796926	0.332065	0.191128	-27.3688	cg21522988	NM_018099.3	GeneID:55711	12	29268139	29267865	274	FALSE
MS4A6E	-0.797145	0.204108	0.117462	-14.3728	cg08935003	NM_139249.2	GeneID:245802	11	59858137	59858931	794	FALSE
CHID1	-0.798909	0.426951	0.245404	-40.0133	cg07066326	NM_023947.2	GeneID:66005	11	900094	900823	729	TRUE	11:899845-901817
TRIM54	-0.799024	0.474876	0.272929	-47.6853	cg25218351	NM_032546.2	GeneID:57159	2	27358950	27359104	154	FALSE
CNTN4	-0.799282	0.259915	0.149356	-19.8465	cg10503138	NM_175607.1	GeneID:152330	3	2117391	2117247	144	FALSE
MYH4	-0.799977	0.261424	0.150151	-20.0305	cg23400451	NM_017533.1	GeneID:4622	17	10314453	10313601	852	FALSE
KRTHB2	-0.800099	0.66577	0.382358	-97.4667	cg13696887	NM_033033.3	GeneID:3888	12	51086690	51086443	247	FALSE
TMPRSS11F	-0.803032	0.209083	0.119834	-15.0227	cg20695587	NM_207407.1	GeneID:389208	4	68678354	68678182	172	FALSE
PLA2G2D	-0.803294	0.55894	0.320295	-65.3678	cg07142319	NM_012400.2	GeneID:26279	1	20319244	20318595	649	FALSE
LDOC1	-0.804333	0.229906	0.13165	-17.1205	cg14562990	NM_012317.2	GeneID:23641	X	140099292	140098976	316	TRUE	X:140098194-140099366
CRYBB2	-0.806206	0.316716	0.181125	-26.1648	cg10490064	NM_000496.1	GeneID:1415	22	23947422	23947385	37	FALSE
MPL	-0.80669	0.642582	0.367359	-90.2166	cg22607339	NM_005373.1	GeneID:4352	1	43575746	43576062	316	FALSE
LPO	-0.807847	0.492727	0.281462	-51.9368	cg24489015	NM_006151.1	GeneID:4025	17	53671161	53670847	314	FALSE
RHOH	-0.810209	0.568207	0.324048	-68.6579	cg11903057	NM_004310.2	GeneID:399	4	39875171	39874997	174	FALSE
PLA2G2F	-0.81125	0.360676	0.205545	-31.785	cg11933267	NM_022819.2	GeneID:64600	1	20338719	20338406	313	FALSE
ANP32D	-0.811497	0.305275	0.173943	-25.1895	cg15711744	NM_012404.2	GeneID:23519	12	47152405	47152715	310	FALSE
C1QA	-0.812781	0.263236	0.149856	-20.8211	cg00108454	NM_015991.1	GeneID:712	1	22836201	22836687	486	FALSE
CST9L	-0.813477	0.436955	0.248631	-42.7973	cg27655855	NM_080610.1	GeneID:128821	20	23497455	23497329	126	FALSE
ISYNA1	-0.813738	0.293902	0.167203	-24.064	cg09374949	NM_016368.3	GeneID:51477	19	18409964	18409943	21	TRUE	19:18407006-18410264
DEFB123	-0.814585	0.250932	0.142673	-19.6422	cg19241311	NM_153324.2	GeneID:245936	20	29492554	29492072	482	FALSE
CD19	-0.815638	0.199035	0.113083	-14.5116	cg07597976	NM_001770.3	GeneID:930	16	28850520	28850779	259	FALSE
PDGFD	-0.815923	0.283907	0.161272	-23.1286	cg08596000	NM_025208.3	GeneID:80310	11	103540414	103540099	315	TRUE	11:103539718-103540442
GUCY2F	-0.816809	0.254407	0.144426	-20.0854	cg24286301	NM_001522.1	GeneID:2986	X	108612196	108611941	255	FALSE
B3GALT1	-0.817917	0.3369	0.19111	-29.281	cg19723473	NM_020981.2	GeneID:8708	2	168383286	168383428	142	FALSE
PATE	-0.817996	0.575912	0.326674	-71.8704	cg10377274	NM_138294.2	GeneID:160065	11	125122098	125121398	700	FALSE
MARCO	-0.818151	0.389854	0.221113	-36.2102	cg02431964	NM_006770.3	GeneID:8685	2	119416499	119416215	284	FALSE
ACSM1	-0.818468	0.29567	0.167658	-24.4997	cg13619990	NM_052956.1	GeneID:116285	16	20610738	20610079	659	FALSE
KRT5	-0.818864	0.493363	0.279681	-53.2521	cg04254916	NM_000424.2	GeneID:3852	12	51200314	51200510	196	TRUE	12:51200186-51200389
KIF12	-0.819755	0.242885	0.137604	-19.06	cg02838492	NM_138424.1	GeneID:113220	9	115901109	115901158	49	TRUE	9:115899815-115901565
LAMB1	-0.820833	0.258485	0.146332	-20.6981	cg10064162	NM_002291.1	GeneID:3912	7	107431485	107431040	445	TRUE	7:107429004-107431731
OR5I1	-0.820849	0.365866	0.20712	-33.1287	cg25890048	NM_006637.1	GeneID:10798	11	55460019	55460452	433	FALSE
OR2C3	-0.821573	0.217292	0.122949	-16.5593	cg13397379	NM_198074.3	GeneID:81472	1	245763251	245763764	513	FALSE
CFHR1	-0.824475	0.296564	0.167466	-24.9437	cg12687463	NM_002113.1	GeneID:3078	1	195054473	195055521	1048	FALSE
OR7A17	-0.824845	0.186712	0.105407	-13.6664	cg05112299	NM_030901.1	GeneID:26333	19	14852491	14853167	676	FALSE
ZNF143	-0.825278	0.428007	0.241556	-42.4732	cg14037413	NM_003442.3	GeneID:7702	11	9439170	9439089	81	TRUE	11:9438246-9439848
CYP2C18	-0.826317	0.575342	0.324474	-72.931	cg06852652	NM_000772.1	GeneID:1562	10	96432021	96433368	1347	FALSE
FLJ38377	-0.826455	0.296491	0.167195	-25.0457	cg05184394	NM_152698.1	GeneID:205147	2	131229243	131229583	340	FALSE
GPR12	-0.831244	0.58106	0.326581	-75.2417	cg15726245	NM_005288.1	GeneID:2835	13	26231506	26231964	458	TRUE	13:26230924-26231705
OR7C2	-0.83198	0.213453	0.119909	-16.5606	cg03544379	NM_012377.1	GeneID:26658	19	14913824	14913301	523	FALSE
CAV1	-0.832064	0.284416	0.159763	-23.9914	cg22126032	NT_007933.14	GeneID:857	7	115953765			TRUE	7:115951805-115954180
ATP12A	-0.832121	0.219771	0.123446	-17.1985	cg13337662	NM_001676.3	GeneID:479	13	24153297	24152695	602	TRUE	13:24152249-24153371
LRRC8B	-0.832466	0.575431	0.323144	-73.9223	cg15422784	NM_015350.1	GeneID:23507	1	89796301	89796860	559	FALSE
SSX4	-0.834471	0.270281	0.151571	-22.5886	cg10575735	NM_005636.3	GeneID:6759	X	48156567	48156288	279	FALSE
GPR142	-0.835276	0.503001	0.28192	-57.1704	cg03803009	NM_181790.1	GeneID:350383	17	69875229	69875240	11	FALSE
GPR116	-0.835325	0.290003	0.162534	-24.7981	cg14045072	NM_015234.3	GeneID:221395	6	46992321	46990825	1496	FALSE
CCL13	-0.835861	0.440032	0.246527	-45.4109	cg02706575	NM_005408.2	GeneID:6357	17	29707167	29707584	417	FALSE
hCAP-D3	-0.836178	0.302666	0.169531	-26.2997	cg09084200	NM_015261.2	GeneID:23310	11	133601073	133599636	1437	FALSE
BTNL8	-0.837158	0.333532	0.186693	-30.1188	cg24024214	NM_024850.1	GeneID:79908	5	180258748	180258765	17	TRUE	5:180258708-180258931
C6orf122	-0.838891	0.663272	0.370817	-103.852	cg21168884	NM_207502.1	GeneID:401288	6	169940896	169940846	50	FALSE
SPAM1	-0.838912	0.406069	0.227019	-40.3245	cg19292712	NM_003117.3	GeneID:6677	7	123351430	123352565	1135	FALSE
CYGB	-0.841043	0.26635	0.148687	-22.5102	cg17040807	NM_134268.3	GeneID:114757	17	72044877	72045377	500	TRUE	17:72044760-72046336
S100A10	-0.843622	0.62015	0.345574	-89.3519	cg10795646	NM_002966.1	GeneID:6281	1	150242190	150243040	850	FALSE
MGC44505	-0.843719	0.191526	0.106719	-14.6862	cg22937804	NM_178553.2	GeneID:339779	2	27215383	27215782	399	FALSE
ABCA4	-0.843743	0.60704	0.338241	-85.2308	cg12869058	NM_000350.1	GeneID:24	1	94360460	94359267	1193	FALSE
FRMD1	-0.844142	0.216726	0.120725	-17.3514	cg00350478	NM_024919.2	GeneID:79981	6	168222862	168222688	174	FALSE
CCL21	-0.845639	0.213164	0.118618	-17.0117	cg27443224	NM_002989.2	GeneID:6366	9	34700135	34700147	12	FALSE
ADAMTS14	-0.846107	0.345241	0.192052	-32.2162	cg19730092	NM_080722.2	GeneID:140766	10	72102803	72102565	238	TRUE	10:72101914-72102854
HOXA6	-0.846273	0.201247	0.111938	-15.7978	cg04265576	NM_024014.2	GeneID:3203	7	27153897	27153893	4	TRUE	7:27153320-27154370
CLEC4D	-0.847183	0.55834	0.310364	-71.5662	cg09546307	NM_080387.4	GeneID:338339	12	8556230	8557403	1173	TRUE	12:8556211-8556415
LUZP4	-0.848163	0.34759	0.193083	-32.6785	cg08693325	NM_016383.2	GeneID:51213	X	114430074	114430577	503	TRUE	X:114429798-114430105
PZP	-0.848871	0.474034	0.263193	-52.8488	cg01714932	NM_002864.1	GeneID:5858	12	9252121	9252233	112	FALSE
CCL1	-0.851482	0.536765	0.297483	-66.7393	cg20556988	NM_002981.1	GeneID:6346	17	29714240	29714365	125	FALSE
C11orf38	-0.852568	0.610882	0.338306	-88.0299	cg23743472	NM_212555.1	GeneID:399967	11	125154444	125153924	520	FALSE
LY9	-0.853047	0.420429	0.232756	-43.7517	cg18920397	NM_002348.2	GeneID:4063	1	159032429	159032552	123	FALSE
TXNRD2	-0.854113	0.210661	0.116539	-17.0686	cg23268677	NM_145747.1	GeneID:10587	22	18309097	18309515	418	TRUE	22:18308988-18309652
UNQ5810	-0.855147	0.27074	0.149668	-23.6508	cg23444894	NM_207384.1	GeneID:388218	16	19205244	19204602	642	FALSE
C20orf160	-0.85568	0.469635	0.259522	-52.7536	cg11801374	NM_080625.2	GeneID:140706	20	30061355	30061914	559	FALSE
REG3G	-0.857256	0.313195	0.172884	-28.7859	cg00918005	NM_001008387.1	GeneID:130120	2	79106718	79106334	384	FALSE
POF1B	-0.857754	0.228684	0.12619	-19.1405	cg24387818	NM_024921.2	GeneID:79983	X	84521412	84521404	8	FALSE
OR2F1	-0.859668	0.497096	0.273939	-58.8139	cg08634024	NM_012369.1	GeneID:26211	7	143288110	143287997	113	FALSE
ATP4A	-0.860788	0.331943	0.182785	-31.426	cg04713352	NM_000704.2	GeneID:495	19	40746853	40746400	453	FALSE
PDE6B	-0.862323	0.323961	0.1782	-30.4926	cg12435792	NM_000283.1	GeneID:5158	4	609375	609395	20	TRUE	4:609359-609999
PIPOX	-0.862599	0.192653	0.105952	-15.4387	cg22968401	NM_016518.2	GeneID:51268	17	24394135	24394044	91	FALSE
PMCHL1	-0.863948	0.268094	0.147304	-23.7648	cg12530080	NM_031887.2	GeneID:5369	5	22177396	22178218	822	FALSE
SLC39A7	-0.864811	0.564036	0.309723	-75.6041	cg10940418	NM_006979.1	GeneID:7922	6	33275283	33276675	1392	FALSE
MID2	-0.865277	0.485102	0.266292	-56.9311	cg20514061	NM_012216.2	GeneID:11043	X	106955994	106956116	122	TRUE	X:106955881-106956984
SNAPC2	-0.865734	0.22459	0.123248	-19.0368	cg24132694	NM_003083.1	GeneID:6618	19	7890945	7891229	284	TRUE	19:7890940-7892160
ABLIM3	-0.866441	0.259665	0.142426	-22.9377	cg05026186	NM_014945.1	GeneID:22885	5	148501069	148501326	257	TRUE	5:148500996-148501720
SLC22A8	-0.870178	0.193346	0.105776	-15.7833	cg06917325	NM_004254.2	GeneID:9376	11	62539699	62539887	188	FALSE
A4GNT	-0.873953	0.536316	0.292641	-69.606	cg17687282	NM_016161.1	GeneID:51146	3	139333801	139333897	96	FALSE
PRDM11	-0.875543	0.386795	0.210822	-40.3982	cg20227165	NM_020229.2	GeneID:56981	11	45072395	45072140	255	FALSE
FLJ43339	-0.876216	0.53097	0.28927	-68.5517	cg13474734	NM_207380.1	GeneID:388115	15	38418083	38417626	457	FALSE
NMUR2	-0.878885	0.265365	0.144302	-24.1754	cg03914397	NM_020167.3	GeneID:56923	5	151764634	151765017	383	TRUE	5:151764215-151764644
PNLIP	-0.880057	0.334831	0.181929	-33.0691	cg11812202	NM_000936.2	GeneID:5406	10	118295399	118295418	19	FALSE
TTLL6	-0.880535	0.493603	0.268109	-60.6233	cg08901867	NM_173623.1	GeneID:284076	17	44226041	44226685	644	TRUE	17:44225747-44226049
C12orf54	-0.880587	0.45966	0.249663	-53.4018	cg12133004	NM_152319.2	GeneID:121273	12	47162427	47163290	863	FALSE
CHST13	-0.88097	0.388981	0.211218	-41.1863	cg22919728	NM_152889.1	GeneID:166012	3	127725180	127725866	686	FALSE
MS4A7	-0.882492	0.218819	0.118694	-19.0566	cg18343292	NM_021201.4	GeneID:58475	11	59902654	59902534	120	FALSE
PGRMC1	-0.882761	0.454422	0.246446	-52.6707	cg07876586	NM_006667.2	GeneID:10857	X	118254384	118254291	93	TRUE	X:118253585-118255522
FLJ39827	-0.884251	0.252555	0.136827	-22.9463	cg07137581	NM_152424.1	GeneID:139285	X	63342501	63342349	152	TRUE	X:63341719-63343009
C5orf20	-0.884478	0.333909	0.180873	-33.2439	cg14722162	NM_130848.1	GeneID:140947	5	134811085	134810937	148	FALSE
GK2	-0.884498	0.191663	0.103819	-16.091	cg17738194	NM_033214.2	GeneID:2712	4	80548412	80548396	16	TRUE	4:80548404-80548638
EMR3	-0.884976	0.235881	0.127729	-21.0619	cg00401678	NM_032571.2	GeneID:84658	19	14648227	14646810	1417	TRUE	19:14648104-14648551
IFNA8	-0.885849	0.328637	0.177848	-32.6449	cg15669228	NM_002170.2	GeneID:3445	9	21399505	21399133	372	FALSE
C19orf30	-0.885922	0.295044	0.15966	-28.1765	cg21300318	NM_174947.2	GeneID:284424	19	4720206	4720152	54	TRUE	19:4720131-4720332
SLC28A2	-0.8878	0.506279	0.273612	-64.1009	cg01789267	NM_004212.1	GeneID:9153	15	43332403	43331726	677	FALSE
RGS8	-0.888277	0.254478	0.137484	-23.3707	cg17124700	NM_033345.1	GeneID:85397	1	180909371	180908672	699	FALSE
CTH	-0.888384	0.173324	0.0936328	-14.1976	cg21452766	NM_001902.4	GeneID:1491	1	70649676	70649543	133	TRUE	1:70649023-70649842
MS4A5	-0.888581	0.404522	0.218501	-44.3069	cg06066303	NM_023945.2	GeneID:64232	11	59953714	59953638	76	FALSE
CACNA2D2	-0.890187	0.162242	0.0875366	-13.0524	cg04555771	NM_001005505.1	GeneID:9254	3	50515141	50515896	755	TRUE	3:50515139-50516486
SPIC	-0.89033	0.248762	0.134205	-22.7869	cg01917648	NM_152323.1	GeneID:121599	12	100395468	100394788	680	FALSE
[truncated: 489 more rows]
